# Supplementary material for: Dynamic expression of small non-coding RNAs, including novel microRNAs and piRNAs/21U-RNAs, during Caenorhabditis elegansdevelopment
Source: Springer Nature journal article supplement (doi:10.1186/gb-2009-10-5-r54), 2009-05-21
Supplement: Additional file 1 [file gb-2009-10-5-r54-s1.pdf]

| Samples                     |                                | Number of reads (raw sequence) | Number of reads that matched to the <i>C. elegans</i> genome | Known miRNAs | Known 21U-RNAs | tRNAs | rRNAs   | snoRNAs | Other reads |         |
|-----------------------------|--------------------------------|--------------------------------|--------------------------------------------------------------|--------------|----------------|-------|---------|---------|-------------|---------|
| wild-type N2 hermaphrodites | Embryo                         | 14251981                       | 5742750                                                      | 1905997      | 70888          | 10308 | 1220025 | 5532    | 2530000     |         |
|                             |                                |                                | %                                                            | 33.19        | 1.23           | 0.18  | 21.24   | 0.10    | 44.00       |         |
|                             | mid-L1                         | 10013600                       | 5617234                                                      | 3432825      | 48300          | 4274  | 293218  | 2462    | 1836155     |         |
|                             |                                |                                | %                                                            | 61.11        | 0.86           | 0.08  | 5.22    | 0.04    | 32.69       |         |
|                             | mid-L2                         | 10031813                       | 6047597                                                      | 4016452      | 25978          | 2702  | 300577  | 1652    | 1700236     |         |
|                             |                                |                                | %                                                            | 66.41        | 0.43           | 0.04  | 4.97    | 0.03    | 28.11       |         |
|                             | mid-L3                         | 9191014                        | 4948026                                                      | 3125869      | 32624          | 2135  | 213152  | 1723    | 1572523     |         |
|                             |                                |                                | %                                                            | 63.17        | 0.66           | 0.04  | 4.31    | 0.03    | 31.78       |         |
|                             | mid-L4                         | 8917357                        | 6072252                                                      | 4162442      | 249374         | 1890  | 83359   | 611     | 1574576     |         |
|                             |                                |                                | %                                                            | 68.55        | 4.11           | 0.03  | 1.37    | 0.01    | 25.93       |         |
|                             | young adult                    | 9287316                        | 5975243                                                      | 3854485      | 407042         | 4925  | 102615  | 702     | 1605474     |         |
|                             |                                |                                | %                                                            | 64.51        | 6.81           | 0.08  | 1.72    | 0.01    | 26.87       |         |
|                             | males<br><i>dpy-28;him-8</i>   | young adult                    | 11985021                                                     | 7602104      | 3863173        | 28273 | 47937   | 1134185 | 5532        | 2523004 |
|                             |                                |                                |                                                              | %            | 50.82          | 0.37  | 0.63    | 14.92   | 0.07        | 33.19   |
|                             | Total number of sequence reads |                                | 73678102                                                     | 42005206     |                |       |         |         |             |         |
