# Supplementary material for: Dynamic expression of small non-coding RNAs, including novel microRNAs and piRNAs/21U-RNAs, during Caenorhabditis elegansdevelopment
Source: Springer Nature journal article supplement (doi:10.1186/gb-2009-10-5-r54), 2009-05-21
Supplement: Additional file 13 [file gb-2009-10-5-r54-s13.pdf]

| Sequence name | Sequence of the longer 21U-RNAs | Nt length | Number of reads | Name of 21 nt mature 21U-RNA |
|---------------|---------------------------------|-----------|-----------------|------------------------------|
| 1851807_adh   | TAGATGTTCTGGAATTTCTGC           | 21        | 15              | 21UR-5                       |
| 1851808_adh   | TAGATGTTCTGGAATTTCTGCA          | 22        | 2               | 21UR-5                       |
| 2048288_adh   | TCTGCGATTGTTAGTTTTGCA           | 21        | 41              | 21UR-15                      |
| 2048289_adh   | TCTGCGATTGTTAGTTTTGCAAA         | 23        | 2               | 21UR-15                      |
| 1879276_adh   | TAGTGTAGAAAAGTGGTTGCT           | 21        | 2901            | 21UR-16                      |
| 1879285_adh   | TAGTGTAGAAAAGTGGTTGCTT          | 22        | 4               | 21UR-16                      |
| 1879291_adh   | TAGTGTAGAAAAGTGGTTGCTTG         | 23        | 4               | 21UR-16                      |
| 2137276_adh   | TGAATAATGTTTTCGTCGTAA           | 21        | 437             | 21UR-30                      |
| 2137277_adh   | TGAATAATGTTTTCGTCGTAA           | 22        | 2               | 21UR-30                      |
| 1968336_adh   | TCATAATATAGTTGGGACCTA           | 21        | 83              | 21UR-38                      |
| 1046143_adh   | CTCATAATATAGTTGGGACCTA          | 22        | 2               | 21UR-38                      |
| 2662554_adh   | TTGGATGAGTACATATGTGAT           | 21        | 411             | 21UR-59                      |
| 2662555_adh   | TTGGATGAGTACATATGTGATA          | 22        | 2               | 21UR-59                      |
| 2662556_adh   | TTGGATGAGTACATATGTGATAA         | 23        | 3               | 21UR-59                      |
| 2662557_adh   | TTGGATGAGTACATATGTGATAAA        | 25        | 1               | 21UR-59                      |
| 2571315_adh   | TTAGTCTGATAGTAACAAAAC           | 21        | 415             | 21UR-60                      |
| 2571319_adh   | TTAGTCTGATAGTAACAAAACG          | 22        | 1               | 21UR-60                      |
| 2571321_adh   | TTAGTCTGATAGTAACAAAACGG         | 23        | 6               | 21UR-60                      |
| 2571322_adh   | TTAGTCTGATAGTAACAAAACGGA        | 24        | 4               | 21UR-60                      |
| 2571323_adh   | TTAGTCTGATAGTAACAAAACGGAGC      | 26        | 1               | 21UR-60                      |
| 1927630_adh   | TATTGTAGATTTCTCCGCGCGG          | 21        | 814             | 21UR-66                      |
| 1927647_adh   | TATTGTAGATTTCTCCGCGCGGT         | 22        | 105             | 21UR-66                      |
| 1927660_adh   | TATTGTAGATTTCTCCGCGCGGTT        | 23        | 11              | 21UR-66                      |
| 1927663_adh   | TATTGTAGATTTCTCCGCGCGGTTT       | 24        | 3               | 21UR-66                      |
| 1927664_adh   | TATTGTAGATTTCTCCGCGCGGTTTT      | 26        | 1               | 21UR-66                      |
| 2509509_adh   | TGTGATCTCTACCGGTATAAC           | 21        | 563             | 21UR-68                      |
| 2509510_adh   | TGTGATCTCTACCGGTATAACA          | 22        | 4               | 21UR-68                      |
| 2509512_adh   | TGTGATCTCTACCGGTATAACAG         | 23        | 1               | 21UR-68                      |
| 2616087_adh   | TTCTCAGAATTCAGATGTGT            | 21        | 108             | 21UR-74                      |
| 248784_adh    | AATTCTCAGAATTCAGATGTGT          | 23        | 2               | 21UR-74                      |
| 1756964_adh   | TAAAGATGGAGTACTGTACTC           | 21        | 824             | 21UR-78                      |
| 1756967_adh   | TAAAGATGGAGTACTGTACTCT          | 22        | 1               | 21UR-78                      |
| 2291452_adh   | TGCATTGTGTGAGCCGGAATC           | 21        | 187             | 21UR-79                      |
| 229592_adh    | AATGCATTGTGTGAGCCGGAATC         | 23        | 2               | 21UR-79                      |
| 2699855_adh   | TTTATTCGGATTAGCGTTAGG           | 21        | 158             | 21UR-93                      |
| 2699856_adh   | TTTATTCGGATTAGCGTTAGGT          | 22        | 1               | 21UR-93                      |
| 1957892_adh   | TCAGAATGACTAGAAAAGTTGG          | 21        | 23              | 21UR-97                      |
| 1957893_adh   | TCAGAATGACTAGAAAAGTTGGT         | 22        | 1               | 21UR-97                      |
| 2286363_adh   | TGCACCTTGAGGGGAACTAGA           | 21        | 16              | 21UR-103                     |
| 673008_adh    | ATGCACCTTGAGGGGAACTAGA          | 22        | 1               | 21UR-103                     |
| 1789171_adh   | TAAGTTCGAATTCGAGAAAGG           | 21        | 319             | 21UR-108                     |
| 1789172_adh   | TAAGTTCGAATTCGAGAAAGGA          | 22        | 1               | 21UR-108                     |
| 1789173_adh   | TAAGTTCGAATTCGAGAAAGGAGT        | 24        | 1               | 21UR-108                     |
| 2456765_adh   | TGGGGTTGTAGATATAGAAGA           | 21        | 6577            | 21UR-116                     |
| 2456770_adh   | TGGGGTTGTAGATATAGAAGAC          | 22        | 1               | 21UR-116                     |
| 2456773_adh   | TGGGGTTGTAGATATAGAAGACT         | 23        | 4               | 21UR-116                     |
| 2456774_adh   | TGGGGTTGTAGATATAGAAGACTT        | 24        | 1               | 21UR-116                     |

|             |                           |    |      |          |
|-------------|---------------------------|----|------|----------|
| 2456775_adh | TGGGGTTGTAGATATAGAAGACTTA | 25 | 3    | 21UR-116 |
| 1834989_adh | TACTTCTGGATAAAAGTTACA     | 21 | 55   | 21UR-124 |
| 600533_adh  | ATACTTCTGGATAAAAAGTTACA   | 22 | 1    | 21UR-124 |
| 1746952_adh | TAAAAATAGCGTGTATGTACA     | 21 | 52   | 21UR-130 |
| 1746953_adh | TAAAAATAGCGTGTATGTACAAAT  | 24 | 1    | 21UR-130 |
| 2473732_adh | TGGTGTGCCAGAAGATATAT      | 21 | 28   | 21UR-140 |
| 239280_adh  | AATGGTGTGCCAGAAGATATAT    | 23 | 1    | 21UR-140 |
| 1983723_adh | TCCGAAAAATCGATTATGGAC     | 21 | 123  | 21UR-148 |
| 1983724_adh | TCCGAAAAATCGATTATGGACA    | 22 | 3    | 21UR-148 |
| 1815942_adh | TACCATGGACATTACCACAAT     | 21 | 20   | 21UR-154 |
| 594577_adh  | ATACCATGGACATTACCACAAT    | 22 | 1    | 21UR-154 |
| 2616162_adh | TTCTCATCCGGTCCAAGAGGT     | 21 | 20   | 21UR-161 |
| 2616163_adh | TTCTCATCCGGTCCAAGAGGTTAT  | 24 | 1    | 21UR-161 |
| 2707387_adh | TTTCGCGTCGTCATCACAAAC     | 21 | 748  | 21UR-163 |
| 2707390_adh | TTTCGCGTCGTCATCACAAACT    | 22 | 1    | 21UR-163 |
| 2707392_adh | TTTCGCGTCGTCATCACAAACTT   | 23 | 1    | 21UR-163 |
| 1813294_adh | TACATCAATGACAGAAAGATC     | 21 | 84   | 21UR-166 |
| 593558_adh  | ATACATCAATGACAGAAAGATC    | 22 | 1    | 21UR-166 |
| 203236_adh  | AATACATCAATGACAGAAAGATC   | 23 | 1    | 21UR-166 |
| 2539465_adh | TTAAACAGCAATATGAACGAT     | 21 | 1385 | 21UR-183 |
| 2539468_adh | TTAAACAGCAATATGAACGATGGAA | 25 | 1    | 21UR-183 |
| 1971614_adh | TCATCTTATCGTGTACAATCC     | 21 | 51   | 21UR-222 |
| 214188_adh  | AATCATCTTATCGTGTACAATCC   | 23 | 1    | 21UR-222 |
| 2491734_adh | TGTATGATCAGTATGGAAAAT     | 21 | 1962 | 21UR-225 |
| 2491737_adh | TGTATGATCAGTATGGAAAATT    | 22 | 4    | 21UR-225 |
| 695507_adh  | ATGTATGATCAGTATGGAAAAT    | 22 | 1    | 21UR-225 |
| 240881_adh  | AATGTATGATCAGTATGGAAAAT   | 23 | 2    | 21UR-225 |
| 1918535_adh | TATGTCCATTAGAAGAATTCT     | 21 | 19   | 21UR-226 |
| 1918539_adh | TATGTCCATTAGAAGAATTCTTGT  | 24 | 1    | 21UR-226 |
| 2074125_adh | TGAAACTGTAAAAATTATGGC     | 21 | 712  | 21UR-228 |
| 1062000_adh | CTGAAACTGTAAAAATTATGGC    | 22 | 1    | 21UR-228 |
| 2074127_adh | TGAAACTGTAAAAATTATGGCT    | 22 | 8    | 21UR-228 |
| 1755973_adh | TAAACTTTTGATCCGGTTGCC     | 21 | 44   | 21UR-233 |
| 581487_adh  | ATAAACTTTTGATCCGGTTGCC    | 22 | 1    | 21UR-233 |
| 198971_adh  | AATAAACTTTTGATCCGGTTGCC   | 23 | 2    | 21UR-233 |
| 1944440_adh | TCACACACAACAAAGGCTAAA     | 21 | 54   | 21UR-266 |
| 1944441_adh | TCACACACAACAAAGGCTAAAAA   | 23 | 1    | 21UR-266 |
| 2533151_adh | TGTTTGCGTTGTTGTACATAT     | 21 | 133  | 21UR-269 |
| 701654_adh  | ATGTTTGCGTTGTTGTACATAT    | 22 | 1    | 21UR-269 |
| 1822306_adh | TACGACCGAACGAATACTGAA     | 21 | 127  | 21UR-279 |
| 1822307_adh | TACGACCGAACGAATACTGAAA    | 22 | 4    | 21UR-279 |
| 1822308_adh | TACGACCGAACGAATACTGAAAA   | 23 | 34   | 21UR-279 |
| 1822649_adh | TACGACTGGCGTACGTATTCT     | 21 | 3816 | 21UR-294 |
| 1822652_adh | TACGACTGGCGTACGTATTCTG    | 22 | 2    | 21UR-294 |
| 1822653_adh | TACGACTGGCGTACGTATTCTGT   | 23 | 6    | 21UR-294 |
| 1822654_adh | TACGACTGGCGTACGTATTCTGTT  | 24 | 2    | 21UR-294 |
| 1822655_adh | TACGACTGGCGTACGTATTCTGTTG | 25 | 1    | 21UR-294 |
| 2032178_adh | TCTACTTGTTGAATAATGGTA     | 21 | 2870 | 21UR-296 |
| 2032179_adh | TCTACTTGTTGAATAATGGTAAA   | 23 | 1    | 21UR-296 |
| 1835146_adh | TACTTGACGGGACCAATAAA      | 21 | 46   | 21UR-307 |

|             |                            |    |       |          |
|-------------|----------------------------|----|-------|----------|
| 1835147_adh | TACTTGACGGGACCAATTAAC      | 22 | 1     | 21UR-307 |
| 2526186_adh | TGTTCCAAGCATGTGTGATGG      | 21 | 30    | 21UR-312 |
| 2526187_adh | TGTTCCAAGCATGTGTGATGGCTC   | 24 | 1     | 21UR-312 |
| 2673107_adh | TTGGTTTTAGAATTGGATGCTT     | 21 | 429   | 21UR-313 |
| 2673108_adh | TTGGTTTTAGAATTGGATGCTTA    | 22 | 1     | 21UR-313 |
| 1832891_adh | TACTGCTTTTTCACTTCACGA      | 21 | 17    | 21UR-323 |
| 1832892_adh | TACTGCTTTTTCACTTCACGAAA    | 23 | 1     | 21UR-323 |
| 2047988_adh | TCTGCAGTTTTTGAACGCGTC      | 21 | 372   | 21UR-326 |
| 222447_adh  | AATCTGCAGTTTTTGAACGCGTC    | 23 | 2     | 21UR-326 |
| 1878465_adh | TAGTGGAACCTCAACGCTGA       | 21 | 47    | 21UR-337 |
| 1878466_adh | TAGTGGAACCTCAACGCTGAA      | 22 | 2     | 21UR-337 |
| 2011193_adh | TCGGACAAGAAGAATAGATCG      | 21 | 47    | 21UR-348 |
| 2011194_adh | TCGGACAAGAAGAATAGATCGA     | 22 | 18    | 21UR-348 |
| 2011195_adh | TCGGACAAGAAGAATAGATCGAG    | 23 | 12    | 21UR-348 |
| 2011196_adh | TCGGACAAGAAGAATAGATCGAGA   | 24 | 7     | 21UR-348 |
| 2016555_adh | TCGGGAGGAAATATTCGGGAC      | 21 | 105   | 21UR-388 |
| 2016557_adh | TCGGGAGGAAATATTCGGGACGA    | 23 | 1     | 21UR-388 |
| 2596511_adh | TTCCACTGATATCCATGGACA      | 21 | 388   | 21UR-398 |
| 2596512_adh | TTCCACTGATATCCATGGACAC     | 22 | 1     | 21UR-398 |
| 713396_adh  | ATTCCACTGATATCCATGGACA     | 22 | 1     | 21UR-398 |
| 2693295_adh | TTTACAGAAGGACAAACAGAG      | 21 | 433   | 21UR-399 |
| 2693297_adh | TTTACAGAAGGACAAACAGAGTGAC  | 25 | 1     | 21UR-399 |
| 1821799_adh | TACGAAGGATACATAGATCGT      | 21 | 318   | 21UR-405 |
| 596036_adh  | ATACGAAGGATACATAGATCGT     | 22 | 1     | 21UR-405 |
| 2417091_adh | TGGGAAAAAACGATTCTGCAT      | 21 | 1691  | 21UR-421 |
| 2417095_adh | TGGGAAAAAACGATTCTGCATC     | 22 | 1     | 21UR-421 |
| 2417096_adh | TGGGAAAAAACGATTCTGCATCTAAT | 26 | 1     | 21UR-421 |
| 1776600_adh | TAAGAGAGAAATAAGAGACTT      | 21 | 14    | 21UR-447 |
| 1776602_adh | TAAGAGAGAAATAAGAGACTTTGAT  | 25 | 2     | 21UR-447 |
| 1902490_adh | TATGACAACAACGATGACAAC      | 21 | 11273 | 21UR-453 |
| 1902491_adh | TATGACAACAACGATGACAACA     | 22 | 191   | 21UR-453 |
| 615632_adh  | ATATGACAACAACGATGACAAC     | 22 | 2     | 21UR-453 |
| 1902492_adh | TATGACAACAACGATGACAACAA    | 23 | 70    | 21UR-453 |
| 1902493_adh | TATGACAACAACGATGACAACAAA   | 24 | 27    | 21UR-453 |
| 1902494_adh | TATGACAACAACGATGACAACAAAA  | 25 | 5     | 21UR-453 |
| 1902495_adh | TATGACAACAACGATGACAACAAAAA | 26 | 1     | 21UR-453 |
| 1809241_adh | TACAATAACGTGTTTTATCT       | 21 | 28    | 21UR-455 |
| 591957_adh  | ATACAATAACGTGTTTTATCT      | 22 | 1     | 21UR-455 |
| 2052233_adh | TCTGTCACATGCGAGACCCGG      | 21 | 18    | 21UR-459 |
| 1632763_adh | GTCTGTACATGCGAGACCCGG      | 22 | 1     | 21UR-459 |
| 2052237_adh | TCTGTCACATGCGAGACCCGGG     | 22 | 1     | 21UR-459 |
| 1007504_adh | CGTCTGTACATGCGAGACCCGG     | 23 | 3     | 21UR-459 |
| 1632764_adh | GTCTGTACATGCGAGACCCGGG     | 23 | 1     | 21UR-459 |
| 1632765_adh | GTCTGTACATGCGAGACCCGGGT    | 24 | 2     | 21UR-459 |
| 2052238_adh | TCTGTCACATGCGAGACCCGGGTT   | 24 | 3     | 21UR-459 |
| 1632766_adh | GTCTGTACATGCGAGACCCGGGTT   | 25 | 2     | 21UR-459 |
| 2052239_adh | TCTGTCACATGCGAGACCCGGGTTT  | 25 | 1     | 21UR-459 |
| 2052240_adh | TCTGTCACATGCGAGACCCGGGTTCA | 26 | 1     | 21UR-459 |
| 1889887_adh | TATATATTCGCGTCAAGAA        | 21 | 8     | 21UR-469 |
| 612680_adh  | ATATATATTCGCGTCAAGAA       | 22 | 1     | 21UR-469 |

|             |                            |    |       |          |
|-------------|----------------------------|----|-------|----------|
| 2529325_adh | TGTTGCAACTGAAGAATCAAA      | 21 | 466   | 21UR-480 |
| 2529326_adh | TGTTGCAACTGAAGAATCAAAA     | 22 | 1     | 21UR-480 |
| 1965831_adh | TCAGTAGACATCTCTAACAGC      | 21 | 81    | 21UR-482 |
| 1965832_adh | TCAGTAGACATCTCTAACAGCA     | 22 | 1     | 21UR-482 |
| 2296121_adh | TGCGAATGGATTTTAGCTTGA      | 21 | 246   | 21UR-488 |
| 2296124_adh | TGCGAATGGATTTTAGCTTGAT     | 22 | 2     | 21UR-488 |
| 230345_adh  | AATGCGAATGGATTTTAGCTTGA    | 23 | 2     | 21UR-488 |
| 1813127_adh | TACATACTCATTGAATGGTAG      | 21 | 33    | 21UR-501 |
| 593479_adh  | ATACATACTCATTGAATGGTAG     | 22 | 1     | 21UR-501 |
| 1754370_adh | TAAACAGGACTTAATCTACAT      | 21 | 123   | 21UR-503 |
| 1754371_adh | TAAACAGGACTTAATCTACATA     | 22 | 1     | 21UR-503 |
| 1941613_adh | TCAATCTGAGGCTGCAAATGA      | 21 | 46    | 21UR-516 |
| 1941615_adh | TCAATCTGAGGCTGCAAATGAG     | 22 | 1     | 21UR-516 |
| 1837308_adh | TAGAAAGCATATTCATAGTTA      | 21 | 57    | 21UR-534 |
| 1837309_adh | TAGAAAGCATATTCATAGTTAGG    | 23 | 1     | 21UR-534 |
| 1861772_adh | TAGGAATGAGTTCAGTAAAGG      | 21 | 444   | 21UR-538 |
| 1861774_adh | TAGGAATGAGTTCAGTAAAGGT     | 22 | 3     | 21UR-538 |
| 1861775_adh | TAGGAATGAGTTCAGTAAAGGTAG   | 24 | 1     | 21UR-538 |
| 1861776_adh | TAGGAATGAGTTCAGTAAAGGTAGGT | 26 | 1     | 21UR-538 |
| 2131852_adh | TGAAGCTCGGCATCAAGTAGA      | 21 | 1739  | 21UR-548 |
| 2131854_adh | TGAAGCTCGGCATCAAGTAGAC     | 22 | 12    | 21UR-548 |
| 1933527_adh | TCAAAGCTCTGAAGATTTGCC      | 21 | 1354  | 21UR-552 |
| 1933528_adh | TCAAAGCTCTGAAGATTTGCCA     | 22 | 6     | 21UR-552 |
| 1933531_adh | TCAAAGCTCTGAAGATTTGCCAT    | 23 | 2     | 21UR-552 |
| 209681_adh  | AATCAAAGCTCTGAAGATTTGCC    | 23 | 2     | 21UR-552 |
| 1933532_adh | TCAAAGCTCTGAAGATTTGCCATCT  | 25 | 1     | 21UR-552 |
| 2532423_adh | TGTTTCGAACTTCAATGCAGG      | 21 | 1106  | 21UR-603 |
| 2532427_adh | TGTTTCGAACTTCAATGCAGGT     | 22 | 7     | 21UR-603 |
| 2075225_adh | TGAAAGAACGGAAGGATTTGT      | 21 | 624   | 21UR-607 |
| 2075226_adh | TGAAAGAACGGAAGGATTTGTA     | 22 | 6     | 21UR-607 |
| 2075228_adh | TGAAAGAACGGAAGGATTTGTAT    | 23 | 1     | 21UR-607 |
| 2140633_adh | TGAATCAGAACAATGGTACCC      | 21 | 17911 | 21UR-609 |
| 2630196_adh | TTGAATCAGAACAATGGTACCC     | 22 | 1     | 21UR-609 |
| 2497807_adh | TGTCGATAACCATACGCATGT      | 21 | 48    | 21UR-611 |
| 241276_adh  | AATGTCGATAACCATACGCATGT    | 23 | 3     | 21UR-611 |
| 1838257_adh | TAGAACATGCAGCTATGATGA      | 21 | 564   | 21UR-632 |
| 1032844_adh | CTAGAACATGCAGCTATGATGA     | 22 | 1     | 21UR-632 |
| 1838259_adh | TAGAACATGCAGCTATGATGAC     | 22 | 4     | 21UR-632 |
| 1838260_adh | TAGAACATGCAGCTATGATGACAC   | 24 | 1     | 21UR-632 |
| 1813924_adh | TACATGGTCATTTTATTCTGG      | 21 | 12    | 21UR-662 |
| 593978_adh  | ATACATGGTCATTTTATTCTGG     | 22 | 1     | 21UR-662 |
| 1829630_adh | TACTACGACAGGAGATGAATA      | 21 | 978   | 21UR-681 |
| 1031610_adh | CTACTACGACAGGAGATGAATA     | 22 | 1     | 21UR-681 |
| 1829632_adh | TACTACGACAGGAGATGAATAC     | 22 | 3     | 21UR-681 |
| 2152232_adh | TGACAATGGTTTATGAACGGT      | 21 | 24701 | 21UR-690 |
| 2152240_adh | TGACAATGGTTTATGAACGGTT     | 22 | 15    | 21UR-690 |
| 2152241_adh | TGACAATGGTTTATGAACGGTTAT   | 24 | 2     | 21UR-690 |
| 2152242_adh | TGACAATGGTTTATGAACGGTTATTT | 26 | 1     | 21UR-690 |
| 1761264_adh | TAAATGAAGTAGAAAAAATAC      | 21 | 335   | 21UR-691 |
| 1761266_adh | TAAATGAAGTAGAAAAAATACT     | 22 | 1     | 21UR-691 |

|             |                             |    |       |          |
|-------------|-----------------------------|----|-------|----------|
| 1914227_adh | TATGGAGTAGTATAACCAAAA       | 21 | 1083  | 21UR-692 |
| 1914228_adh | TATGGAGTAGTATAACCAAAAA      | 22 | 4     | 21UR-692 |
| 1914229_adh | TATGGAGTAGTATAACCAAAAAA     | 23 | 2     | 21UR-692 |
| 208666_adh  | AATATGGAGTAGTATAACCAAAA     | 23 | 3     | 21UR-692 |
| 1914230_adh | TATGGAGTAGTATAACCAAAAAAT    | 24 | 1     | 21UR-692 |
| 1833796_adh | TACTGTATTTGTAAGCCATGA       | 21 | 50    | 21UR-700 |
| 1833798_adh | TACTGTATTTGTAAGCCATGAAC     | 23 | 1     | 21UR-700 |
| 2045513_adh | TCTGACGAGTAGAGTTTAGAA       | 21 | 11511 | 21UR-703 |
| 2045514_adh | TCTGACGAGTAGAGTTTAGAAA      | 22 | 34    | 21UR-703 |
| 2045519_adh | TCTGACGAGTAGAGTTTAGAAAT     | 23 | 24    | 21UR-703 |
| 2618157_adh | TTCTGACGAGTAGAGTTTAGAAA     | 23 | 1     | 21UR-703 |
| 2045522_adh | TCTGACGAGTAGAGTTTAGAAATT    | 24 | 1     | 21UR-703 |
| 2045523_adh | TCTGACGAGTAGAGTTTAGAAATTTA  | 26 | 2     | 21UR-703 |
| 1978871_adh | TCCAGTAGCCTTGATTATCGG       | 21 | 731   | 21UR-711 |
| 1978872_adh | TCCAGTAGCCTTGATTATCGGA      | 22 | 2     | 21UR-711 |
| 2478704_adh | TGGTTTGTTACGTCGATTCAC       | 21 | 155   | 21UR-712 |
| 2478705_adh | TGGTTTGTTACGTCGATTCACC      | 22 | 1     | 21UR-712 |
| 1910982_adh | TATGATCAGGCATCCTAAACT       | 21 | 3013  | 21UR-715 |
| 1910984_adh | TATGATCAGGCATCCTAAACTC      | 22 | 5     | 21UR-715 |
| 616018_adh  | ATATGATCAGGCATCCTAAACT      | 22 | 1     | 21UR-715 |
| 1910985_adh | TATGATCAGGCATCCTAAACTCG     | 23 | 1     | 21UR-715 |
| 208544_adh  | AATATGATCAGGCATCCTAAACT     | 23 | 4     | 21UR-715 |
| 1910986_adh | TATGATCAGGCATCCTAAACTCGT    | 24 | 2     | 21UR-715 |
| 1910988_adh | TATGATCAGGCATCCTAAACTCGTT   | 25 | 1     | 21UR-715 |
| 2304263_adh | TGCGTGGTGAAAGGTTCTGT        | 21 | 263   | 21UR-735 |
| 2304264_adh | TGCGTGGTGAAAGGTTCTGTA       | 22 | 5     | 21UR-735 |
| 1874519_adh | TAGTAGATCTTGACAGAAGAA       | 21 | 1127  | 21UR-791 |
| 1036214_adh | CTAGTAGATCTTGACAGAAGAA      | 22 | 1     | 21UR-791 |
| 1809798_adh | TACAATGAGAAGCAATGTGAA       | 21 | 93    | 21UR-796 |
| 203022_adh  | AATACAATGAGAAGCAATGTGAA     | 23 | 1     | 21UR-796 |
| 2395707_adh | TGGATTTAGCAAGAAACCGAG       | 21 | 4977  | 21UR-798 |
| 1082557_adh | CTGGATTTAGCAAGAAACCGAG      | 22 | 1     | 21UR-798 |
| 2395716_adh | TGGATTTAGCAAGAAACCGAGT      | 22 | 7     | 21UR-798 |
| 2395717_adh | TGGATTTAGCAAGAAACCGAGTA     | 23 | 1     | 21UR-798 |
| 2395719_adh | TGGATTTAGCAAGAAACCGAGTAT    | 24 | 1     | 21UR-798 |
| 2395720_adh | TGGATTTAGCAAGAAACCGAGTATCT  | 26 | 1     | 21UR-798 |
| 2183919_adh | TGAGACGAGAAGAAAAGATTT       | 21 | 42    | 21UR-801 |
| 2183920_adh | TGAGACGAGAAGAAAAGATTTTC     | 22 | 1     | 21UR-801 |
| 2183921_adh | TGAGACGAGAAGAAAAGATTTTCATT  | 25 | 1     | 21UR-801 |
| 1628374_adh | GTCGGTGGTTCGAGCCCGCCCGA     | 23 | 12    | 21UR-803 |
| 1550539_adh | GGTCGGTGGTTCGAGCCCGCCCGA    | 24 | 2     | 21UR-803 |
| 1550540_adh | GGTCGGTGGTTCGAGCCCGCCCGAG   | 25 | 1     | 21UR-803 |
| 1181997_adh | GAAGGTTCGGTGGTTCGAGCCCGCCCG | 26 | 1     | 21UR-803 |
| 2553399_adh | TTACAACCTGTGTATGCTATGA      | 21 | 265   | 21UR-812 |
| 2553400_adh | TTACAACCTGTGTATGCTATGAA     | 22 | 7     | 21UR-812 |
| 1963342_adh | TCAGGAAAGCAAGAACTCGAA       | 21 | 950   | 21UR-845 |
| 1963343_adh | TCAGGAAAGCAAGAACTCGAAA      | 22 | 4     | 21UR-845 |
| 627949_adh  | ATCAGGAAAGCAAGAACTCGAA      | 22 | 1     | 21UR-845 |
| 213518_adh  | AATCAGGAAAGCAAGAACTCGAA     | 23 | 1     | 21UR-845 |
| 2278184_adh | TGATTTTCGGTTTGTAACCTTG      | 21 | 35    | 21UR-865 |

|             |                           |    |      |           |
|-------------|---------------------------|----|------|-----------|
| 2278187_adh | TGATTTTCGGTTTGTAACCTTTGCC | 23 | 1    | 21UR-865  |
| 2301979_adh | TGCGGGAGACAGACTTTGCAA     | 21 | 859  | 21UR-882  |
| 2301981_adh | TGCGGGAGACAGACTTTGCAAT    | 22 | 2    | 21UR-882  |
| 2678297_adh | TTGTTCGGATAACCACATTGGA    | 21 | 507  | 21UR-888  |
| 2678302_adh | TTGTTCGGATAACCACATTGGAT   | 22 | 1    | 21UR-888  |
| 253577_adh  | AATTGTTCGGATAACCACATTGGA  | 23 | 1    | 21UR-888  |
| 1781170_adh | TAAGATTTTGGTCCCAATGAA     | 21 | 48   | 21UR-911  |
| 1781171_adh | TAAGATTTTGGTCCCAATGAAA    | 22 | 1    | 21UR-911  |
| 1850557_adh | TAGATATTCTATTACTTGCGG     | 21 | 5    | 21UR-914  |
| 1850559_adh | TAGATATTCTATTACTTGCGGC    | 22 | 1    | 21UR-914  |
| 1943278_adh | TCAATTTAGTCTAAGCGGCAA     | 21 | 120  | 21UR-916  |
| 1943279_adh | TCAATTTAGTCTAAGCGGCAAAA   | 23 | 1    | 21UR-916  |
| 1797670_adh | TAATCAAGTAGTATGAAATTA     | 21 | 2747 | 21UR-920  |
| 1797671_adh | TAATCAAGTAGTATGAAATTA     | 22 | 1    | 21UR-920  |
| 1797672_adh | TAATCAAGTAGTATGAAATTA     | 23 | 3    | 21UR-920  |
| 201160_adh  | AATAATCAAGTAGTATGAAATTA   | 23 | 1    | 21UR-920  |
| 2592017_adh | TTCAGGAACGTTACTCATTAG     | 21 | 3118 | 21UR-928  |
| 2592019_adh | TTCAGGAACGTTACTCATTAGATAA | 26 | 1    | 21UR-928  |
| 2291577_adh | TGCATTTGCTGTCACCTGAAA     | 21 | 113  | 21UR-929  |
| 674348_adh  | ATGCATTTGCTGTCACCTGAAA    | 22 | 1    | 21UR-929  |
| 1918338_adh | TATGTCACGAGATTGGTTTAC     | 21 | 409  | 21UR-944  |
| 1918342_adh | TATGTCACGAGATTGGTTTACT    | 22 | 1    | 21UR-944  |
| 1804320_adh | TAATTGTGACTAAATTTTTGA     | 21 | 19   | 21UR-950  |
| 1804321_adh | TAATTGTGACTAAATTTTTGAAA   | 23 | 1    | 21UR-950  |
| 1867720_adh | TAGGCTTCGCAGTAGATTAAG     | 21 | 328  | 21UR-962  |
| 1035590_adh | CTAGGCTTCGCAGTAGATTAAG    | 22 | 2    | 21UR-962  |
| 1867722_adh | TAGGCTTCGCAGTAGATTAAGT    | 22 | 2    | 21UR-962  |
| 1901785_adh | TATGAAGATGATGAGCAATCT     | 21 | 124  | 21UR-970  |
| 1901786_adh | TATGAAGATGATGAGCAATCTAT   | 23 | 3    | 21UR-970  |
| 1747954_adh | TAAAACCGTAGAATAGAATCA     | 21 | 36   | 21UR-975  |
| 1747955_adh | TAAAACCGTAGAATAGAATCAAGA  | 24 | 2    | 21UR-975  |
| 1954171_adh | TCACTCCATACTACTAGAACA     | 21 | 258  | 21UR-981  |
| 1954173_adh | TCACTCCATACTACTAGAACATGT  | 25 | 1    | 21UR-981  |
| 2693187_adh | TTTACACACTTTAGTCGGGAT     | 21 | 467  | 21UR-998  |
| 254752_adh  | AATTTACACACTTTAGTCGGGAT   | 23 | 2    | 21UR-998  |
| 1880798_adh | TAGTTGAACAGTAATCTCAA      | 21 | 33   | 21UR-999  |
| 1880800_adh | TAGTTGAACAGTAATCTCAAAC    | 22 | 1    | 21UR-999  |
| 2143452_adh | TGAATGAGCAAATTAGAATTC     | 21 | 176  | 21UR-1005 |
| 2143453_adh | TGAATGAGCAAATTAGAATTCA    | 22 | 2    | 21UR-1005 |
| 2130734_adh | TGAAGCAGTTCAAATCTGATG     | 21 | 16   | 21UR-1006 |
| 224552_adh  | AATGAAGCAGTTCAAATCTGATG   | 23 | 2    | 21UR-1006 |
| 2018900_adh | TCGGTGAATTAATTCGGTGTC     | 21 | 954  | 21UR-1011 |
| 2018904_adh | TCGGTGAATTAATTCGGTGCT     | 22 | 1    | 21UR-1011 |
| 2168123_adh | TGACTCGTATTGGACTAAAA      | 21 | 1235 | 21UR-1016 |
| 2168125_adh | TGACTCGTATTGGACTAAAAAGA   | 23 | 3    | 21UR-1016 |
| 2099269_adh | TGAAATCTTCATGGTCGACGA     | 21 | 403  | 21UR-1017 |
| 660311_adh  | ATGAAATCTTCATGGTCGACGA    | 22 | 4    | 21UR-1017 |
| 2623897_adh | TTCTTTTGGGGTTTGATCGAA     | 21 | 94   | 21UR-1021 |
| 2623898_adh | TTCTTTTGGGGTTTGATCGAAGGT  | 24 | 1    | 21UR-1021 |
| 1915110_adh | TATGGATTCCAGAAAATTGTC     | 21 | 62   | 21UR-1022 |

|             |                            |    |      |           |
|-------------|----------------------------|----|------|-----------|
| 208695_adh  | AATATGGATTCCAGAAAATTGTC    | 23 | 1    | 21UR-1022 |
| 2501826_adh | TGTGAAGTGTGATTTTCGTGC      | 21 | 45   | 21UR-1032 |
| 2501829_adh | TGTGAAGTGTGATTTTCGTGCCG    | 23 | 1    | 21UR-1032 |
| 1971583_adh | TCATCTGTAGGACAACATTTA      | 21 | 11   | 21UR-1036 |
| 1971584_adh | TCATCTGTAGGACAACATTTAA     | 22 | 1    | 21UR-1036 |
| 1971585_adh | TCATCTGTAGGACAACATTTAATAA  | 25 | 1    | 21UR-1036 |
| 2700536_adh | TTTATTGTGAAGACTGTGACG      | 21 | 93   | 21UR-1051 |
| 2700537_adh | TTTATTGTGAAGACTGTGACGT     | 22 | 3    | 21UR-1051 |
| 2700538_adh | TTTATTGTGAAGACTGTGACGTAAT  | 25 | 1    | 21UR-1051 |
| 2233974_adh | TGAGCGCATTGTATACACTG       | 21 | 40   | 21UR-1063 |
| 667880_adh  | ATGAGCGCATTGTATACACTG      | 22 | 1    | 21UR-1063 |
| 227181_adh  | AATGAGCGCATTGTATACACTG     | 23 | 1    | 21UR-1063 |
| 1886829_adh | TATACAGCTTAACTACCGATC      | 21 | 117  | 21UR-1079 |
| 612073_adh  | ATATACAGCTTAACTACCGATC     | 22 | 1    | 21UR-1079 |
| 207835_adh  | AATATACAGCTTAACTACCGATC    | 23 | 2    | 21UR-1079 |
| 1808508_adh | TACAACGTCGGTCAAACACAC      | 21 | 391  | 21UR-1087 |
| 1808509_adh | TACAACGTCGGTCAAACACACA     | 22 | 2    | 21UR-1087 |
| 2550670_adh | TTAATCTGAATGTCGTGATGA      | 21 | 262  | 21UR-1088 |
| 2550671_adh | TTAATCTGAATGTCGTGATGAT     | 22 | 1    | 21UR-1088 |
| 244101_adh  | AATTAATCTGAATGTCGTGATGA    | 23 | 1    | 21UR-1088 |
| 2491513_adh | TGTATGAAAACGTGCCGTCTT      | 21 | 70   | 21UR-1091 |
| 240875_adh  | AATGTATGAAAACGTGCCGTCTT    | 23 | 1    | 21UR-1091 |
| 1899008_adh | TATCGTTGGGTAGACCATGGT      | 21 | 2129 | 21UR-1122 |
| 1899013_adh | TATCGTTGGGTAGACCATGGTT     | 22 | 4    | 21UR-1122 |
| 614928_adh  | ATATCGTTGGGTAGACCATGGT     | 22 | 1    | 21UR-1122 |
| 208331_adh  | AATATCGTTGGGTAGACCATGGT    | 23 | 30   | 21UR-1122 |
| 1899017_adh | TATCGTTGGGTAGACCATGGTTTT   | 24 | 2    | 21UR-1122 |
| 1772802_adh | TAAC TTGTTGAATTTCCGAAT     | 21 | 19   | 21UR-1124 |
| 200269_adh  | AATAACTTGTGAAATTTCCGAAT    | 23 | 1    | 21UR-1124 |
| 2420917_adh | TGGGAATGTGAAATTTTTCAG      | 21 | 116  | 21UR-1125 |
| 2420920_adh | TGGGAATGTGAAATTTTTCAGG     | 22 | 1    | 21UR-1125 |
| 2485685_adh | TGTAATTGGAAGAATCGTTGC      | 21 | 218  | 21UR-1130 |
| 2485687_adh | TGTAATTGGAAGAATCGTTGCGAT   | 24 | 1    | 21UR-1130 |
| 1919699_adh | TATGTTTGGAAAAACCGTTG       | 21 | 289  | 21UR-1134 |
| 1919700_adh | TATGTTTGGAAAAACCGTTGAA     | 23 | 1    | 21UR-1134 |
| 1919701_adh | TATGTTTGGAAAAACCGTTGAAG    | 24 | 1    | 21UR-1134 |
| 2476654_adh | TGGTTGGATTGTCGCAGTCGG      | 21 | 1468 | 21UR-1146 |
| 2476667_adh | TGGTTGGATTGTCGCAGTCGGT     | 22 | 49   | 21UR-1146 |
| 2476675_adh | TGGTTGGATTGTCGCAGTCGGTT    | 23 | 6    | 21UR-1146 |
| 1795056_adh | TAATAGGATTTTTTCGGGGGAA     | 21 | 119  | 21UR-1147 |
| 1795057_adh | TAATAGGATTTTTTCGGGGGAAT    | 22 | 3    | 21UR-1147 |
| 2482741_adh | TGTAATAAGTGGAGGTAGCTA      | 21 | 3818 | 21UR-1166 |
| 2482742_adh | TGTAATAAGTGGAGGTAGCTAA     | 22 | 1    | 21UR-1166 |
| 693686_adh  | ATGTAATAAGTGGAGGTAGCTA     | 22 | 1    | 21UR-1166 |
| 2482743_adh | TGTAATAAGTGGAGGTAGCTAAA    | 23 | 2    | 21UR-1166 |
| 2482744_adh | TGTAATAAGTGGAGGTAGCTAAAC   | 24 | 1    | 21UR-1166 |
| 2482745_adh | TGTAATAAGTGGAGGTAGCTAAACA  | 25 | 1    | 21UR-1166 |
| 2482746_adh | TGTAATAAGTGGAGGTAGCTAAACAT | 26 | 1    | 21UR-1166 |
| 2051841_adh | TCTGTACGAAGAATGTTGTT       | 21 | 2249 | 21UR-1167 |
| 2051845_adh | TCTGTACGAAGAATGTTGTTT      | 22 | 2    | 21UR-1167 |

|             |                            |    |       |           |
|-------------|----------------------------|----|-------|-----------|
| 2051849_adh | TCTGTACGAAGAATGGTTGTTTT    | 23 | 1     | 21UR-1167 |
| 2567673_adh | TTAGGACATAATATGATCTTA      | 21 | 111   | 21UR-1190 |
| 2567674_adh | TTAGGACATAATATGATCTTAA     | 22 | 4     | 21UR-1190 |
| 1968147_adh | TCATAACAAACTGGGCATAAA      | 21 | 272   | 21UR-1193 |
| 1968150_adh | TCATAACAAACTGGGCATAAAATTAT | 26 | 1     | 21UR-1193 |
| 1997260_adh | TCGAATCAACTTGATCAAATC      | 21 | 4     | 21UR-1194 |
| 1997261_adh | TCGAATCAACTTGATCAAATCT     | 22 | 1     | 21UR-1194 |
| 670630_adh  | ATGATTCCGCAATAAGGCCTTG     | 22 | 1     | 21UR-1198 |
| 2123549_adh | TGAACGGCTTTTTTCTGATGG      | 21 | 7234  | 21UR-1200 |
| 2123552_adh | TGAACGGCTTTTTTCTGATGGG     | 22 | 1     | 21UR-1200 |
| 2123555_adh | TGAACGGCTTTTTTCTGATGGGGACT | 26 | 1     | 21UR-1200 |
| 1775715_adh | TAAGACGGCCAAATTATTTTC      | 21 | 135   | 21UR-1205 |
| 1775716_adh | TAAGACGGCCAAATTATTTTCT     | 22 | 1     | 21UR-1205 |
| 1761434_adh | TAAATGATAAGTTAGACCACA      | 21 | 306   | 21UR-1213 |
| 1761435_adh | TAAATGATAAGTTAGACCACAA     | 22 | 1     | 21UR-1213 |
| 1761436_adh | TAAATGATAAGTTAGACCACAACAAG | 26 | 1     | 21UR-1213 |
| 2620064_adh | TTCTGTCTCCCAAGCCAAGTA      | 21 | 23    | 21UR-1215 |
| 722082_adh  | ATTCTGTCTCCCAAGCCAAGTA     | 22 | 1     | 21UR-1215 |
| 1893946_adh | TATCATCAGGTTGAAGATTTG      | 21 | 631   | 21UR-1217 |
| 1893948_adh | TATCATCAGGTTGAAGATTTGG     | 22 | 1     | 21UR-1217 |
| 1893949_adh | TATCATCAGGTTGAAGATTTGGGT   | 24 | 2     | 21UR-1217 |
| 1893950_adh | TATCATCAGGTTGAAGATTTGGGTC  | 25 | 2     | 21UR-1217 |
| 1897448_adh | TATCGCTAAGCTTTTTCTGAA      | 21 | 53    | 21UR-1233 |
| 1897449_adh | TATCGCTAAGCTTTTTCTGAAA     | 23 | 1     | 21UR-1233 |
| 2137552_adh | TGAATACAATCAATGTTGACG      | 21 | 259   | 21UR-1251 |
| 662808_adh  | ATGAATACAATCAATGTTGACG     | 22 | 2     | 21UR-1251 |
| 224802_adh  | AATGAATACAATCAATGTTGACG    | 23 | 1     | 21UR-1251 |
| 1932360_adh | TCAAAAATAAACACAATTCTGG     | 21 | 1     | 21UR-1255 |
| 1932361_adh | TCAAAAATAAACACAATTCTGGC    | 22 | 2     | 21UR-1255 |
| 1829455_adh | TACTAATGTGTTGTAGGGTAA      | 21 | 146   | 21UR-1257 |
| 1829456_adh | TACTAATGTGTTGTAGGGTAAAA    | 23 | 1     | 21UR-1257 |
| 1846534_adh | TAGACTTGAGTTAGAACGGTT      | 21 | 72024 | 21UR-1258 |
| 1846535_adh | TAGACTTGAGTTAGAACGGTTA     | 22 | 6     | 21UR-1258 |
| 602877_adh  | ATAGACTTGAGTTAGAACGGTT     | 22 | 2     | 21UR-1258 |
| 1846536_adh | TAGACTTGAGTTAGAACGGTTAA    | 23 | 11    | 21UR-1258 |
| 1846538_adh | TAGACTTGAGTTAGAACGGTTAAT   | 24 | 22    | 21UR-1258 |
| 1846540_adh | TAGACTTGAGTTAGAACGGTTAATT  | 25 | 5     | 21UR-1258 |
| 1760845_adh | TAAATCGGTCATATAAGATAA      | 21 | 1479  | 21UR-1285 |
| 1760846_adh | TAAATCGGTCATATAAGATAAA     | 22 | 1     | 21UR-1285 |
| 1760847_adh | TAAATCGGTCATATAAGATAAAG    | 23 | 1     | 21UR-1285 |
| 199436_adh  | AATAAATCGGTCATATAAGATAA    | 23 | 2     | 21UR-1285 |
| 2572966_adh | TTAGTTGTCCATACGTTTCTC      | 21 | 85    | 21UR-1290 |
| 245150_adh  | AATTAGTTGTCCATACGTTTCTC    | 23 | 1     | 21UR-1290 |
| 2572967_adh | TTAGTTGTCCATACGTTTCTCAC    | 23 | 1     | 21UR-1290 |
| 1895455_adh | TATCCAGAAAAAGTTCAGTTT      | 21 | 22    | 21UR-1300 |
| 208149_adh  | AATATCCAGAAAAAGTTCAGTTT    | 23 | 1     | 21UR-1300 |
| 2635427_adh | TTGACCGAAGATTTTGAGAAC      | 21 | 281   | 21UR-1312 |
| 1108937_adh | CTTGACCGAAGATTTTGAGAAC     | 22 | 1     | 21UR-1312 |
| 2635428_adh | TTGACCGAAGATTTTGAGAACA     | 22 | 1     | 21UR-1312 |
| 2635429_adh | TTGACCGAAGATTTTGAGAACAA    | 23 | 1     | 21UR-1312 |

|             |                            |    |      |           |
|-------------|----------------------------|----|------|-----------|
| 1987668_adh | TCCGTAGCAGATATTTATCGT      | 21 | 312  | 21UR-1317 |
| 1987672_adh | TCCGTAGCAGATATTTATCGTTGA   | 24 | 1    | 21UR-1317 |
| 2422406_adh | TGGGACTTCCTAAACGGTTTT      | 21 | 362  | 21UR-1330 |
| 2422407_adh | TGGGACTTCCTAAACGGTTTTAT    | 23 | 1    | 21UR-1330 |
| 1956987_adh | TCAGAAATACTTCATGAGCAA      | 21 | 103  | 21UR-1336 |
| 1956989_adh | TCAGAAATACTTCATGAGCAAG     | 22 | 1    | 21UR-1336 |
| 1956990_adh | TCAGAAATACTTCATGAGCAAGACA  | 25 | 1    | 21UR-1336 |
| 1890431_adh | TATATGTAACATCCACCGG        | 21 | 47   | 21UR-1339 |
| 1890432_adh | TATATGTAACATCCACCGGAG      | 23 | 1    | 21UR-1339 |
| 2132447_adh | TGAAGGAAGAGTACGAAACTT      | 21 | 3028 | 21UR-1343 |
| 2132449_adh | TGAAGGAAGAGTACGAAACTTT     | 22 | 5    | 21UR-1343 |
| 224612_adh  | AATGAAGGAAGAGTACGAAACTT    | 23 | 7    | 21UR-1343 |
| 224613_adh  | AATGAAGGAAGAGTACGAAACTTT   | 24 | 1    | 21UR-1343 |
| 2132453_adh | TGAAGGAAGAGTACGAAACTTTTGT  | 25 | 3    | 21UR-1343 |
| 1923753_adh | TATTCATAGTTTAAAGAGCAAT     | 21 | 35   | 21UR-1349 |
| 1923754_adh | TATTCATAGTTTAAAGAGCAATA    | 22 | 1    | 21UR-1349 |
| 1886800_adh | TATACAGAAGACGTCTTGTTA      | 21 | 308  | 21UR-1352 |
| 207830_adh  | AATATACAGAAGACGTCTTGTTA    | 23 | 1    | 21UR-1352 |
| 2073748_adh | TGAAACTCTACTTTCAGGAGG      | 21 | 148  | 21UR-1355 |
| 2073749_adh | TGAAACTCTACTTTCAGGAGGA     | 22 | 1    | 21UR-1355 |
| 2073751_adh | TGAAACTCTACTTTCAGGAGGAC    | 23 | 1    | 21UR-1355 |
| 2617040_adh | TTCTCTCAGCCTACGACCAAA      | 21 | 146  | 21UR-1360 |
| 2617041_adh | TTCTCTCAGCCTACGACCAAAA     | 22 | 1    | 21UR-1360 |
| 248862_adh  | AATTCTCTCAGCCTACGACCAAA    | 23 | 1    | 21UR-1360 |
| 2013652_adh | TCGGATATTAGCAAACATTA       | 21 | 353  | 21UR-1372 |
| 2013653_adh | TCGGATATTAGCAAACATTA       | 22 | 2    | 21UR-1372 |
| 2013654_adh | TCGGATATTAGCAAACATTA       | 23 | 1    | 21UR-1372 |
| 2013655_adh | TCGGATATTAGCAAACATTA       | 25 | 2    | 21UR-1372 |
| 1841352_adh | TAGAATCGGATTATTTATTAT      | 21 | 133  | 21UR-1375 |
| 205546_adh  | AATAGAATCGGATTATTTATTAT    | 23 | 1    | 21UR-1375 |
| 2626853_adh | TTGAACTGGTCGCTGTGATGG      | 21 | 1374 | 21UR-1404 |
| 2626854_adh | TTGAACTGGTCGCTGTGATGGA     | 22 | 6    | 21UR-1404 |
| 723641_adh  | ATTGAACTGGTCGCTGTGATGG     | 22 | 1    | 21UR-1404 |
| 2626855_adh | TTGAACTGGTCGCTGTGATGGAAT   | 24 | 2    | 21UR-1404 |
| 2626856_adh | TTGAACTGGTCGCTGTGATGGAATT  | 25 | 1    | 21UR-1404 |
| 1814098_adh | TACATTAATATTGTTTCGGAAA     | 21 | 1307 | 21UR-1415 |
| 1814099_adh | TACATTAATATTGTTTCGGAAAA    | 23 | 1    | 21UR-1415 |
| 2665203_adh | TTGGCACTCGCGAACACCGCG      | 21 | 1    | 21UR-1430 |
| 1114195_adh | CTTGGCACTCGCGAACACCGCG     | 22 | 369  | 21UR-1430 |
| 1114196_adh | CTTGGCACTCGCGAACACCGCGA    | 23 | 16   | 21UR-1430 |
| 1972216_adh | TCATGCACGGCTAAAAATTTTC     | 21 | 242  | 21UR-1442 |
| 1972217_adh | TCATGCACGGCTAAAAATTTCT     | 22 | 2    | 21UR-1442 |
| 1813182_adh | TACATAGGAATCGAAATATGC      | 21 | 16   | 21UR-1465 |
| 203207_adh  | AATACATAGGAATCGAAATATGC    | 23 | 1    | 21UR-1465 |
| 2472196_adh | TGGTGGATCGTCATTTGGTGG      | 21 | 187  | 21UR-1475 |
| 2472199_adh | TGGTGGATCGTCATTTGGTGGT     | 22 | 1    | 21UR-1475 |
| 2472200_adh | TGGTGGATCGTCATTTGGTGGTA    | 23 | 2    | 21UR-1475 |
| 2472201_adh | TGGTGGATCGTCATTTGGTGGTAGT  | 25 | 2    | 21UR-1475 |
| 2671195_adh | TTGGTGGATCGTCATTTGGTGGTAGT | 26 | 1    | 21UR-1475 |
| 1917496_adh | TATGTACGTAACAACACACTG      | 21 | 41   | 21UR-1479 |

|             |                            |    |      |           |
|-------------|----------------------------|----|------|-----------|
| 208763_adh  | AATATGTACGTAACAACACACTG    | 23 | 1    | 21UR-1479 |
| 1941311_adh | TCAATCACGGTATTTATTTTG      | 21 | 104  | 21UR-1483 |
| 210484_adh  | AATCAATCACGGTATTTATTTTG    | 23 | 2    | 21UR-1483 |
| 2289539_adh | TGCAGTTTTTGATGACAGCAA      | 21 | 36   | 21UR-1489 |
| 1071421_adh | CTGCAGTTTTTGATGACAGCAA     | 22 | 1    | 21UR-1489 |
| 1885898_adh | TATAATGAGATTTGACTTTGT      | 21 | 23   | 21UR-1498 |
| 611968_adh  | ATATAATGAGATTTGACTTTGT     | 22 | 1    | 21UR-1498 |
| 2136911_adh | TGAATAATAGAAAATGCTGGC      | 21 | 3111 | 21UR-1511 |
| 2136912_adh | TGAATAATAGAAAATGCTGGCA     | 22 | 8    | 21UR-1511 |
| 2136913_adh | TGAATAATAGAAAATGCTGGCAA    | 23 | 7    | 21UR-1511 |
| 2136914_adh | TGAATAATAGAAAATGCTGGCAAA   | 24 | 2    | 21UR-1511 |
| 2136915_adh | TGAATAATAGAAAATGCTGGCAAAA  | 25 | 1    | 21UR-1511 |
| 2004792_adh | TCGATTCGTATAATGCAGAAA      | 21 | 1260 | 21UR-1517 |
| 2004795_adh | TCGATTCGTATAATGCAGAAAT     | 22 | 3    | 21UR-1517 |
| 2719544_adh | TTTGATGTTGCGTGAAGCATA      | 21 | 5    | 21UR-1531 |
| 742961_adh  | ATTTGATGTTGCGTGAAGCATA     | 22 | 1    | 21UR-1531 |
| 2611766_adh | TTCGTATGTTGAGTTAATGGC      | 21 | 1313 | 21UR-1545 |
| 1105099_adh | CTTCGTATGTTGAGTTAATGGC     | 22 | 1    | 21UR-1545 |
| 2611768_adh | TTCGTATGTTGAGTTAATGGCGA    | 23 | 1    | 21UR-1545 |
| 2611769_adh | TTCGTATGTTGAGTTAATGGCGAAT  | 25 | 1    | 21UR-1545 |
| 1827323_adh | TACGGTCGATCTTGTTTTAGG      | 21 | 131  | 21UR-1547 |
| 1827324_adh | TACGGTCGATCTTGTTTTAGGAA    | 23 | 1    | 21UR-1547 |
| 1811771_adh | TACAGAAGTGGACGTATTTAG      | 21 | 546  | 21UR-1556 |
| 1030062_adh | CTACAGAAGTGGACGTATTTAG     | 22 | 2    | 21UR-1556 |
| 1811773_adh | TACAGAAGTGGACGTATTTAGGTAGA | 26 | 1    | 21UR-1556 |
| 1806460_adh | TACAAAACCCAAAACCTTTTGA     | 21 | 68   | 21UR-1560 |
| 1806461_adh | TACAAAACCCAAAACCTTTTGAA    | 22 | 4    | 21UR-1560 |
| 2272715_adh | TGATGGGTAGTTGATTTTGGT      | 21 | 1622 | 21UR-1585 |
| 2272717_adh | TGATGGGTAGTTGATTTTGGTT     | 22 | 4    | 21UR-1585 |
| 2272721_adh | TGATGGGTAGTTGATTTTGGTTT    | 23 | 2    | 21UR-1585 |
| 2308567_adh | TGCTGATTGAACATTTCAAAA      | 21 | 103  | 21UR-1587 |
| 231086_adh  | AATGCTGATTGAACATTTCAAAA    | 23 | 1    | 21UR-1587 |
| 1768621_adh | TAACGCTTGTGAACGCATGAT      | 21 | 73   | 21UR-1594 |
| 1768624_adh | TAACGCTTGTGAACGCATGATT     | 22 | 1    | 21UR-1594 |
| 200072_adh  | AATAACGCTTGTGAACGCATGAT    | 23 | 1    | 21UR-1594 |
| 1838883_adh | TAGAACTTCTCAAAAAATAAC      | 21 | 32   | 21UR-1595 |
| 1838884_adh | TAGAACTTCTCAAAAAATAACA     | 22 | 1    | 21UR-1595 |
| 1850317_adh | TAGATAGGCAGAAATTTGATG      | 21 | 1608 | 21UR-1598 |
| 1850318_adh | TAGATAGGCAGAAATTTGATGA     | 22 | 13   | 21UR-1598 |
| 1850319_adh | TAGATAGGCAGAAATTTGATGAA    | 23 | 2    | 21UR-1598 |
| 1921734_adh | TATTAGTAGGTCAGCTTTGAA      | 21 | 39   | 21UR-1604 |
| 1921735_adh | TATTAGTAGGTCAGCTTTGAAA     | 22 | 1    | 21UR-1604 |
| 2081003_adh | TGAAAGCAGAGGTGGGCGGAT      | 21 | 135  | 21UR-1611 |
| 2081004_adh | TGAAAGCAGAGGTGGGCGGATA     | 22 | 1    | 21UR-1611 |
| 2081006_adh | TGAAAGCAGAGGTGGGCGGATAT    | 23 | 1    | 21UR-1611 |
| 2665540_adh | TTGGCCGTACGTAATATGAAT      | 21 | 398  | 21UR-1618 |
| 731569_adh  | ATTGGCCGTACGTAATATGAAT     | 22 | 1    | 21UR-1618 |
| 1913528_adh | TATGAAAATGCGGTTATTTGA      | 21 | 1504 | 21UR-1623 |
| 1913529_adh | TATGAAAATGCGGTTATTTGAA     | 22 | 7    | 21UR-1623 |
| 1913531_adh | TATGAAAATGCGGTTATTTGAAT    | 23 | 6    | 21UR-1623 |

|             |                            |    |      |           |
|-------------|----------------------------|----|------|-----------|
| 1913532_adh | TATGGAAATGCGGTTATTTGAATAG  | 25 | 1    | 21UR-1623 |
| 1913533_adh | TATGGAAATGCGGTTATTTGAATAGT | 26 | 4    | 21UR-1623 |
| 1956718_adh | TCAGAAAAGGTGTTGTACAAC      | 21 | 341  | 21UR-1634 |
| 1956719_adh | TCAGAAAAGGTGTTGTACAACA     | 22 | 1    | 21UR-1634 |
| 2489490_adh | TGTAGTAGCATCTTATTTCAA      | 21 | 114  | 21UR-1642 |
| 240769_adh  | AATGTAGTAGCATCTTATTTCAAAAT | 26 | 1    | 21UR-1642 |
| 1845344_adh | TAGACGATTGGTTCAATTTGC      | 21 | 33   | 21UR-1649 |
| 1845345_adh | TAGACGATTGGTTCAATTTGCAA    | 23 | 1    | 21UR-1649 |
| 1758921_adh | TAAAGTCGTGATGACAAATGA      | 21 | 69   | 21UR-1668 |
| 1758922_adh | TAAAGTCGTGATGACAAATGAA     | 22 | 1    | 21UR-1668 |
| 1976216_adh | TCCAAGAGTCAATGATTCGTT      | 21 | 4    | 21UR-1683 |
| 214673_adh  | AATCCAAGAGTCAATGATTCGTT    | 23 | 1    | 21UR-1683 |
| 2532110_adh | TGTTTCAACTCTACGGTGCCT      | 21 | 371  | 21UR-1684 |
| 2532111_adh | TGTTTCAACTCTACGGTGCCTAA    | 23 | 1    | 21UR-1684 |
| 1925738_adh | TATTGACTATGAGATCTGAAC      | 21 | 33   | 21UR-1694 |
| 1925739_adh | TATTGACTATGAGATCTGAACA     | 22 | 2    | 21UR-1694 |
| 1925740_adh | TATTGACTATGAGATCTGAACAA    | 23 | 3    | 21UR-1694 |
| 2460129_adh | TGGGTTGTCGATATTCGCAGG      | 21 | 36   | 21UR-1702 |
| 2460130_adh | TGGGTTGTCGATATTCGCAGGA     | 22 | 1    | 21UR-1702 |
| 2460131_adh | TGGGTTGTCGATATTCGCAGGAA    | 23 | 2    | 21UR-1702 |
| 1895737_adh | TATCCGCGTCTGTACATGCGAGAC   | 25 | 1    | 21UR-1712 |
| 1836448_adh | TACTTTTGTGCGTGA AAATATG    | 21 | 86   | 21UR-1719 |
| 601257_adh  | ATACTTTTGTGCGTGA AAATATG   | 22 | 1    | 21UR-1719 |
| 205328_adh  | AATACTTTTGTGCGTGA AAATATG  | 23 | 1    | 21UR-1719 |
| 2596705_adh | TTCCAGACACACAGAAGGAAG      | 21 | 113  | 21UR-1746 |
| 2596706_adh | TTCCAGACACACAGAAGGAAGT     | 22 | 1    | 21UR-1746 |
| 1813797_adh | TACATGCCATCGACGGCCATC      | 21 | 120  | 21UR-1749 |
| 1813798_adh | TACATGCCATCGACGGCCATCA     | 22 | 1    | 21UR-1749 |
| 1825414_adh | TACGCTGGTAGAAAGAAAAAA      | 21 | 1550 | 21UR-1790 |
| 1031107_adh | CTACGCTGGTAGAAAGAAAAAA     | 22 | 1    | 21UR-1790 |
| 1808128_adh | TACAACGTAGAGTACTGAACT      | 21 | 108  | 21UR-1793 |
| 1808129_adh | TACAACGTAGAGTACTGAACTAAT   | 24 | 1    | 21UR-1793 |
| 1799258_adh | TAATGAACTGACAAAATTTGT      | 21 | 6    | 21UR-1794 |
| 589508_adh  | ATAATGAACTGACAAAATTTGT     | 22 | 1    | 21UR-1794 |
| 2742302_adh | TTTTGCAGTTGCTGGAAATGG      | 21 | 516  | 21UR-1800 |
| 2742303_adh | TTTTGCAGTTGCTGGAAATGGA     | 22 | 1    | 21UR-1800 |
| 2742304_adh | TTTTGCAGTTGCTGGAAATGGAT    | 23 | 1    | 21UR-1800 |
| 2698490_adh | TTTATCCACACGGCTATCAGT      | 21 | 167  | 21UR-1821 |
| 255001_adh  | AATTTATCCACACGGCTATCAGT    | 23 | 1    | 21UR-1821 |
| 2680597_adh | TTGTGAGGACAGTGGCATGGG      | 21 | 136  | 21UR-1824 |
| 2680599_adh | TTGTGAGGACAGTGGCATGGGC     | 22 | 2    | 21UR-1824 |
| 1928683_adh | TATTGTTTGTGGAAGCGTGAG      | 21 | 6953 | 21UR-1825 |
| 1928685_adh | TATTGTTTGTGGAAGCGTGAGC     | 22 | 27   | 21UR-1825 |
| 209387_adh  | AATATTGTTTGTGGAAGCGTGAG    | 23 | 1    | 21UR-1825 |
| 2689710_adh | TTTAACAAATGACGGTAAATC      | 21 | 552  | 21UR-1832 |
| 2689711_adh | TTTAACAAATGACGGTAAATCT     | 22 | 1    | 21UR-1832 |
| 2689712_adh | TTTAACAAATGACGGTAAATCTAATC | 26 | 1    | 21UR-1832 |
| 2502236_adh | TGTGAAGCGAGATTGTTCAAC      | 21 | 2185 | 21UR-1833 |
| 2502237_adh | TGTGAAGCGAGATTGTTCAACA     | 22 | 2    | 21UR-1833 |
| 242153_adh  | AATGTGAAGCGAGATTGTTCAAC    | 23 | 3    | 21UR-1833 |

|             |                            |    |      |           |
|-------------|----------------------------|----|------|-----------|
| 2502238_adh | TGTGAAGCGAGATTGTTCAACAA    | 23 | 2    | 21UR-1833 |
| 2502239_adh | TGTGAAGCGAGATTGTTCAACAAA   | 24 | 1    | 21UR-1833 |
| 2683988_adh | TTGTTCTTCGTTCCGGTCCAAA     | 21 | 4072 | 21UR-1838 |
| 1118902_adh | CTTGTTCTTCGTTCCGGTCCAAA    | 22 | 1    | 21UR-1838 |
| 1758000_adh | TAAAGGCAGAATTTTATCAAC      | 21 | 1646 | 21UR-1848 |
| 1758001_adh | TAAAGGCAGAATTTTATCAACA     | 22 | 5    | 21UR-1848 |
| 1758002_adh | TAAAGGCAGAATTTTATCAACAA    | 23 | 4    | 21UR-1848 |
| 1758003_adh | TAAAGGCAGAATTTTATCAACAAAA  | 26 | 2    | 21UR-1848 |
| 2302361_adh | TGCGGTAGATAAAGAAGTACT      | 21 | 670  | 21UR-1850 |
| 2302369_adh | TGCGGTAGATAAAGAAGTACTT     | 22 | 2    | 21UR-1850 |
| 230648_adh  | AATGCGGTAGATAAAGAAGTACT    | 23 | 1    | 21UR-1850 |
| 2304594_adh | TGCGTTGAAGACTACTCCTGA      | 21 | 609  | 21UR-1861 |
| 2304595_adh | TGCGTTGAAGACTACTCCTGAA     | 22 | 15   | 21UR-1861 |
| 2304596_adh | TGCGTTGAAGACTACTCCTGAAA    | 23 | 18   | 21UR-1861 |
| 2304597_adh | TGCGTTGAAGACTACTCCTGAAAA   | 24 | 3    | 21UR-1861 |
| 1942418_adh | TCAATGTACTCGTTGGTTTCT      | 21 | 651  | 21UR-1874 |
| 1043680_adh | CTCAATGTACTCGTTGGTTTCT     | 22 | 1    | 21UR-1874 |
| 1914299_adh | TATGGAGTCGGTATATTTTGA      | 21 | 631  | 21UR-1876 |
| 1914300_adh | TATGGAGTCGGTATATTTTGAA     | 22 | 4    | 21UR-1876 |
| 616846_adh  | ATATGGAGTCGGTATATTTTGA     | 22 | 1    | 21UR-1876 |
| 2554415_adh | TTACAGTATTGGTAAGGTGGA      | 21 | 91   | 21UR-1882 |
| 2554416_adh | TTACAGTATTGGTAAGGTGAAAGT   | 25 | 1    | 21UR-1882 |
| 2291205_adh | TGCATTGAAACGAACAACACTAC    | 21 | 63   | 21UR-1884 |
| 2291207_adh | TGCATTGAAACGAACAACACTACT   | 22 | 2    | 21UR-1884 |
| 2291208_adh | TGCATTGAAACGAACAACACTACTA  | 23 | 1    | 21UR-1884 |
| 1889632_adh | TATATAATTAAGAACATTGA       | 21 | 39   | 21UR-1892 |
| 1889633_adh | TATATAATTAAGAACATTGAA      | 22 | 3    | 21UR-1892 |
| 1837639_adh | TAGAAAGTTTGGACAATTTTT      | 21 | 14   | 21UR-1895 |
| 1837640_adh | TAGAAAGTTTGGACAATTTTTCGGTA | 26 | 1    | 21UR-1895 |
| 1869158_adh | TAGGGGCATGGTTTATTGAAC      | 21 | 531  | 21UR-1919 |
| 1035710_adh | CTAGGGGCATGGTTTATTGAAC     | 22 | 2    | 21UR-1919 |
| 1869159_adh | TAGGGGCATGGTTTATTGAACA     | 22 | 6    | 21UR-1919 |
| 330801_adh  | ACTAGGGGCATGGTTTATTGAACA   | 24 | 1    | 21UR-1919 |
| 1901668_adh | TATGAACTTCGTAAGAAAATA      | 21 | 9    | 21UR-1941 |
| 615378_adh  | ATATGAACTTCGTAAGAAAATA     | 22 | 1    | 21UR-1941 |
| 1940291_adh | TCAAGTCAGACAAATGTGCTT      | 21 | 3660 | 21UR-1943 |
| 1940293_adh | TCAAGTCAGACAAATGTGCTTC     | 22 | 1    | 21UR-1943 |
| 210429_adh  | AATCAAGTCAGACAAATGTGCTT    | 23 | 7    | 21UR-1943 |
| 1823439_adh | TACGAGGGTGACAAAGAATGG      | 21 | 1528 | 21UR-1949 |
| 1823440_adh | TACGAGGGTGACAAAGAATGGA     | 22 | 10   | 21UR-1949 |
| 1823441_adh | TACGAGGGTGACAAAGAATGGAA    | 23 | 5    | 21UR-1949 |
| 203994_adh  | AATACGAGGGTGACAAAGAATGG    | 23 | 3    | 21UR-1949 |
| 1823442_adh | TACGAGGGTGACAAAGAATGGAATT  | 25 | 1    | 21UR-1949 |
| 2672100_adh | TTGGTTCCTGCTATTAGAACC      | 21 | 432  | 21UR-1956 |
| 732928_adh  | ATTGGTTCCTGCTATTAGAACC     | 22 | 2    | 21UR-1956 |
| 253216_adh  | AATTGGTTCCTGCTATTAGAACC    | 23 | 3    | 21UR-1956 |
| 2313216_adh | TGGA AAAATCCTGCATTGTAA     | 21 | 64   | 21UR-1960 |
| 678600_adh  | ATGGA AAAATCCTGCATTGTAA    | 22 | 1    | 21UR-1960 |
| 231542_adh  | AATGGA AAAATCCTGCATTGTAA   | 23 | 2    | 21UR-1960 |
| 1893092_adh | TATCACTCCATTGAAATATTG      | 21 | 14   | 21UR-1995 |

|             |                            |    |      |           |
|-------------|----------------------------|----|------|-----------|
| 613448_adh  | ATATCACTCCATTGAAATATTG     | 22 | 1    | 21UR-1995 |
| 2304533_adh | TGCGTTCTGTATTGTATACCG      | 21 | 226  | 21UR-2000 |
| 676836_adh  | ATGCGTTCTGTATTGTATACCG     | 22 | 3    | 21UR-2000 |
| 2304534_adh | TGCGTTCTGTATTGTATACCGAA    | 23 | 2    | 21UR-2000 |
| 1872083_adh | TAGGTGTTGAAGAAAATTAAC      | 21 | 17   | 21UR-2008 |
| 1872084_adh | TAGGTGTTGAAGAAAATTAACGAT   | 24 | 1    | 21UR-2008 |
| 1946637_adh | TCACCAAGAATTCGGTACTC       | 21 | 2952 | 21UR-2014 |
| 625769_adh  | ATCACCAAGAATTCGGTACTC      | 22 | 2    | 21UR-2014 |
| 2031245_adh | TCTACAGAACACTATGGCGAG      | 21 | 472  | 21UR-2055 |
| 2031250_adh | TCTACAGAACACTATGGCGAGT     | 22 | 2    | 21UR-2055 |
| 651580_adh  | ATCTACAGAACACTATGGCGAG     | 22 | 1    | 21UR-2055 |
| 2031253_adh | TCTACAGAACACTATGGCGAGTT    | 23 | 1    | 21UR-2055 |
| 221316_adh  | AATCTACAGAACACTATGGCGAG    | 23 | 2    | 21UR-2055 |
| 1945571_adh | TCACATACAAGGCGCGGCTTA      | 21 | 278  | 21UR-2061 |
| 625670_adh  | ATCACATACAAGGCGCGGCTTA     | 22 | 1    | 21UR-2061 |
| 212500_adh  | AATCACATACAAGGCGCGGCTTA    | 23 | 2    | 21UR-2061 |
| 2269721_adh | TGATCCTTTTGCAATTGACGA      | 21 | 112  | 21UR-2062 |
| 228011_adh  | AATGATCCTTTTGCAATTGACGA    | 23 | 1    | 21UR-2062 |
| 1800825_adh | TAATGGTGTTGCCAGAAGATA      | 21 | 19   | 21UR-2063 |
| 589999_adh  | ATAATGGTGTTGCCAGAAGATA     | 22 | 1    | 21UR-2063 |
| 1761035_adh | TAAATCTATTGAAGAGGACTG      | 21 | 691  | 21UR-2070 |
| 199452_adh  | AATAAATCTATTGAAGAGGACTG    | 23 | 2    | 21UR-2070 |
| 1967490_adh | TCAGTTGAGTTGAAAAAAGGT      | 21 | 87   | 21UR-2091 |
| 1967491_adh | TCAGTTGAGTTGAAAAAAGGTT     | 22 | 1    | 21UR-2091 |
| 2701676_adh | TTTCAATATCATTTTTGAGTC      | 21 | 1    | 21UR-2094 |
| 255136_adh  | AATTTCAATATCATTTTTGAGTC    | 23 | 1    | 21UR-2094 |
| 2450000_adh | TGGGCAGGTATTAATTTCGAGT     | 21 | 489  | 21UR-2102 |
| 2450002_adh | TGGGCAGGTATTAATTTCGAGTT    | 22 | 1    | 21UR-2102 |
| 1852894_adh | TAGCAAATCTGTAAATTTTGC      | 21 | 60   | 21UR-2104 |
| 1852895_adh | TAGCAAATCTGTAAATTTTGCA     | 22 | 1    | 21UR-2104 |
| 2669825_adh | TTGGTAGGCGTCATTA AAAACC    | 21 | 332  | 21UR-2127 |
| 732363_adh  | ATTGGTAGGCGTCATTA AAAACC   | 22 | 1    | 21UR-2127 |
| 253029_adh  | AATTGGTAGGCGTCATTA AAAACC  | 23 | 3    | 21UR-2127 |
| 2669827_adh | TTGGTAGGCGTCATTA AACCGAT   | 24 | 1    | 21UR-2127 |
| 1913819_adh | TATGGAATCGCACGGTG TAGA     | 21 | 194  | 21UR-2147 |
| 1913821_adh | TATGGAATCGCACGGTG TAGAT    | 22 | 1    | 21UR-2147 |
| 1973045_adh | TCATGTTATACTATTAGCATA      | 21 | 19   | 21UR-2148 |
| 214448_adh  | AATCATGTTATACTATTAGCATA    | 23 | 1    | 21UR-2148 |
| 1858958_adh | TAGCTTAGTTCTGTTACTCAT      | 21 | 20   | 21UR-2156 |
| 1858959_adh | TAGCTTAGTTCTGTTACTCATT     | 23 | 1    | 21UR-2156 |
| 2519062_adh | TGTGTATGTCGTCCCAAAAAA      | 21 | 81   | 21UR-2157 |
| 242664_adh  | AATGTGTATGTCGTCCCAAAAAA    | 23 | 1    | 21UR-2157 |
| 2725074_adh | TTTGGGTTTGTCGGCTATTGC      | 21 | 131  | 21UR-2161 |
| 2725075_adh | TTTGGGTTTGTCGGCTATTGCT     | 22 | 2    | 21UR-2161 |
| 2672970_adh | TTGGTTGTGTTTACAAATGTG      | 21 | 2    | 21UR-2163 |
| 574752_adh  | AGTTGGTTGTGTTTACAAATGTGCTG | 26 | 1    | 21UR-2163 |
| 1861542_adh | TAGGAATATAGCATTAAATAA      | 21 | 7176 | 21UR-2164 |
| 1861544_adh | TAGGAATATAGCATTAAATAAG     | 22 | 2    | 21UR-2164 |
| 1861545_adh | TAGGAATATAGCATTAAATAAGCAT  | 25 | 1    | 21UR-2164 |
| 1766436_adh | TAACATTGTCGTAGAGGAACA      | 21 | 226  | 21UR-2172 |

|             |                             |    |       |           |
|-------------|-----------------------------|----|-------|-----------|
| 1766437_adh | TAACATTGTCGTAGAGGAACAAAA    | 24 | 1     | 21UR-2172 |
| 1801630_adh | TAATGTCAGTTGAAAATGTGC       | 21 | 64    | 21UR-2173 |
| 1801631_adh | TAATGTCAGTTGAAAATGTGCA      | 22 | 1     | 21UR-2173 |
| 1874032_adh | TAGTACTGGCACTCTAGAGAA       | 21 | 141   | 21UR-2179 |
| 1874033_adh | TAGTACTGGCACTCTAGAGAAA      | 22 | 1     | 21UR-2179 |
| 1874034_adh | TAGTACTGGCACTCTAGAGAAAA     | 23 | 1     | 21UR-2179 |
| 1770978_adh | TAACTGACGATACGGCAATAT       | 21 | 1635  | 21UR-2187 |
| 584951_adh  | ATAACTGACGATACGGCAATAT      | 22 | 1     | 21UR-2187 |
| 200208_adh  | AATAACTGACGATACGGCAATAT     | 23 | 6     | 21UR-2187 |
| 1770980_adh | TAACTGACGATACGGCAATATCTGG   | 25 | 1     | 21UR-2187 |
| 2698943_adh | TTTATGACATGTTGGAGTTTT       | 21 | 1304  | 21UR-2200 |
| 2698945_adh | TTTATGACATGTTGGAGTTTTT      | 22 | 5     | 21UR-2200 |
| 1899393_adh | TATCTCACATCTATTATCATC       | 21 | 1     | 21UR-2206 |
| 1899394_adh | TATCTCACATCTATTATCATCA      | 22 | 1     | 21UR-2206 |
| 1812489_adh | TACAGGATCAGTGAAAGGTGA       | 21 | 296   | 21UR-2207 |
| 1812490_adh | TACAGGATCAGTGAAAGGTGAA      | 22 | 1     | 21UR-2207 |
| 1812492_adh | TACAGGATCAGTGAAAGGTGAAG     | 23 | 1     | 21UR-2207 |
| 1812493_adh | TACAGGATCAGTGAAAGGTGAAGT    | 24 | 1     | 21UR-2207 |
| 1812494_adh | TACAGGATCAGTGAAAGGTGAAGTG   | 25 | 1     | 21UR-2207 |
| 1850039_adh | TAGATAGAGACTGCATGATTT       | 21 | 15530 | 21UR-2235 |
| 1850044_adh | TAGATAGAGACTGCATGATTTT      | 22 | 18    | 21UR-2235 |
| 1850053_adh | TAGATAGAGACTGCATGATTTTT     | 23 | 3     | 21UR-2235 |
| 1850054_adh | TAGATAGAGACTGCATGATTTTTG    | 24 | 1     | 21UR-2235 |
| 1850055_adh | TAGATAGAGACTGCATGATTTTTGCT  | 26 | 1     | 21UR-2235 |
| 1970733_adh | TCATCCAAGGACAATGCGGAT       | 21 | 122   | 21UR-2236 |
| 1970735_adh | TCATCCAAGGACAATGCGGATT      | 22 | 1     | 21UR-2236 |
| 2309433_adh | TGCTGTCATGTTTCACTGGGT       | 21 | 14    | 21UR-2240 |
| 677952_adh  | ATGCTGTCATGTTTCACTGGGT      | 22 | 1     | 21UR-2240 |
| 1932172_adh | TCAAAGAAAGCTTGACGGCA        | 21 | 210   | 21UR-2243 |
| 209555_adh  | AATCAAAGAAAGCTTGACGGCA      | 23 | 1     | 21UR-2243 |
| 2073790_adh | TGAAACTCTTTTCTGATCGTC       | 21 | 16    | 21UR-2246 |
| 2073791_adh | TGAAACTCTTTTCTGATCGTCAA     | 23 | 1     | 21UR-2246 |
| 2545097_adh | TTAACATTTTTGGCATTITTCG      | 21 | 34    | 21UR-2261 |
| 2545098_adh | TTAACATTTTTGGCATTITTCGGACGA | 26 | 1     | 21UR-2261 |
| 1831936_adh | TACTGAAGAAGACGGACAAAG       | 21 | 3821  | 21UR-2268 |
| 1831939_adh | TACTGAAGAAGACGGACAAAGC      | 22 | 5     | 21UR-2268 |
| 1831940_adh | TACTGAAGAAGACGGACAAAGCC     | 23 | 1     | 21UR-2268 |
| 204644_adh  | AATACTGAAGAAGACGGACAAAG     | 23 | 2     | 21UR-2268 |
| 1812111_adh | TACAGATTCTGACAAAAATAA       | 21 | 108   | 21UR-2275 |
| 593108_adh  | ATACAGATTCTGACAAAAATAA      | 22 | 1     | 21UR-2275 |
| 2018774_adh | TCGGTCGTTGTGCATAAAGTT       | 21 | 73    | 21UR-2286 |
| 2018775_adh | TCGGTCGTTGTGCATAAAGTTTAA    | 24 | 1     | 21UR-2286 |
| 2018776_adh | TCGGTCGTTGTGCATAAAGTTTAAA   | 25 | 1     | 21UR-2286 |
| 2542617_adh | TTAAATCACCATTTATCGTCTC      | 21 | 362   | 21UR-2287 |
| 2542618_adh | TTAAATCACCATTTATCGTCTCAA    | 23 | 2     | 21UR-2287 |
| 1986659_adh | TCCGGGAGATTTAATTATCAC       | 21 | 3     | 21UR-2293 |
| 215646_adh  | AATCCGGGAGATTTAATTATCAC     | 23 | 1     | 21UR-2293 |
| 1854239_adh | TAGCACTCGGCATGTTTTTCT       | 21 | 2568  | 21UR-2305 |
| 1854240_adh | TAGCACTCGGCATGTTTTTCTAA     | 23 | 5     | 21UR-2305 |
| 2006292_adh | TCGCAGCTGAAAGATGTTTTG       | 21 | 3337  | 21UR-2308 |

|             |                           |    |       |           |
|-------------|---------------------------|----|-------|-----------|
| 2006293_adh | TCGCAGCTGAAAGATGTTTTGA    | 22 | 1     | 21UR-2308 |
| 2006294_adh | TCGCAGCTGAAAGATGTTTTGAA   | 23 | 15    | 21UR-2308 |
| 2284922_adh | TGCAATGTACAACAGGACAAT     | 21 | 421   | 21UR-2320 |
| 229169_adh  | AATGCAATGTACAACAGGACAAT   | 23 | 1     | 21UR-2320 |
| 1888201_adh | TATAGCACTCGTTTGGGCATT     | 21 | 499   | 21UR-2322 |
| 1888203_adh | TATAGCACTCGTTTGGGCATTT    | 22 | 1     | 21UR-2322 |
| 2138790_adh | TGAATAGGCTGGCTTGATGGA     | 21 | 1303  | 21UR-2324 |
| 2138791_adh | TGAATAGGCTGGCTTGATGGAA    | 22 | 3     | 21UR-2324 |
| 2138792_adh | TGAATAGGCTGGCTTGATGGAAA   | 23 | 6     | 21UR-2324 |
| 2138793_adh | TGAATAGGCTGGCTTGATGGAAAAT | 24 | 1     | 21UR-2324 |
| 1921286_adh | TATTAGAAGGAACGGCGGACA     | 21 | 2419  | 21UR-2325 |
| 1921288_adh | TATTAGAAGGAACGGCGGACAT    | 22 | 10    | 21UR-2325 |
| 619211_adh  | ATATTAGAAGGAACGGCGGACA    | 22 | 4     | 21UR-2325 |
| 1773947_adh | TAAGAACTGGCTTCTGTGTGG     | 21 | 51    | 21UR-2327 |
| 1773948_adh | TAAGAACTGGCTTCTGTGTGGA    | 22 | 1     | 21UR-2327 |
| 1773949_adh | TAAGAACTGGCTTCTGTGTGGAA   | 23 | 1     | 21UR-2327 |
| 200311_adh  | AATAAGAACTGGCTTCTGTGTGG   | 23 | 1     | 21UR-2327 |
| 1966988_adh | TCAGTGGATGTTAATTTCTGG     | 21 | 8     | 21UR-2330 |
| 1966989_adh | TCAGTGGATGTTAATTTCTGGA    | 22 | 1     | 21UR-2330 |
| 1843859_adh | TAGAATTCGTGATTACAAAAA     | 21 | 22    | 21UR-2343 |
| 1843860_adh | TAGAATTCGTGATTACAAAAA     | 22 | 1     | 21UR-2343 |
| 1843861_adh | TAGAATTCGTGATTACAAAAAAGTA | 25 | 1     | 21UR-2343 |
| 2268391_adh | TGATATTGCATATTTTGGTGC     | 21 | 139   | 21UR-2366 |
| 227929_adh  | AATGATATTGCATATTTTGGTGC   | 23 | 4     | 21UR-2366 |
| 2248625_adh | TGAGGTCTGCAACTTGTTCOA     | 21 | 424   | 21UR-2378 |
| 2248626_adh | TGAGGTCTGCAACTTGTTCOA     | 22 | 1     | 21UR-2378 |
| 227351_adh  | AATGAGGTCTGCAACTTGTTCOA   | 23 | 1     | 21UR-2378 |
| 1975142_adh | TCATTTCTGCTTTAGGCTAAA     | 21 | 381   | 21UR-2388 |
| 631513_adh  | ATCATTTCTGCTTTAGGCTAAA    | 22 | 1     | 21UR-2388 |
| 1988286_adh | TCCGTCGATTATTTTGCATA      | 21 | 343   | 21UR-2392 |
| 215748_adh  | AATCCGTCGATTATTTTGCATA    | 23 | 16    | 21UR-2392 |
| 2583131_adh | TTATTGGCATATTTTGCACAAT    | 21 | 657   | 21UR-2407 |
| 2583133_adh | TTATTGGCATATTTTGCACAAT    | 22 | 1     | 21UR-2407 |
| 245858_adh  | AATTATTGGCATATTTTGCACAAT  | 23 | 3     | 21UR-2407 |
| 1788156_adh | TAAGTCTTTGATGGTCATTTT     | 21 | 498   | 21UR-2422 |
| 1788157_adh | TAAGTCTTTGATGGTCATTTT     | 22 | 2     | 21UR-2422 |
| 200795_adh  | AATAAGTCTTTGATGGTCATTTT   | 23 | 6     | 21UR-2422 |
| 2648419_adh | TTGCAACTTTGGTGTGATAGT     | 21 | 25    | 21UR-2423 |
| 251228_adh  | AATTGCAACTTTGGTGTGATAGT   | 25 | 1     | 21UR-2423 |
| 1912733_adh | TATGCCCTTCACTGTGTGAAT     | 21 | 79    | 21UR-2433 |
| 1912734_adh | TATGCCCTTCACTGTGTGAAT     | 22 | 1     | 21UR-2433 |
| 2289704_adh | TGCATACAACGTTGCCGTATG     | 21 | 272   | 21UR-2436 |
| 673799_adh  | ATGCATACAACGTTGCCGTATG    | 22 | 1     | 21UR-2436 |
| 229498_adh  | AATGCATACAACGTTGCCGTATG   | 23 | 2     | 21UR-2436 |
| 1918915_adh | TATGTGAGAGAAAGTGACTCT     | 21 | 53    | 21UR-2444 |
| 618662_adh  | ATATGTGAGAGAAAGTGACTCT    | 22 | 1     | 21UR-2444 |
| 2162030_adh | TGACGTAAAAATACTTTCTAA     | 21 | 39    | 21UR-2449 |
| 226423_adh  | AATGACGTAAAAATACTTTCTAA   | 23 | 1     | 21UR-2449 |
| 2117138_adh | TGAAATTGTAGTAGACTGCTG     | 21 | 41347 | 21UR-2502 |
| 2117146_adh | TGAAATTGTAGTAGACTGCTG     | 22 | 55    | 21UR-2502 |

|             |                            |    |      |           |
|-------------|----------------------------|----|------|-----------|
| 2117147_adh | TGAAATTGTAGTAGACTGCTGCC    | 23 | 2    | 21UR-2502 |
| 224140_adh  | AATGAAATTGTAGTAGACTGCTG    | 23 | 6    | 21UR-2502 |
| 2117148_adh | TGAAATTGTAGTAGACTGCTGCCA   | 24 | 1    | 21UR-2502 |
| 2117149_adh | TGAAATTGTAGTAGACTGCTGCCAA  | 25 | 3    | 21UR-2502 |
| 1891155_adh | TATCAAACAGATGGCCCAAAA      | 21 | 58   | 21UR-2504 |
| 1891156_adh | TATCAAACAGATGGCCCAAAAT     | 22 | 1    | 21UR-2504 |
| 1860435_adh | TAGGAAAGCCCCACTATGCTG      | 21 | 2    | 21UR-2516 |
| 1860436_adh | TAGGAAAGCCCCACTATGCTGC     | 22 | 1    | 21UR-2516 |
| 2410137_adh | TGGCATTGCAAAATCTAGGGT      | 21 | 144  | 21UR-2523 |
| 2410138_adh | TGGCATTGCAAAATCTAGGGTGT    | 23 | 1    | 21UR-2523 |
| 1773724_adh | TAAGAACCCGTTAACAAGATC      | 21 | 7    | 21UR-2533 |
| 1773725_adh | TAAGAACCCGTTAACAAGATCGA    | 23 | 1    | 21UR-2533 |
| 2182153_adh | TGAGACAAGAAAGTTTTGGTT      | 21 | 4132 | 21UR-2543 |
| 2182156_adh | TGAGACAAGAAAGTTTTGGTTT     | 22 | 4    | 21UR-2543 |
| 2639623_adh | TTGAGACAAGAAAGTTTTGGTTT    | 23 | 1    | 21UR-2543 |
| 1760575_adh | TAAATCCATACCAGTAGGACA      | 21 | 281  | 21UR-2549 |
| 1760576_adh | TAAATCCATACCAGTAGGACAAAAA  | 25 | 1    | 21UR-2549 |
| 1845891_adh | TAGACTGATCTGACTGTAAGA      | 21 | 57   | 21UR-2555 |
| 1845892_adh | TAGACTGATCTGACTGTAAGAA     | 22 | 2    | 21UR-2555 |
| 2587195_adh | TTCAAGGAACCTAACGTTGGGA     | 21 | 1070 | 21UR-2572 |
| 2587198_adh | TTCAAGGAACCTAACGTTGGGAC    | 22 | 2    | 21UR-2572 |
| 711273_adh  | ATTCAAGGAACCTAACGTTGGGA    | 22 | 2    | 21UR-2572 |
| 246019_adh  | AATTCAAGGAACCTAACGTTGGGA   | 23 | 2    | 21UR-2572 |
| 2669863_adh | TTGGTAGGGAGGCAAACCTAGT     | 21 | 284  | 21UR-2582 |
| 253030_adh  | AATTGGTAGGGAGGCAAACCTAGT   | 23 | 1    | 21UR-2582 |
| 2478982_adh | TGGTTTTATAGTAGTAGGCTC      | 21 | 2756 | 21UR-2589 |
| 2478988_adh | TGGTTTTATAGTAGTAGGCTCT     | 22 | 2    | 21UR-2589 |
| 2478991_adh | TGGTTTTATAGTAGTAGGCTCTTATG | 26 | 1    | 21UR-2589 |
| 1847324_adh | TAGAGAATTTGTAGATGTCTC      | 21 | 585  | 21UR-2596 |
| 1847325_adh | TAGAGAATTTGTAGATGTCTCA     | 22 | 9    | 21UR-2596 |
| 1847327_adh | TAGAGAATTTGTAGATGTCTCAT    | 23 | 1    | 21UR-2596 |
| 2625919_adh | TTGAACACGGTTTCGGAATGT      | 21 | 34   | 21UR-2604 |
| 723275_adh  | ATTGAACACGGTTTCGGAATGT     | 22 | 1    | 21UR-2604 |
| 2082266_adh | TGAAAGGCCAAAATAAGGATAA     | 21 | 169  | 21UR-2621 |
| 659943_adh  | ATGAAAGGCCAAAATAAGGATAA    | 22 | 1    | 21UR-2621 |
| 1759752_adh | TAAATAGGTCGAACAAAAAAT      | 21 | 64   | 21UR-2625 |
| 1759753_adh | TAAATAGGTCGAACAAAAAATT     | 22 | 1    | 21UR-2625 |
| 1788185_adh | TAAGTCTTTTACTCCCGATTT      | 21 | 5    | 21UR-2628 |
| 200796_adh  | AATAAGTCTTTTACTCCCGATTT    | 23 | 1    | 21UR-2628 |
| 2012418_adh | TCGGAGAGTGCGTTTATGTTTT     | 21 | 29   | 21UR-2637 |
| 646266_adh  | ATCGGAGAGTGCGTTTATGTTTT    | 22 | 1    | 21UR-2637 |
| 1848270_adh | TAGAGGAATGATTATGTTAGC      | 21 | 174  | 21UR-2656 |
| 1848271_adh | TAGAGGAATGATTATGTTAGCA     | 22 | 1    | 21UR-2656 |
| 1939482_adh | TCAAGGAACCTAACGTTGGGAC     | 21 | 47   | 21UR-2657 |
| 1939483_adh | TCAAGGAACCTAACGTTGGGACA    | 22 | 1    | 21UR-2657 |
| 2610856_adh | TTCGGTTTCTCCATACAAATT      | 21 | 173  | 21UR-2663 |
| 2610858_adh | TTCGGTTTCTCCATACAAATTT     | 22 | 1    | 21UR-2663 |
| 718867_adh  | ATTCGGTTTCTCCATACAAATT     | 22 | 1    | 21UR-2663 |
| 1829027_adh | TACGTTGACTTTGTGCAGTGA      | 21 | 277  | 21UR-2674 |
| 1829033_adh | TACGTTGACTTTGTGCAGTGATG    | 23 | 1    | 21UR-2674 |

|             |                            |    |      |           |
|-------------|----------------------------|----|------|-----------|
| 1829034_adh | TACGTTGACTTTGTGCAGTGATGT   | 24 | 1    | 21UR-2674 |
| 1917818_adh | TATGTAGTAACGGTTGCTGTT      | 21 | 4029 | 21UR-2683 |
| 1613110_adh | GTATGTAGTAACGGTTGCTGTT     | 22 | 1    | 21UR-2683 |
| 1917822_adh | TATGTAGTAACGGTTGCTGTTG     | 22 | 1    | 21UR-2683 |
| 1917823_adh | TATGTAGTAACGGTTGCTGTTGT    | 23 | 2    | 21UR-2683 |
| 1917824_adh | TATGTAGTAACGGTTGCTGTTGTG   | 24 | 1    | 21UR-2683 |
| 1986252_adh | TCCGGCATTGATCTGTGGAGG      | 21 | 1713 | 21UR-2686 |
| 1986253_adh | TCCGGCATTGATCTGTGGAGGA     | 22 | 51   | 21UR-2686 |
| 1986254_adh | TCCGGCATTGATCTGTGGAGGAA    | 23 | 10   | 21UR-2686 |
| 2595669_adh | TTCCAAAGAACGCGGGATTTC      | 21 | 169  | 21UR-2706 |
| 2595670_adh | TTCCAAAGAACGCGGGATTCC      | 22 | 1    | 21UR-2706 |
| 2387649_adh | TGGATAAGTTGTATCTTCGGG      | 21 | 4590 | 21UR-2710 |
| 2387653_adh | TGGATAAGTTGTATCTTCGGGT     | 22 | 6    | 21UR-2710 |
| 2387656_adh | TGGATAAGTTGTATCTTCGGGTTT   | 24 | 1    | 21UR-2710 |
| 2387657_adh | TGGATAAGTTGTATCTTCGGGTTTAT | 26 | 1    | 21UR-2710 |
| 1932555_adh | TCAAACACGCTGATTTTCGTGG     | 21 | 8    | 21UR-2711 |
| 1932556_adh | TCAAACACGCTGATTTTCGTGGA    | 22 | 1    | 21UR-2711 |
| 1844920_adh | TAGACACAGTTGATACGATTT      | 21 | 146  | 21UR-2729 |
| 1844924_adh | TAGACACAGTTGATACGATTTG     | 22 | 1    | 21UR-2729 |
| 1798976_adh | TAATCTTAGGCTGTGAAAAGA      | 21 | 48   | 21UR-2740 |
| 1798977_adh | TAATCTTAGGCTGTGAAAAGAA     | 22 | 1    | 21UR-2740 |
| 1860537_adh | TAGGAAAGGGGACTGCATTGT      | 21 | 437  | 21UR-2742 |
| 206561_adh  | AATAGGAAAGGGGACTGCATTGT    | 23 | 1    | 21UR-2742 |
| 2658336_adh | TTGGACGAAATTGCAATATGT      | 21 | 681  | 21UR-2799 |
| 730524_adh  | ATTGGACGAAATTGCAATATGT     | 22 | 1    | 21UR-2799 |
| 1787080_adh | TAAGGTTGGCGGGAGACAGTA      | 21 | 2209 | 21UR-2816 |
| 1787084_adh | TAAGGTTGGCGGGAGACAGTAT     | 22 | 23   | 21UR-2816 |
| 1962018_adh | TCAGATTTTGGACTACGATCG      | 21 | 58   | 21UR-2818 |
| 1962019_adh | TCAGATTTTGGACTACGATCGA     | 22 | 3    | 21UR-2818 |
| 1962021_adh | TCAGATTTTGGACTACGATCGAG    | 23 | 1    | 21UR-2818 |
| 1962022_adh | TCAGATTTTGGACTACGATCGAGTTA | 26 | 1    | 21UR-2818 |
| 1822171_adh | TACGACCAAAAATGAGATTGA      | 21 | 1034 | 21UR-2829 |
| 1822173_adh | TACGACCAAAAATGAGATTGAG     | 22 | 6    | 21UR-2829 |
| 1822175_adh | TACGACCAAAAATGAGATTGAGT    | 23 | 2    | 21UR-2829 |
| 2596280_adh | TTCCACGGCTGAACAGGACAA      | 21 | 1696 | 21UR-2834 |
| 2596285_adh | TTCCACGGCTGAACAGGACAAT     | 22 | 5    | 21UR-2834 |
| 1568629_adh | GGTTCCACGGCTGAACAGGACAA    | 23 | 1    | 21UR-2834 |
| 2596286_adh | TTCCACGGCTGAACAGGACAATA    | 23 | 1    | 21UR-2834 |
| 1798705_adh | TAATCTACAAAGCAGGGAAAA      | 21 | 138  | 21UR-2854 |
| 589190_adh  | ATAATCTACAAAGCAGGGAAAA     | 22 | 1    | 21UR-2854 |
| 1964258_adh | TCAGGCTTCGCTTCTAGTTGG      | 21 | 9    | 21UR-2857 |
| 1964259_adh | TCAGGCTTCGCTTCTAGTTGGA     | 22 | 1    | 21UR-2857 |
| 1964260_adh | TCAGGCTTCGCTTCTAGTTGGAA    | 23 | 1    | 21UR-2857 |
| 1814183_adh | TACATTAGAATGAGAAATTAA      | 21 | 248  | 21UR-2861 |
| 594054_adh  | ATACATTAGAATGAGAAATTAA     | 22 | 1    | 21UR-2861 |
| 1812260_adh | TACAGCCCCTGCCATCTAGT       | 21 | 4    | 21UR-2862 |
| 1812261_adh | TACAGCCCCTGCCATCTAGTAAA    | 24 | 1    | 21UR-2862 |
| 2285404_adh | TGCAATCAAGAAGATAACGC       | 21 | 175  | 21UR-2863 |
| 672823_adh  | ATGCAATCAAGAAGATAACGC      | 22 | 1    | 21UR-2863 |
| 2601132_adh | TTCTTACGAAATCTCCATAA       | 21 | 41   | 21UR-2871 |

|             |                           |    |      |           |
|-------------|---------------------------|----|------|-----------|
| 715841_adh  | ATTCCTTACGAAATCTCCATAA    | 22 | 1    | 21UR-2871 |
| 246804_adh  | AATTCCTTACGAAATCTCCATAA   | 23 | 1    | 21UR-2871 |
| 2601133_adh | TTCCTTACGAAATCTCCATAATT   | 23 | 1    | 21UR-2871 |
| 2309654_adh | TGCTGTGTAGGGCTATAATAA     | 21 | 1549 | 21UR-2872 |
| 2309655_adh | TGCTGTGTAGGGCTATAATAAA    | 22 | 2    | 21UR-2872 |
| 2309656_adh | TGCTGTGTAGGGCTATAATAAAA   | 23 | 4    | 21UR-2872 |
| 2309657_adh | TGCTGTGTAGGGCTATAATAAAAC  | 24 | 1    | 21UR-2872 |
| 2123971_adh | TGAACTACTAAAGACAGGAAA     | 21 | 434  | 21UR-2900 |
| 2123973_adh | TGAACTACTAAAGACAGGAAAT    | 22 | 1    | 21UR-2900 |
| 1834358_adh | TACTGTTTGCTTCTTTTTTGA     | 21 | 12   | 21UR-2904 |
| 1834359_adh | TACTGTTTGCTTCTTTTTTTGAA   | 22 | 3    | 21UR-2904 |
| 2458960_adh | TGGGTGGTGGATGTGTACAAT     | 21 | 287  | 21UR-2906 |
| 2458961_adh | TGGGTGGTGGATGTGTACAATATAC | 25 | 1    | 21UR-2906 |
| 2668571_adh | TTGGGTGGTGGATGTGTACAATATA | 25 | 1    | 21UR-2906 |
| 2130932_adh | TGAAGCATGCATATCGGTCTG     | 21 | 6942 | 21UR-2909 |
| 2130933_adh | TGAAGCATGCATATCGGTCTGA    | 22 | 9    | 21UR-2909 |
| 662004_adh  | ATGAAGCATGCATATCGGTCTG    | 22 | 2    | 21UR-2909 |
| 2130935_adh | TGAAGCATGCATATCGGTCTGAT   | 23 | 1    | 21UR-2909 |
| 224558_adh  | AATGAAGCATGCATATCGGTCTG   | 23 | 16   | 21UR-2909 |
| 2289365_adh | TGCAGTTAAGGCTATTATTTTC    | 21 | 96   | 21UR-2910 |
| 229480_adh  | AATGCAGTTAAGGCTATTATTTTC  | 23 | 1    | 21UR-2910 |
| 1823675_adh | TACGAGTTGTGCACTTTGGAA     | 21 | 22   | 21UR-2916 |
| 1823678_adh | TACGAGTTGTGCACTTTGGAAAAT  | 24 | 1    | 21UR-2916 |
| 2504319_adh | TGTGACGTTGAAATGAGTGCC     | 21 | 3007 | 21UR-2917 |
| 2504320_adh | TGTGACGTTGAAATGAGTGCCA    | 22 | 102  | 21UR-2917 |
| 2504322_adh | TGTGACGTTGAAATGAGTGCCAC   | 23 | 21   | 21UR-2917 |
| 2504323_adh | TGTGACGTTGAAATGAGTGCCACA  | 24 | 2    | 21UR-2917 |
| 2671775_adh | TTGGTTCAAAAATGAAGCTGT     | 21 | 494  | 21UR-2929 |
| 1115317_adh | CTTGGTTCAAAAATGAAGCTGT    | 22 | 1    | 21UR-2929 |
| 2671777_adh | TTGGTTCAAAAATGAAGCTGTC    | 22 | 2    | 21UR-2929 |
| 1806070_adh | TAATTTTGTAGGACTTCAATT     | 21 | 57   | 21UR-2934 |
| 1806071_adh | TAATTTTGTAGGACTTCAATTT    | 22 | 1    | 21UR-2934 |
| 1756867_adh | TAAAGATAGCTGTTTATATTT     | 21 | 175  | 21UR-2940 |
| 1024752_adh | CTAAAGATAGCTGTTTATATTT    | 22 | 1    | 21UR-2940 |
| 2296435_adh | TGCGACCGCGATACTTCTAAA     | 21 | 491  | 21UR-2943 |
| 2296436_adh | TGCGACCGCGATACTTCTAAAA    | 22 | 2    | 21UR-2943 |
| 675700_adh  | ATGCGACCGCGATACTTCTAAA    | 22 | 1    | 21UR-2943 |
| 2296437_adh | TGCGACCGCGATACTTCTAAAAA   | 23 | 1    | 21UR-2943 |
| 1889381_adh | TATAGTTTCTCGACGGTGTGT     | 21 | 2976 | 21UR-2949 |
| 1889389_adh | TATAGTTTCTCGACGGTGTGTT    | 22 | 4    | 21UR-2949 |
| 1911881_adh | TATGATTAGGCGTTAGCAAAA     | 21 | 67   | 21UR-2977 |
| 1911882_adh | TATGATTAGGCGTTAGCAAAAAA   | 23 | 1    | 21UR-2977 |
| 2525636_adh | TGTTATTTGAATCAGACGACT     | 21 | 3586 | 21UR-3016 |
| 700430_adh  | ATGTTATTTGAATCAGACGACT    | 22 | 1    | 21UR-3016 |
| 2590262_adh | TTCAGAAAGTAAGTGAAGCAA     | 21 | 63   | 21UR-3017 |
| 246128_adh  | AATTCAGAAAGTAAGTGAAGCAA   | 23 | 2    | 21UR-3017 |
| 2296820_adh | TGCGACTTACGTTCTGTCCGA     | 21 | 243  | 21UR-3051 |
| 2296821_adh | TGCGACTTACGTTCTGTCCGAA    | 22 | 3    | 21UR-3051 |
| 2296822_adh | TGCGACTTACGTTCTGTCCGAAA   | 23 | 2    | 21UR-3051 |
| 1937924_adh | TCAACTTCAGATACGTAGTGA     | 21 | 696  | 21UR-3052 |

|             |                           |    |       |           |
|-------------|---------------------------|----|-------|-----------|
| 1937928_adh | TCAACTTCAGATACGTAGTGAT    | 22 | 2     | 21UR-3052 |
| 1829550_adh | TACTACATTTTCACGAAATCA     | 21 | 165   | 21UR-3054 |
| 204480_adh  | AATACTACATTTTCACGAAATCA   | 23 | 4     | 21UR-3054 |
| 2586134_adh | TTCAACGTGTATGTTCCGGGTT    | 21 | 30    | 21UR-3059 |
| 245971_adh  | AATTC AACGTGTATGTTCCGGGTT | 23 | 1     | 21UR-3059 |
| 1985580_adh | TCCGCTTCCATTGCTGAATGA     | 21 | 9     | 21UR-3071 |
| 1985581_adh | TCCGCTTCCATTGCTGAATGAC    | 22 | 2     | 21UR-3071 |
| 2586055_adh | TTCAACGGCTGTACAAAAAGA     | 21 | 352   | 21UR-3074 |
| 2586056_adh | TTCAACGGCTGTACAAAAAGAAA   | 23 | 4     | 21UR-3074 |
| 2034783_adh | TCTATGTTGGCAATAAGCGGA     | 21 | 751   | 21UR-3078 |
| 2034784_adh | TCTATGTTGGCAATAAGCGGAA    | 22 | 1     | 21UR-3078 |
| 2034785_adh | TCTATGTTGGCAATAAGCGGAAA   | 23 | 5     | 21UR-3078 |
| 1924398_adh | TATTCGGAGGATTCAGCCTGC     | 21 | 3     | 21UR-3079 |
| 1924399_adh | TATTCGGAGGATTCAGCCTGCAA   | 23 | 1     | 21UR-3079 |
| 2288827_adh | TGCAGTCACAAGAGGATTCAC     | 21 | 277   | 21UR-3084 |
| 2288828_adh | TGCAGTCACAAGAGGATTCACGA   | 23 | 2     | 21UR-3084 |
| 1827827_adh | TACGTAGACGCCTTTAAAAGC     | 21 | 805   | 21UR-3085 |
| 1827828_adh | TACGTAGACGCCTTTAAAAGCAA   | 23 | 1     | 21UR-3085 |
| 204228_adh  | AATACGTAGACGCCTTTAAAAGC   | 23 | 2     | 21UR-3085 |
| 1827829_adh | TACGTAGACGCCTTTAAAAGCAA   | 24 | 1     | 21UR-3085 |
| 1917926_adh | TATGTAGTAATATGGGGATGG     | 21 | 3328  | 21UR-3106 |
| 1613111_adh | GTATGTAGTAATATGGGGATGG    | 22 | 1     | 21UR-3106 |
| 1917927_adh | TATGTAGTAATATGGGGATGGA    | 22 | 3     | 21UR-3106 |
| 1917929_adh | TATGTAGTAATATGGGGATGGAT   | 23 | 3     | 21UR-3106 |
| 2273579_adh | TGATGTGCAGGTCGCTTATGA     | 21 | 37    | 21UR-3112 |
| 228428_adh  | AATGATGTGCAGGTCGCTTATGA   | 23 | 2     | 21UR-3112 |
| 2273580_adh | TGATGTGCAGGTCGCTTATGAAGA  | 24 | 1     | 21UR-3112 |
| 1875027_adh | TAGTAGTTTGTGCGATATATAT    | 21 | 675   | 21UR-3114 |
| 1875028_adh | TAGTAGTTTGTGCGATATATATA   | 22 | 2     | 21UR-3114 |
| 2286064_adh | TGCACAGGAGCAGCTTATTGT     | 21 | 34    | 21UR-3119 |
| 672916_adh  | ATGCACAGGAGCAGCTTATTGT    | 22 | 1     | 21UR-3119 |
| 229204_adh  | AATGCACAGGAGCAGCTTATTGT   | 23 | 1     | 21UR-3119 |
| 2037772_adh | TCTCAGTCGTTGATACATTGA     | 21 | 1406  | 21UR-3122 |
| 653311_adh  | ATCTCAGTCGTTGATACATTGA    | 22 | 1     | 21UR-3122 |
| 1798941_adh | TAATCTGTTAACATCCGAATA     | 21 | 3     | 21UR-3123 |
| 201290_adh  | AATAATCTGTTAACATCCGAATA   | 23 | 1     | 21UR-3123 |
| 1959850_adh | TCAGATACTGGTCCTTGAAAA     | 21 | 385   | 21UR-3124 |
| 1959852_adh | TCAGATACTGGTCCTTGAAAAT    | 22 | 1     | 21UR-3124 |
| 1959854_adh | TCAGATACTGGTCCTTGAAAATT   | 23 | 1     | 21UR-3124 |
| 2492297_adh | TGTATGTAAAACTTTACGGCA     | 21 | 15096 | 21UR-3129 |
| 2492298_adh | TGTATGTAAAACTTTACGGCAA    | 22 | 8     | 21UR-3129 |
| 695590_adh  | ATGTATGTAAAACTTTACGGCA    | 22 | 8     | 21UR-3129 |
| 240900_adh  | AATGTATGTAAAACTTTACGGCA   | 23 | 15    | 21UR-3129 |
| 2492301_adh | TGTATGTAAAACTTTACGGCAATA  | 24 | 2     | 21UR-3129 |
| 2492302_adh | TGTATGTAAAACTTTACGGCAATAT | 25 | 3     | 21UR-3129 |
| 1920898_adh | TATTACGGCCGTACAGCAAAT     | 21 | 125   | 21UR-3168 |
| 1920899_adh | TATTACGGCCGTACAGCAAATT    | 22 | 1     | 21UR-3168 |
| 1872532_adh | TAGGTTGTTTCGTAGCAGTGCT    | 21 | 62    | 21UR-3173 |
| 1872533_adh | TAGGTTGTTTCGTAGCAGTGCTG   | 22 | 1     | 21UR-3173 |
| 206961_adh  | AATAGGTTGTTTCGTAGCAGTGCT  | 23 | 1     | 21UR-3173 |

|             |                             |    |      |           |
|-------------|-----------------------------|----|------|-----------|
| 2010522_adh | TCGGAACATAAAGAATGAACA       | 21 | 251  | 21UR-3180 |
| 1052088_adh | CTCGGAACATAAAGAATGAACA      | 22 | 1    | 21UR-3180 |
| 2010524_adh | TCGGAACATAAAGAATGAACAT      | 22 | 1    | 21UR-3180 |
| 334965_adh  | ACTCGGAACATAAAGAATGAACAT    | 24 | 1    | 21UR-3180 |
| 2010526_adh | TCGGAACATAAAGAATGAACATTAT   | 25 | 1    | 21UR-3180 |
| 2295734_adh | TGCGAAGACTTTACATATCGT       | 21 | 661  | 21UR-3183 |
| 2295735_adh | TGCGAAGACTTTACATATCGTT      | 22 | 1    | 21UR-3183 |
| 2651731_adh | TTGCGAAGACTTTACATATCGT      | 22 | 1    | 21UR-3183 |
| 2061430_adh | TCTTTCTGTGGAAGCGTTTGA       | 21 | 2168 | 21UR-3184 |
| 2061443_adh | TCTTTCTGTGGAAGCGTTTGAT      | 22 | 9    | 21UR-3184 |
| 2061444_adh | TCTTTCTGTGGAAGCGTTTGATA     | 23 | 2    | 21UR-3184 |
| 2608649_adh | TTCGGCTACATTTCTCTCTTC       | 21 | 196  | 21UR-3191 |
| 2608651_adh | TTCGGCTACATTTCTCTCTTCC      | 22 | 1    | 21UR-3191 |
| 247479_adh  | AATTCGGCTACATTTCTCTCTTC     | 23 | 2    | 21UR-3191 |
| 2558153_adh | TTACGTTGATCGACTAGTTCC       | 21 | 109  | 21UR-3196 |
| 2558155_adh | TTACGTTGATCGACTAGTTCCT      | 22 | 1    | 21UR-3196 |
| 705725_adh  | ATTACGTTGATCGACTAGTTCC      | 22 | 1    | 21UR-3196 |
| 1814243_adh | TACATTATTGGCATATATAAC       | 21 | 9    | 21UR-3198 |
| 1814244_adh | TACATTATTGGCATATATAACT      | 22 | 1    | 21UR-3198 |
| 2475025_adh | TGGTTCCTCATTGAAGATTGA       | 21 | 7    | 21UR-3200 |
| 2672078_adh | TTGGTTCCTCATTGAAGATTGAA     | 23 | 1    | 21UR-3200 |
| 2421249_adh | TGGGACACACTTTTGGTTTTA       | 21 | 59   | 21UR-3203 |
| 237809_adh  | AATGGGACACACTTTTGGTTTTA     | 23 | 1    | 21UR-3203 |
| 1787340_adh | TAAGTAACGGACTTTTCAATT       | 21 | 779  | 21UR-3213 |
| 200737_adh  | AATAAGTAACGGACTTTTCAATT     | 23 | 4    | 21UR-3213 |
| 1787342_adh | TAAGTAACGGACTTTTCAATTACAT   | 25 | 2    | 21UR-3213 |
| 1863917_adh | TAGGAGGAAGCATTGTGCATA       | 21 | 1918 | 21UR-3219 |
| 1863918_adh | TAGGAGGAAGCATTGTGCATAA      | 22 | 2    | 21UR-3219 |
| 1863920_adh | TAGGAGGAAGCATTGTGCATAAC     | 23 | 1    | 21UR-3219 |
| 2119707_adh | TGAACAAGCGACTGCATAAAG       | 21 | 2026 | 21UR-3224 |
| 1062890_adh | CTGAACAAGCGACTGCATAAAG      | 22 | 3    | 21UR-3224 |
| 2119708_adh | TGAACAAGCGACTGCATAAAGAA     | 23 | 3    | 21UR-3224 |
| 2119709_adh | TGAACAAGCGACTGCATAAAGAAT    | 24 | 2    | 21UR-3224 |
| 2119710_adh | TGAACAAGCGACTGCATAAAGAATA   | 25 | 1    | 21UR-3224 |
| 2119711_adh | TGAACAAGCGACTGCATAAAGAATAA  | 26 | 2    | 21UR-3224 |
| 1851864_adh | TAGATTAAGTGTTAGGCTATGA      | 21 | 141  | 21UR-3238 |
| 604437_adh  | ATAGATTAAGTGTTAGGCTATGA     | 22 | 1    | 21UR-3238 |
| 1789674_adh | TAAGTTTGAAAGATTTGAAGG       | 21 | 41   | 21UR-3242 |
| 1789675_adh | TAAGTTTGAAAGATTTGAAGGC      | 22 | 1    | 21UR-3242 |
| 2253312_adh | TGAGTGAACCTTATCAGCAGGC      | 21 | 475  | 21UR-3246 |
| 2642665_adh | TTGAGTGAACCTTATCAGCAGGC     | 22 | 37   | 21UR-3246 |
| 2253318_adh | TGAGTGAACCTTATCAGCAGGCCGGG  | 24 | 1    | 21UR-3246 |
| 2642668_adh | TTGAGTGAACCTTATCAGCAGGCCGGG | 25 | 1    | 21UR-3246 |
| 1915304_adh | TATGGCACGTCATTTTATAAA       | 21 | 21   | 21UR-3248 |
| 1915305_adh | TATGGCACGTCATTTTATAAAT      | 22 | 1    | 21UR-3248 |
| 1929666_adh | TATTTTCATGTCTTCGGTTTCA      | 21 | 1064 | 21UR-3260 |
| 1929667_adh | TATTTTCATGTCTTCGGTTTCAT     | 22 | 1    | 21UR-3260 |
| 1897417_adh | TATCGCGCCTTGGAATGGATA       | 21 | 77   | 21UR-3267 |
| 1897418_adh | TATCGCGCCTTGGAATGGATAA      | 22 | 1    | 21UR-3267 |
| 1882914_adh | TAGTTTCCTCCAACACGGCA        | 21 | 44   | 21UR-3269 |

|             |                           |    |      |           |
|-------------|---------------------------|----|------|-----------|
| 1882915_adh | TAGTTTCCTCCAAACACGGCAA    | 22 | 1    | 21UR-3269 |
| 2303995_adh | TGCGTCTGACAAGGAAAGGAA     | 21 | 287  | 21UR-3282 |
| 2303998_adh | TGCGTCTGACAAGGAAAGGAAGT   | 23 | 2    | 21UR-3282 |
| 2419941_adh | TGGGAAGTTTGGTCTTACGGC     | 21 | 458  | 21UR-3292 |
| 2419942_adh | TGGGAAGTTTGGTCTTACGGCA    | 22 | 2    | 21UR-3292 |
| 2419943_adh | TGGGAAGTTTGGTCTTACGGCAA   | 23 | 9    | 21UR-3292 |
| 2419944_adh | TGGGAAGTTTGGTCTTACGGCAAA  | 24 | 1    | 21UR-3292 |
| 2169476_adh | TGACTGACTGACACTACTAGA     | 21 | 122  | 21UR-3324 |
| 2169477_adh | TGACTGACTGACACTACTAGAA    | 22 | 3    | 21UR-3324 |
| 2277470_adh | TGATTGTTGATTGTCTGTTTTTC   | 21 | 1694 | 21UR-3330 |
| 2277471_adh | TGATTGTTGATTGTCTGTTTTCAA  | 23 | 3    | 21UR-3330 |
| 1900379_adh | TATCTTCGTTTTGGCAATAAC     | 21 | 839  | 21UR-3336 |
| 1900380_adh | TATCTTCGTTTTGGCAATAACT    | 22 | 1    | 21UR-3336 |
| 1978231_adh | TCCAGATGATGAACGGTAATT     | 21 | 5564 | 21UR-3339 |
| 1978232_adh | TCCAGATGATGAACGGTAATTA    | 22 | 1    | 21UR-3339 |
| 1978234_adh | TCCAGATGATGAACGGTAATTAC   | 23 | 1    | 21UR-3339 |
| 1978235_adh | TCCAGATGATGAACGGTAATTACAA | 25 | 1    | 21UR-3339 |
| 1908510_adh | TATGACTAGTGCAAATTTCTG     | 21 | 20   | 21UR-3344 |
| 1908512_adh | TATGACTAGTGCAAATTTCTGTT   | 23 | 1    | 21UR-3344 |
| 1962078_adh | TCAGCAAATGATACAAAATTG     | 21 | 2    | 21UR-3350 |
| 1962079_adh | TCAGCAAATGATACAAAATTGA    | 22 | 1    | 21UR-3350 |
| 1912002_adh | TATGATTGACCGAATAATTGA     | 21 | 29   | 21UR-3356 |
| 1912004_adh | TATGATTGACCGAATAATTGAAAT  | 24 | 1    | 21UR-3356 |
| 2004213_adh | TCGATGGCTATGTGGACTATT     | 21 | 175  | 21UR-3363 |
| 2004214_adh | TCGATGGCTATGTGGACTATTT    | 22 | 3    | 21UR-3363 |
| 2004215_adh | TCGATGGCTATGTGGACTATTTAGA | 25 | 1    | 21UR-3363 |
| 2584324_adh | TTATTTGTGTGCCGTCGTTGG     | 21 | 1446 | 21UR-3375 |
| 2584328_adh | TTATTTGTGTGCCGTCGTTGGT    | 22 | 3    | 21UR-3375 |
| 2584332_adh | TTATTTGTGTGCCGTCGTTGGTT   | 23 | 1    | 21UR-3375 |
| 1830322_adh | TACTAGTCCTATCAACTGAGA     | 21 | 26   | 21UR-3379 |
| 1830323_adh | TACTAGTCCTATCAACTGAGATAC  | 24 | 1    | 21UR-3379 |
| 2307887_adh | TGCTCTGGACAGAACGTTAGT     | 21 | 395  | 21UR-3381 |
| 2307889_adh | TGCTCTGGACAGAACGTTAGTT    | 22 | 1    | 21UR-3381 |
| 677408_adh  | ATGCTCTGGACAGAACGTTAGT    | 22 | 2    | 21UR-3381 |
| 625414_adh  | ATCAATTTTGGTAATTAATCCG    | 22 | 1    | 21UR-3386 |
| 2126432_adh | TGAACTTAGAGCTAGACAATC     | 21 | 526  | 21UR-3387 |
| 2126433_adh | TGAACTTAGAGCTAGACAATCGG   | 23 | 2    | 21UR-3387 |
| 2644893_adh | TTGATGATTGAAAGTTGTGCG     | 21 | 46   | 21UR-3395 |
| 251029_adh  | AATTGATGATTGAAAGTTGTGCG   | 23 | 4    | 21UR-3395 |
| 2644895_adh | TTGATGATTGAAAGTTGTGCGTTT  | 24 | 1    | 21UR-3395 |
| 2258857_adh | TGATAAGCTATGAAAAGAACG     | 21 | 278  | 21UR-3399 |
| 2258858_adh | TGATAAGCTATGAAAAGAACGG    | 22 | 2    | 21UR-3399 |
| 227606_adh  | AATGATAAGCTATGAAAAGAACG   | 23 | 1    | 21UR-3399 |
| 2390247_adh | TGGATCTAAAATTTGTAGAAC     | 21 | 201  | 21UR-3405 |
| 233239_adh  | AATGGATCTAAAATTTGTAGAAC   | 23 | 1    | 21UR-3405 |
| 2593866_adh | TTCATCAAGCTAAAATCAGAA     | 21 | 77   | 21UR-3407 |
| 712728_adh  | ATTCATCAAGCTAAAATCAGAA    | 22 | 2    | 21UR-3407 |
| 246253_adh  | AATTCATCAAGCTAAAATCAGAA   | 23 | 5    | 21UR-3407 |
| 2593867_adh | TTCATCAAGCTAAAATCAGAAAA   | 23 | 1    | 21UR-3407 |
| 1868279_adh | TAGGGAATGACTTTTTTCCCT     | 21 | 8    | 21UR-3445 |

|             |                             |    |       |           |
|-------------|-----------------------------|----|-------|-----------|
| 206771_adh  | AATAGGGAATGACTTTTTCCCT      | 23 | 1     | 21UR-3445 |
| 2420769_adh | TGGGAATGATAAATGAATGAA       | 21 | 11    | 21UR-3467 |
| 2420770_adh | TGGGAATGATAAATGAATGAAGA     | 23 | 1     | 21UR-3467 |
| 1865820_adh | TAGGATGGTACTATTTTCATTC      | 21 | 660   | 21UR-3468 |
| 607327_adh  | ATAGGATGGTACTATTTTCATTC     | 22 | 2     | 21UR-3468 |
| 1865821_adh | TAGGATGGTACTATTTTCATTCAA    | 23 | 1     | 21UR-3468 |
| 1777123_adh | TAAGAGGAGATAACGAACTGA       | 21 | 3007  | 21UR-3470 |
| 1777131_adh | TAAGAGGAGATAACGAACTGAT      | 22 | 7     | 21UR-3470 |
| 586105_adh  | ATAAGAGGAGATAACGAACTGA      | 22 | 2     | 21UR-3470 |
| 1777138_adh | TAAGAGGAGATAACGAACTGATTG    | 24 | 2     | 21UR-3470 |
| 1777139_adh | TAAGAGGAGATAACGAACTGATTGT   | 25 | 5     | 21UR-3470 |
| 1814873_adh | TACCAATCTTCTTATTATTGG       | 21 | 8     | 21UR-3486 |
| 203523_adh  | AATACCAATCTTCTTATTATTGG     | 23 | 1     | 21UR-3486 |
| 1830720_adh | TACTATTCTGGCCAACCTTGA       | 21 | 26    | 21UR-3498 |
| 1830724_adh | TACTATTCTGGCCAACCTTGAC      | 22 | 1     | 21UR-3498 |
| 1928262_adh | TATTGTTATTTGATTGGCATG       | 21 | 2851  | 21UR-3502 |
| 621736_adh  | ATATTGTTATTTGATTGGCATG      | 22 | 2     | 21UR-3502 |
| 209372_adh  | AATATTGTTATTTGATTGGCATG     | 23 | 45    | 21UR-3502 |
| 2569676_adh | TTAGTAAACTGGTAGACAATA       | 21 | 26    | 21UR-3509 |
| 244978_adh  | AATTAGTAAACTGGTAGACAATA     | 23 | 1     | 21UR-3509 |
| 2486733_adh | TGTACCTTTGTAGATTGCTTT       | 21 | 357   | 21UR-3522 |
| 2486734_adh | TGTACCTTTGTAGATTGCTTTA      | 22 | 3     | 21UR-3522 |
| 2486735_adh | TGTACCTTTGTAGATTGCTTTAA     | 23 | 31    | 21UR-3522 |
| 2486736_adh | TGTACCTTTGTAGATTGCTTTAAA    | 24 | 1     | 21UR-3522 |
| 2184689_adh | TGAGACTGCCGAAACAACCTCA      | 21 | 118   | 21UR-3527 |
| 2184690_adh | TGAGACTGCCGAAACAACCTCAG     | 22 | 1     | 21UR-3527 |
| 226877_adh  | AATGAGACTGCCGAAACAACCTCA    | 23 | 1     | 21UR-3527 |
| 2182984_adh | TGAGACATAGTTAGGCACAAA       | 21 | 654   | 21UR-3530 |
| 2182988_adh | TGAGACATAGTTAGGCACAAAAG     | 22 | 10    | 21UR-3530 |
| 2182989_adh | TGAGACATAGTTAGGCACAAAAGT    | 23 | 8     | 21UR-3530 |
| 1833170_adh | TACTGGAATTTTATTGTAACCT      | 21 | 42    | 21UR-3538 |
| 1833171_adh | TACTGGAATTTTATTGTAACCTAT    | 23 | 1     | 21UR-3538 |
| 2136401_adh | TGAATAAAGGCCGAAGGCAAA       | 21 | 74    | 21UR-3559 |
| 1065031_adh | CTGAATAAAGGCCGAAGGCAAA      | 22 | 1     | 21UR-3559 |
| 2136404_adh | TGAATAAAGGCCGAAGGCAAAC      | 22 | 1     | 21UR-3559 |
| 1884735_adh | TATAACGGTTAACTTAGAGCC       | 21 | 58    | 21UR-3573 |
| 1884736_adh | TATAACGGTTAACTTAGAGCCA      | 22 | 2     | 21UR-3573 |
| 1824233_adh | TACGATGGATATTTTGTGGT        | 21 | 288   | 21UR-3581 |
| 596459_adh  | ATACGATGGATATTTTGTGGT       | 22 | 1     | 21UR-3581 |
| 204021_adh  | AATACGATGGATATTTTGTGGT      | 23 | 1     | 21UR-3581 |
| 2141581_adh | TGAATCATGTAGAATTGTCAA       | 21 | 39136 | 21UR-3588 |
| 2141582_adh | TGAATCATGTAGAATTGTCAAA      | 22 | 4     | 21UR-3588 |
| 2141583_adh | TGAATCATGTAGAATTGTCAAAA     | 23 | 26    | 21UR-3588 |
| 2141585_adh | TGAATCATGTAGAATTGTCAAAAAG   | 24 | 2     | 21UR-3588 |
| 2141586_adh | TGAATCATGTAGAATTGTCAAAAAGT  | 25 | 8     | 21UR-3588 |
| 2141587_adh | TGAATCATGTAGAATTGTCAAAAAGTA | 26 | 2     | 21UR-3588 |
| 2031713_adh | TCTACGGCTTGAGAAAAACC        | 21 | 687   | 21UR-3601 |
| 2031714_adh | TCTACGGCTTGAGAAAAACCT       | 22 | 1     | 21UR-3601 |
| 2031717_adh | TCTACGGCTTGAGAAAAACCTTT     | 24 | 1     | 21UR-3601 |
| 2031718_adh | TCTACGGCTTGAGAAAAACCTTTTG   | 26 | 1     | 21UR-3601 |

|             |                            |    |      |           |
|-------------|----------------------------|----|------|-----------|
| 2075571_adh | TGAAAGAATGCAGAAATTATG      | 21 | 2464 | 21UR-3604 |
| 1062393_adh | CTGAAAGAATGCAGAAATTATG     | 22 | 1    | 21UR-3604 |
| 2075574_adh | TGAAAGAATGCAGAAATTATGC     | 22 | 2    | 21UR-3604 |
| 2075575_adh | TGAAAGAATGCAGAAATTATGCGAA  | 25 | 1    | 21UR-3604 |
| 2731174_adh | TTTGTTGACGTATACGCAATT      | 21 | 1789 | 21UR-3613 |
| 1123657_adh | CTTTGTTGACGTATACGCAATT     | 22 | 1    | 21UR-3613 |
| 1748207_adh | TAAAACGAGAACTGGCATGAT      | 21 | 806  | 21UR-3636 |
| 198766_adh  | AATAAACGAGAACTGGCATGAT     | 23 | 2    | 21UR-3636 |
| 1748209_adh | TAAAACGAGAACTGGCATGATACT   | 24 | 2    | 21UR-3636 |
| 1863417_adh | TAGGAGAAACAAGTGTGTTGT      | 21 | 107  | 21UR-3639 |
| 206612_adh  | AATAGGAGAAACAAGTGTGTTGT    | 23 | 1    | 21UR-3639 |
| 2320152_adh | TGGAACGATGTGCAACGAAAA      | 21 | 2946 | 21UR-3642 |
| 1076015_adh | CTGGAACGATGTGCAACGAAAA     | 22 | 7    | 21UR-3642 |
| 2320156_adh | TGGAACGATGTGCAACGAAAAT     | 22 | 25   | 21UR-3642 |
| 2320161_adh | TGGAACGATGTGCAACGAAAATT    | 23 | 2    | 21UR-3642 |
| 2320162_adh | TGGAACGATGTGCAACGAAAATTAT  | 25 | 1    | 21UR-3642 |
| 343495_adh  | ACTGGAACGATGTGCAACGAAAATT  | 25 | 1    | 21UR-3642 |
| 1813046_adh | TACATAAGCGGTAAGAGTCCA      | 21 | 244  | 21UR-3644 |
| 1813047_adh | TACATAAGCGGTAAGAGTCCAGAAT  | 25 | 1    | 21UR-3644 |
| 1962084_adh | TCAGCAACCATCGTGTCCCAA      | 21 | 2    | 21UR-3649 |
| 213445_adh  | AATCAGCAACCATCGTGTCCCAA    | 23 | 1    | 21UR-3649 |
| 2041640_adh | TCTCGTGGATAAATAAGCATT      | 21 | 1320 | 21UR-3651 |
| 1058260_adh | CTCTCGTGGATAAATAAGCATT     | 22 | 1    | 21UR-3651 |
| 2041642_adh | TCTCGTGGATAAATAAGCATTT     | 22 | 3    | 21UR-3651 |
| 2041647_adh | TCTCGTGGATAAATAAGCATTTGA   | 24 | 2    | 21UR-3651 |
| 2301714_adh | TGCGGCGTAGATATGACATGA      | 21 | 43   | 21UR-3660 |
| 2301715_adh | TGCGGCGTAGATATGACATGAT     | 22 | 2    | 21UR-3660 |
| 2616367_adh | TTCTCCTACTTTCCAGGCAGA      | 21 | 63   | 21UR-3667 |
| 248827_adh  | AATTCTCCTACTTTCCAGGCAGA    | 23 | 1    | 21UR-3667 |
| 2616368_adh | TTCTCCTACTTTCCAGGCAGAAA    | 23 | 2    | 21UR-3667 |
| 2030683_adh | TCTAATGCAGAAATTTTGTTTC     | 21 | 1000 | 21UR-3681 |
| 2030684_adh | TCTAATGCAGAAATTTTGTTCA     | 22 | 1    | 21UR-3681 |
| 2030686_adh | TCTAATGCAGAAATTTTGTTTCA    | 23 | 1    | 21UR-3681 |
| 2030687_adh | TCTAATGCAGAAATTTTGTTCACT   | 24 | 1    | 21UR-3681 |
| 1812881_adh | TACAGTTAGAGAAGCATTAAAC     | 21 | 48   | 21UR-3685 |
| 1812882_adh | TACAGTTAGAGAAGCATTAAACATTT | 25 | 1    | 21UR-3685 |
| 1853081_adh | TAGCAACGGTATTGTAATCAA      | 21 | 1057 | 21UR-3692 |
| 1853082_adh | TAGCAACGGTATTGTAATCAAAAAT  | 25 | 2    | 21UR-3692 |
| 2152464_adh | TGACAATGTAGCGTTAGCAAT      | 21 | 318  | 21UR-3708 |
| 2152465_adh | TGACAATGTAGCGTTAGCAATA     | 22 | 1    | 21UR-3708 |
| 1834944_adh | TACTTCGTGGCTAACTATCGT      | 21 | 52   | 21UR-3716 |
| 1834945_adh | TACTTCGTGGCTAACTATCGTA     | 22 | 1    | 21UR-3716 |
| 1868955_adh | TAGGGCTTTCTACTTTTTTTGA     | 21 | 5    | 21UR-3717 |
| 1868956_adh | TAGGGCTTTCTACTTTTTTTGAA    | 22 | 2    | 21UR-3717 |
| 2738933_adh | TTTTCGTTGTGGACAATTTGG      | 21 | 1745 | 21UR-3730 |
| 2738942_adh | TTTTCGTTGTGGACAATTTGGT     | 22 | 10   | 21UR-3730 |
| 2738943_adh | TTTTCGTTGTGGACAATTTGGTAT   | 24 | 19   | 21UR-3730 |
| 2738945_adh | TTTTCGTTGTGGACAATTTGGTATT  | 25 | 12   | 21UR-3730 |
| 1789011_adh | TAAGTTAGGCGTAATACTTGT      | 21 | 643  | 21UR-3742 |
| 539978_adh  | AGTAAGTTAGGCGTAATACTTGT    | 23 | 1    | 21UR-3742 |

|             |                           |    |      |           |
|-------------|---------------------------|----|------|-----------|
| 2323594_adh | TGGAAGCTTGATGGAAAATGC     | 21 | 1033 | 21UR-3766 |
| 2323595_adh | TGGAAGCTTGATGGAAAATGCA    | 22 | 1    | 21UR-3766 |
| 2323596_adh | TGGAAGCTTGATGGAAAATGCAA   | 23 | 2    | 21UR-3766 |
| 2323597_adh | TGGAAGCTTGATGGAAAATGCAAA  | 24 | 1    | 21UR-3766 |
| 2149922_adh | TGACAACGGCTTTGTGAGAAA     | 21 | 1469 | 21UR-3775 |
| 2149923_adh | TGACAACGGCTTTGTGAGAAAA    | 22 | 6    | 21UR-3775 |
| 2149924_adh | TGACAACGGCTTTGTGAGAAAAA   | 23 | 5    | 21UR-3775 |
| 1996293_adh | TCGAAGATGACGATGACCTTA     | 21 | 2014 | 21UR-3779 |
| 1996294_adh | TCGAAGATGACGATGACCTTAA    | 22 | 1    | 21UR-3779 |
| 2296296_adh | TGCGACACCGATAAGAGAACA     | 21 | 41   | 21UR-3788 |
| 2296297_adh | TGCGACACCGATAAGAGAACAAA   | 23 | 3    | 21UR-3788 |
| 1912228_adh | TATGATTTTCATCAGATGGTTC    | 21 | 8    | 21UR-3798 |
| 208576_adh  | AATATGATTTTCATCAGATGGTTC  | 23 | 1    | 21UR-3798 |
| 2374477_adh | TGGACCAAGGATAATGTCAGC     | 21 | 2502 | 21UR-3802 |
| 2374480_adh | TGGACCAAGGATAATGTCAGCC    | 22 | 1    | 21UR-3802 |
| 2568304_adh | TTAGGATTAGTTGTACAGCCC     | 21 | 1371 | 21UR-3805 |
| 2568306_adh | TTAGGATTAGTTGTACAGCCCT    | 22 | 1    | 21UR-3805 |
| 2670298_adh | TTGGTCGTCGATCAGGCAAAG     | 21 | 29   | 21UR-3808 |
| 2670299_adh | TTGGTCGTCGATCAGGCAAAGT    | 22 | 1    | 21UR-3808 |
| 2470224_adh | TGGTCTGCCAAAGAACACGTT     | 21 | 313  | 21UR-3819 |
| 2470226_adh | TGGTCTGCCAAAGAACACGTTGT   | 23 | 1    | 21UR-3819 |
| 2658967_adh | TTGGACTGTTCCACGTGAAAA     | 21 | 1604 | 21UR-3863 |
| 2658968_adh | TTGGACTGTTCCACGTGAAAAA    | 22 | 10   | 21UR-3863 |
| 2658969_adh | TTGGACTGTTCCACGTGAAAAAA   | 23 | 5    | 21UR-3863 |
| 1910009_adh | TATGATAATTTGGTTACTCGA     | 21 | 47   | 21UR-3866 |
| 1910010_adh | TATGATAATTTGGTTACTCGAT    | 22 | 1    | 21UR-3866 |
| 2529487_adh | TGTTGCGAAATTTTCAAAGTC     | 21 | 1    | 21UR-3891 |
| 243142_adh  | AATGTTGCGAAATTTTCAAAGTC   | 23 | 1    | 21UR-3891 |
| 2251929_adh | TGAGTAGGGCATTGGATTACT     | 21 | 398  | 21UR-3898 |
| 2251930_adh | TGAGTAGGGCATTGGATTACTAAT  | 24 | 1    | 21UR-3898 |
| 2481985_adh | TGTAAGAGTTGAAAAGGAGAA     | 21 | 612  | 21UR-3901 |
| 2481987_adh | TGTAAGAGTTGAAAAGGAGAAAT   | 22 | 2    | 21UR-3901 |
| 1946314_adh | TCACATTCTTGTCCCTCTGTAC    | 21 | 21   | 21UR-3902 |
| 1946315_adh | TCACATTCTTGTCCCTCTGTACGAC | 24 | 1    | 21UR-3902 |
| 2657503_adh | TTGGAATCAATTGTTGTTGGA     | 21 | 186  | 21UR-3904 |
| 2657504_adh | TTGGAATCAATTGTTGTTGGAA    | 22 | 1    | 21UR-3904 |
| 1786121_adh | TAAGGGTACCATTTTTTCTAC     | 21 | 7    | 21UR-3916 |
| 200641_adh  | AATAAGGGTACCATTTTTTCTAC   | 23 | 1    | 21UR-3916 |
| 2602304_adh | TTCGAAGGTCAACAAAATATT     | 21 | 17   | 21UR-3920 |
| 246902_adh  | AATTCGAAGGTCAACAAAATATT   | 23 | 1    | 21UR-3920 |
| 1849152_adh | TAGAGTGATATGTTGAGAACA     | 21 | 297  | 21UR-3926 |
| 1849153_adh | TAGAGTGATATGTTGAGAACAA    | 22 | 1    | 21UR-3926 |
| 1849154_adh | TAGAGTGATATGTTGAGAACAAAT  | 24 | 1    | 21UR-3926 |
| 1997060_adh | TCGAATACTTTAAAAATTCAA     | 21 | 15   | 21UR-3927 |
| 639556_adh  | ATCGAATACTTTAAAAATTCAA    | 22 | 1    | 21UR-3927 |
| 217072_adh  | AATCGAATACTTTAAAAATTCAA   | 23 | 1    | 21UR-3927 |
| 2648650_adh | TTGCAAGGATTTTGGTGATAA     | 21 | 656  | 21UR-3929 |
| 2648652_adh | TTGCAAGGATTTTGGTGATAAT    | 22 | 1    | 21UR-3929 |
| 1799506_adh | TAATGACGTTTTTTCCTCTGA     | 21 | 57   | 21UR-3937 |
| 1799507_adh | TAATGACGTTTTTTCCTCTGAA    | 22 | 8    | 21UR-3937 |

|             |                            |    |      |           |
|-------------|----------------------------|----|------|-----------|
| 2611322_adh | TTCGTAGCCTTGTGTCAGTTAAT    | 21 | 18   | 21UR-3949 |
| 247648_adh  | AATTCGTAGCCTTGTGTCAGTTAAT  | 23 | 1    | 21UR-3949 |
| 1767872_adh | TAACGACGTTGTATAGGAATA      | 21 | 648  | 21UR-3957 |
| 1767873_adh | TAACGACGTTGTATAGGAATAAAA   | 23 | 1    | 21UR-3957 |
| 1975995_adh | TCCAACACAGAAATTGCCAGG      | 21 | 6    | 21UR-3959 |
| 214658_adh  | AATCCAACACAGAAATTGCCAGG    | 23 | 1    | 21UR-3959 |
| 1877437_adh | TAGTGAATTCGGATTCGTTCT      | 21 | 252  | 21UR-3964 |
| 1877439_adh | TAGTGAATTCGGATTCGTTCTC     | 22 | 1    | 21UR-3964 |
| 2286867_adh | TGCACTTATTGAATCGACTGA      | 21 | 130  | 21UR-3971 |
| 2286868_adh | TGCACTTATTGAATCGACTGAA     | 22 | 1    | 21UR-3971 |
| 229306_adh  | AATGCACTTATTGAATCGACTGA    | 23 | 1    | 21UR-3971 |
| 2502645_adh | TGTGAAGTTGGGATAGGTATC      | 21 | 2389 | 21UR-3972 |
| 2502651_adh | TGTGAAGTTGGGATAGGTATCT     | 22 | 4    | 21UR-3972 |
| 2493292_adh | TGTATTGCATAAATGAACGGT      | 21 | 487  | 21UR-3979 |
| 2493293_adh | TGTATTGCATAAATGAACGGTT     | 22 | 1    | 21UR-3979 |
| 2493294_adh | TGTATTGCATAAATGAACGGTTAT   | 24 | 1    | 21UR-3979 |
| 2142430_adh | TGAATCGGTAATACTAGAATT      | 21 | 5593 | 21UR-4004 |
| 2142431_adh | TGAATCGGTAATACTAGAATTA     | 22 | 1    | 21UR-4004 |
| 224847_adh  | AATGAATCGGTAATACTAGAATT    | 23 | 1    | 21UR-4004 |
| 2142434_adh | TGAATCGGTAATACTAGAATTAGAC  | 25 | 1    | 21UR-4004 |
| 2318011_adh | TGGAATCATGAGAATACTTC       | 21 | 1550 | 21UR-4009 |
| 2318012_adh | TGGAATCATGAGAATACTTCA      | 22 | 1    | 21UR-4009 |
| 1878617_adh | TAGTGGAAATTTTGCTCGACGT     | 21 | 189  | 21UR-4021 |
| 1878619_adh | TAGTGGAAATTTTGCTCGACGTC    | 22 | 1    | 21UR-4021 |
| 1878620_adh | TAGTGGAAATTTTGCTCGACGTCAT  | 24 | 7    | 21UR-4021 |
| 1878621_adh | TAGTGGAAATTTTGCTCGACGTCATT | 25 | 2    | 21UR-4021 |
| 2184039_adh | TGAGACGCGAAACGACATAAT      | 21 | 1137 | 21UR-4027 |
| 2184041_adh | TGAGACGCGAAACGACATAATT     | 22 | 3    | 21UR-4027 |
| 226842_adh  | AATGAGACGCGAAACGACATAAT    | 23 | 2    | 21UR-4027 |
| 2184045_adh | TGAGACGCGAAACGACATAATTTG   | 24 | 1    | 21UR-4027 |
| 1889911_adh | TATATCAAGACCAGCCGCTGC      | 21 | 7    | 21UR-4030 |
| 1889912_adh | TATATCAAGACCAGCCGCTGCC     | 22 | 1    | 21UR-4030 |
| 2373575_adh | TGGACACAACACAAGAACCAA      | 21 | 5980 | 21UR-4031 |
| 2373576_adh | TGGACACAACACAAGAACCAAAA    | 22 | 14   | 21UR-4031 |
| 2657986_adh | TTGGACACAACACAAGAACCAA     | 22 | 1    | 21UR-4031 |
| 2373580_adh | TGGACACAACACAAGAACCAAAT    | 23 | 4    | 21UR-4031 |
| 2373581_adh | TGGACACAACACAAGAACCAAATT   | 24 | 3    | 21UR-4031 |
| 2373582_adh | TGGACACAACACAAGAACCAAATTTT | 26 | 1    | 21UR-4031 |
| 2469498_adh | TGGTCCTTGCTATAGCCGGC       | 21 | 44   | 21UR-4049 |
| 238964_adh  | AATGGTCCTTGCTATAGCCGGC     | 23 | 2    | 21UR-4049 |
| 2717116_adh | TTTGAGTGTTGATTTTGTCCA      | 21 | 22   | 21UR-4050 |
| 2717117_adh | TTTGAGTGTTGATTTTGTCCAGAT   | 24 | 1    | 21UR-4050 |
| 1866962_adh | TAGGCACTACATAACTGAACA      | 21 | 193  | 21UR-4058 |
| 1866963_adh | TAGGCACTACATAACTGAACAA     | 22 | 1    | 21UR-4058 |
| 2723597_adh | TTTGGAGACTTTATGCAGAAC      | 21 | 4331 | 21UR-4063 |
| 2723598_adh | TTTGGAGACTTTATGCAGAACA     | 22 | 21   | 21UR-4063 |
| 2723599_adh | TTTGGAGACTTTATGCAGAACAA    | 23 | 40   | 21UR-4063 |
| 2723600_adh | TTTGGAGACTTTATGCAGAACAAA   | 24 | 5    | 21UR-4063 |
| 2723601_adh | TTTGGAGACTTTATGCAGAACAAAA  | 25 | 1    | 21UR-4063 |
| 1847281_adh | TAGAGAATCCATAGCTGTTAC      | 21 | 11   | 21UR-4068 |

|             |                           |    |       |           |
|-------------|---------------------------|----|-------|-----------|
| 205637_adh  | AATAGAGAATCCATAGCTGTTAC   | 23 | 1     | 21UR-4068 |
| 2373906_adh | TGGACACTAGTGAATTATTGC     | 21 | 553   | 21UR-4073 |
| 1926863_adh | TATTGGACACTAGTGAATTATTGCT | 25 | 1     | 21UR-4073 |
| 2499364_adh | TGTCTCGCCAAGCAAGCCA       | 21 | 2     | 21UR-4076 |
| 241981_adh  | AATGTCTCGCCAAGCAAGCCA     | 23 | 1     | 21UR-4076 |
| 2310863_adh | TGCTTGATTGTTAAATTGGAT     | 21 | 1140  | 21UR-4085 |
| 2310864_adh | TGCTTGATTGTTAAATTGGATACAC | 25 | 1     | 21UR-4085 |
| 1941467_adh | TCAATCGAAGCAATCGAACTC     | 21 | 37    | 21UR-4091 |
| 1941468_adh | TCAATCGAAGCAATCGAACTCA    | 22 | 3     | 21UR-4091 |
| 2254298_adh | TGAGTGGTTGTAATTTGGTTG     | 21 | 434   | 21UR-4110 |
| 2254300_adh | TGAGTGGTTGTAATTTGGTTGGC   | 23 | 1     | 21UR-4110 |
| 227450_adh  | AATGAGTGGTTGTAATTTGGTTG   | 23 | 1     | 21UR-4110 |
| 1805455_adh | TAATTTGGTTGGTGTATGAAG     | 21 | 20    | 21UR-4126 |
| 1805456_adh | TAATTTGGTTGGTGTATGAAGC    | 22 | 1     | 21UR-4126 |
| 2306522_adh | TGCTATCTCGGCTTCAATCTA     | 21 | 160   | 21UR-4137 |
| 2306524_adh | TGCTATCTCGGCTTCAATCTAT    | 22 | 1     | 21UR-4137 |
| 230910_adh  | AATGCTATCTCGGCTTCAATCTA   | 23 | 1     | 21UR-4137 |
| 1887834_adh | TATACTTTGACATTGACGTTT     | 21 | 146   | 21UR-4141 |
| 1887836_adh | TATACTTTGACATTGACGTTCT    | 22 | 2     | 21UR-4141 |
| 2617090_adh | TTCTCTCGAAAGTTGGTTTTT     | 21 | 104   | 21UR-4146 |
| 2617091_adh | TTCTCTCGAAAGTTGGTTTTT     | 22 | 2     | 21UR-4146 |
| 1781917_adh | TAAGCAGAATGGAAACGATTT     | 21 | 45    | 21UR-4147 |
| 1781918_adh | TAAGCAGAATGGAAACGATTTAA   | 23 | 1     | 21UR-4147 |
| 2546056_adh | TTAACTCAGTCAAAGCGATCC     | 21 | 4     | 21UR-4149 |
| 702949_adh  | ATTAECTCAGTCAAAGCGATCC    | 22 | 1     | 21UR-4149 |
| 2591418_adh | TTCAGCGATCGAAAGACAACA     | 21 | 26402 | 21UR-4162 |
| 2591419_adh | TTCAGCGATCGAAAGACAACAA    | 22 | 7     | 21UR-4162 |
| 1725407_adh | GTTTCAGCGATCGAAAGACAACA   | 23 | 2     | 21UR-4162 |
| 2591420_adh | TTCAGCGATCGAAAGACAACAAA   | 24 | 1     | 21UR-4162 |
| 2591421_adh | TTCAGCGATCGAAAGACAACAAAAC | 25 | 1     | 21UR-4162 |
| 2667274_adh | TTGGGATCCAATGTGAAATGC     | 21 | 4     | 21UR-4190 |
| 2667275_adh | TTGGGATCCAATGTGAAATGCC    | 22 | 1     | 21UR-4190 |
| 731975_adh  | ATTGGGATCCAATGTGAAATGC    | 22 | 1     | 21UR-4190 |
| 2674184_adh | TTGTACACAAACATGTTAGGC     | 21 | 106   | 21UR-4208 |
| 2674186_adh | TTGTACACAAACATGTTAGGCC    | 22 | 1     | 21UR-4208 |
| 1782404_adh | TAAGCGACAAACCTTTAGTGA     | 21 | 24    | 21UR-4216 |
| 1782405_adh | TAAGCGACAAACCTTTAGTGAAA   | 23 | 1     | 21UR-4216 |
| 2305365_adh | TGCTAAGACAAGATGGGTAAA     | 21 | 186   | 21UR-4222 |
| 230859_adh  | AATGCTAAGACAAGATGGGTAAA   | 23 | 1     | 21UR-4222 |
| 2305367_adh | TGCTAAGACAAGATGGGTAAACAAT | 25 | 1     | 21UR-4222 |
| 2644965_adh | TTGATGCCTGCTATTAGAATT     | 21 | 240   | 21UR-4230 |
| 251036_adh  | AATTGATGCCTGCTATTAGAATT   | 23 | 1     | 21UR-4230 |
| 2644969_adh | TTGATGCCTGCTATTAGAATTCAT  | 24 | 1     | 21UR-4230 |
| 1924914_adh | TATTCTGACAAGCTATGCCCG     | 21 | 79    | 21UR-4231 |
| 1924916_adh | TATTCTGACAAGCTATGCCCGT    | 22 | 6     | 21UR-4231 |
| 1924917_adh | TATTCTGACAAGCTATGCCCGTGT  | 24 | 1     | 21UR-4231 |
| 2660852_adh | TTGGATAGACTAATTAGCAAG     | 21 | 449   | 21UR-4233 |
| 1113751_adh | CTTGGATAGACTAATTAGCAAG    | 22 | 1     | 21UR-4233 |
| 2660853_adh | TTGGATAGACTAATTAGCAAGA    | 22 | 1     | 21UR-4233 |
| 2660854_adh | TTGGATAGACTAATTAGCAAGACAT | 25 | 3     | 21UR-4233 |

|             |                            |    |      |           |
|-------------|----------------------------|----|------|-----------|
| 1845554_adh | TAGACTACAGAAATAGATTGG      | 21 | 106  | 21UR-4238 |
| 1845556_adh | TAGACTACAGAAATAGATTGGGAA   | 24 | 1    | 21UR-4238 |
| 1772072_adh | TAACTTAAGTAGATAAATGAT      | 21 | 1840 | 21UR-4264 |
| 1772075_adh | TAACTTAAGTAGATAAATGATGGA   | 24 | 2    | 21UR-4264 |
| 1772076_adh | TAACTTAAGTAGATAAATGATGGAAC | 26 | 1    | 21UR-4264 |
| 1889843_adh | TATATATGATTGTGATCCCTC      | 21 | 115  | 21UR-4274 |
| 1889844_adh | TATATATGATTGTGATCCCTCA     | 22 | 2    | 21UR-4274 |
| 1938257_adh | TCAAGAAGAATTTCAAATACA      | 21 | 140  | 21UR-4289 |
| 1938261_adh | TCAAGAAGAATTTCAAATACATAAC  | 25 | 1    | 21UR-4289 |
| 1938262_adh | TCAAGAAGAATTTCAAATACATAACT | 26 | 1    | 21UR-4289 |
| 2651989_adh | TTGCGACTTACGTTCTGTGCGG     | 21 | 178  | 21UR-4290 |
| 2651990_adh | TTGCGACTTACGTTCTGTGCGGA    | 22 | 3    | 21UR-4290 |
| 2651991_adh | TTGCGACTTACGTTCTGTGCGGAA   | 23 | 1    | 21UR-4290 |
| 2513508_adh | TGTGCAGTATGCAACTCTCAA      | 21 | 82   | 21UR-4304 |
| 2513509_adh | TGTGCAGTATGCAACTCTCAAT     | 22 | 2    | 21UR-4304 |
| 2285546_adh | TGCAATTGATCCCACAATTGA      | 21 | 14   | 21UR-4316 |
| 229175_adh  | AATGCAATTGATCCCACAATTGA    | 23 | 1    | 21UR-4316 |
| 2063200_adh | TCTTTTTGACTAACGGTTGA       | 21 | 137  | 21UR-4323 |
| 2063201_adh | TCTTTTTGACTAACGGTTGAA      | 22 | 1    | 21UR-4323 |
| 2063202_adh | TCTTTTTGACTAACGGTTGAAA     | 23 | 1    | 21UR-4323 |
| 1832420_adh | TACTGATGGCATTTTACATGG      | 21 | 516  | 21UR-4329 |
| 598704_adh  | ATACTGATGGCATTTTACATGG     | 22 | 1    | 21UR-4329 |
| 2257399_adh | TGAGTTTATTTGCACTAAAGT      | 21 | 10   | 21UR-4334 |
| 669103_adh  | ATGAGTTTATTTGCACTAAAGT     | 22 | 1    | 21UR-4334 |
| 1864470_adh | TAGGATAATAATAGGATGATA      | 21 | 1227 | 21UR-4349 |
| 1864474_adh | TAGGATAATAATAGGATGATAGGAG  | 25 | 2    | 21UR-4349 |
| 1912446_adh | TATGCACTTGAGTAAGCTAAC      | 21 | 6    | 21UR-4351 |
| 1912447_adh | TATGCACTTGAGTAAGCTAACTTCT  | 25 | 1    | 21UR-4351 |
| 1746907_adh | TAAAAATACATCGGAATCCAA      | 21 | 83   | 21UR-4355 |
| 1746908_adh | TAAAAATACATCGGAATCCAAAA    | 23 | 1    | 21UR-4355 |
| 1966361_adh | TCAGTCGTATGGGTTTATCCA      | 21 | 4    | 21UR-4364 |
| 1966362_adh | TCAGTCGTATGGGTTTATCCAAGT   | 24 | 1    | 21UR-4364 |
| 1779814_adh | TAAGATGAAGACATCGTTTGA      | 21 | 215  | 21UR-4371 |
| 1779815_adh | TAAGATGAAGACATCGTTTGAAA    | 23 | 4    | 21UR-4371 |
| 1779816_adh | TAAGATGAAGACATCGTTTGAAATAA | 26 | 1    | 21UR-4371 |
| 1763180_adh | TAACAACAAGGAATTTACAAC      | 21 | 36   | 21UR-4374 |
| 1763181_adh | TAACAACAAGGAATTTACAACA     | 22 | 1    | 21UR-4374 |
| 2389780_adh | TGGATCGCGGAAATATGCAAA      | 21 | 825  | 21UR-4382 |
| 2389781_adh | TGGATCGCGGAAATATGCAAAA     | 22 | 4    | 21UR-4382 |
| 2661497_adh | TTGGATCGCGGAAATATGCAAA     | 22 | 1    | 21UR-4382 |
| 2389782_adh | TGGATCGCGGAAATATGCAAAAA    | 23 | 5    | 21UR-4382 |
| 2389783_adh | TGGATCGCGGAAATATGCAAAAAAT  | 24 | 1    | 21UR-4382 |
| 1895015_adh | TATCATTGGTACACTAATTTCT     | 21 | 15   | 21UR-4406 |
| 1895016_adh | TATCATTGGTACACTAATTTCT     | 22 | 1    | 21UR-4406 |
| 208113_adh  | AATATCATTGGTACACTAATTTCT   | 23 | 1    | 21UR-4406 |
| 1895018_adh | TATCATTGGTACACTAATTTCTGC   | 24 | 1    | 21UR-4406 |
| 1833926_adh | TACTGTGATGGAAAAACGGTA      | 21 | 168  | 21UR-4407 |
| 1833927_adh | TACTGTGATGGAAAAACGGTAAA    | 23 | 1    | 21UR-4407 |
| 1938395_adh | TCAAGAATTACGGATGCCGCC      | 21 | 411  | 21UR-4415 |
| 1938396_adh | TCAAGAATTACGGATGCCGCCA     | 22 | 2    | 21UR-4415 |

|             |                            |    |      |           |
|-------------|----------------------------|----|------|-----------|
| 1938397_adh | TCAAGAATTACGGATGCCGCCAA    | 23 | 2    | 21UR-4415 |
| 1827493_adh | TACGGTTAATACGGTTAGGGG      | 21 | 99   | 21UR-4429 |
| 1827495_adh | TACGGTTAATACGGTTAGGGGTAA   | 24 | 1    | 21UR-4429 |
| 1757693_adh | TAAAGCTGGCTACCGTACTTC      | 21 | 241  | 21UR-4437 |
| 1757695_adh | TAAAGCTGGCTACCGTACTTCT     | 22 | 1    | 21UR-4437 |
| 1762209_adh | TAAATTCAAATTGCTTGAAGA      | 21 | 51   | 21UR-4447 |
| 1025748_adh | CTAAATTCAAATTGCTTGAAGA     | 22 | 1    | 21UR-4447 |
| 2469995_adh | TGGTCTAGTGGTATGTGCGGG      | 21 | 1201 | 21UR-4459 |
| 2469998_adh | TGGTCTAGTGGTATGTGCGGGC     | 22 | 5    | 21UR-4459 |
| 239029_adh  | AATGGTCTAGTGGTATGTGCGGG    | 23 | 1    | 21UR-4459 |
| 2469999_adh | TGGTCTAGTGGTATGTGCGGGCA    | 23 | 1    | 21UR-4459 |
| 2470000_adh | TGGTCTAGTGGTATGTGCGGGCAA   | 24 | 1    | 21UR-4459 |
| 2131329_adh | TGAAGCGACTAAAATTACAAC      | 21 | 168  | 21UR-4466 |
| 1064441_adh | CTGAAGCGACTAAAATTACAAC     | 22 | 1    | 21UR-4466 |
| 2131330_adh | TGAAGCGACTAAAATTACAACAT    | 23 | 1    | 21UR-4466 |
| 1835373_adh | TACTTGGATAGACTAATTAGC      | 21 | 233  | 21UR-4467 |
| 1835374_adh | TACTTGGATAGACTAATTAGCA     | 22 | 2    | 21UR-4467 |
| 1835375_adh | TACTTGGATAGACTAATTAGCAA    | 23 | 1    | 21UR-4467 |
| 1952980_adh | TCACGAAATTGTATTAAGTGG      | 21 | 134  | 21UR-4471 |
| 212796_adh  | AATCACGAAATTGTATTAAGTGG    | 23 | 2    | 21UR-4471 |
| 2614331_adh | TTCTACATCGTAGCGGAAATC      | 21 | 559  | 21UR-4474 |
| 2614332_adh | TTCTACATCGTAGCGGAAATCA     | 22 | 1    | 21UR-4474 |
| 2614333_adh | TTCTACATCGTAGCGGAAATCAA    | 23 | 1    | 21UR-4474 |
| 2038286_adh | TCTCATGACGGTTTCCATTTT      | 21 | 236  | 21UR-4485 |
| 221748_adh  | AATCTCATGACGGTTTCCATTTT    | 23 | 1    | 21UR-4485 |
| 2000276_adh | TCGACTCATTACAGCTGATTA      | 21 | 61   | 21UR-4497 |
| 2000278_adh | TCGACTCATTACAGCTGATTAT     | 22 | 1    | 21UR-4497 |
| 2000280_adh | TCGACTCATTACAGCTGATTATG    | 23 | 1    | 21UR-4497 |
| 2131439_adh | TGAAGCGGAAAATATAGAAAG      | 21 | 4872 | 21UR-4509 |
| 2131442_adh | TGAAGCGGAAAATATAGAAAGC     | 22 | 32   | 21UR-4509 |
| 2131443_adh | TGAAGCGGAAAATATAGAAAGCAT   | 24 | 2    | 21UR-4509 |
| 2131444_adh | TGAAGCGGAAAATATAGAAAGCATA  | 25 | 1    | 21UR-4509 |
| 1758574_adh | TAAAGTAGACGTTGCCATGAT      | 21 | 6382 | 21UR-4510 |
| 1758579_adh | TAAAGTAGACGTTGCCATGATT     | 22 | 7    | 21UR-4510 |
| 2541719_adh | TTAAAGTAGACGTTGCCATGAT     | 22 | 1    | 21UR-4510 |
| 1758585_adh | TAAAGTAGACGTTGCCATGATTT    | 23 | 1    | 21UR-4510 |
| 1758586_adh | TAAAGTAGACGTTGCCATGATTTT   | 24 | 3    | 21UR-4510 |
| 1758587_adh | TAAAGTAGACGTTGCCATGATTTTT  | 25 | 1    | 21UR-4510 |
| 1912079_adh | TATGATTGCGTAATTGTTTGA      | 21 | 67   | 21UR-4514 |
| 1912080_adh | TATGATTGCGTAATTGTTTGAAA    | 23 | 1    | 21UR-4514 |
| 1963184_adh | TCAGCTTAGTAAGTATTTTCA      | 21 | 7    | 21UR-4540 |
| 1963185_adh | TCAGCTTAGTAAGTATTTTCAT     | 22 | 1    | 21UR-4540 |
| 2659674_adh | TTGGAGCAACTTCGGTTTTAA      | 21 | 87   | 21UR-4543 |
| 252523_adh  | AATTGGAGCAACTTCGGTTTTAA    | 23 | 1    | 21UR-4543 |
| 2659675_adh | TTGGAGCAACTTCGGTTTTAACTGG  | 25 | 1    | 21UR-4543 |
| 1916456_adh | TATGGTATTTCTCCCTCTGTG      | 21 | 2    | 21UR-4544 |
| 1916457_adh | TATGGTATTTCTCCCTCTGTGCAACT | 26 | 1    | 21UR-4544 |
| 1874450_adh | TAGTAGATACTATAGTAGAAG      | 21 | 476  | 21UR-4545 |
| 1874451_adh | TAGTAGATACTATAGTAGAAGAAA   | 24 | 1    | 21UR-4545 |
| 1919035_adh | TATGTGGAGTAATGGTTGATG      | 21 | 967  | 21UR-4557 |

|             |                           |    |       |           |
|-------------|---------------------------|----|-------|-----------|
| 1919036_adh | TATGTGGAGTAATGGTTGATGA    | 22 | 9     | 21UR-4557 |
| 1919038_adh | TATGTGGAGTAATGGTTGATGAGA  | 24 | 1     | 21UR-4557 |
| 1880382_adh | TAGTTAGGACATAATATGATC     | 21 | 77    | 21UR-4568 |
| 1880384_adh | TAGTTAGGACATAATATGATCT    | 22 | 1     | 21UR-4568 |
| 1785854_adh | TAAGGGAATCAAATGTCTGAAT    | 21 | 24    | 21UR-4570 |
| 1785855_adh | TAAGGGAATCAAATGTCTGAATAAA | 25 | 1     | 21UR-4570 |
| 2171344_adh | TGACTGTATTTTGGTTTTTGG     | 21 | 12007 | 21UR-4572 |
| 2171351_adh | TGACTGTATTTTGGTTTTTGGT    | 22 | 6     | 21UR-4572 |
| 2171355_adh | TGACTGTATTTTGGTTTTTGGTG   | 23 | 1     | 21UR-4572 |
| 2171356_adh | TGACTGTATTTTGGTTTTTGGTGT  | 24 | 3     | 21UR-4572 |
| 2171357_adh | TGACTGTATTTTGGTTTTTGGTGTC | 25 | 1     | 21UR-4572 |
| 1911935_adh | TATGATTCCATTTTCGTCCCTCA   | 21 | 86    | 21UR-4573 |
| 1911936_adh | TATGATTCCATTTTCGTCCCTCAT  | 22 | 1     | 21UR-4573 |
| 1999743_adh | TCGACATAGATGGCTTGATG      | 21 | 993   | 21UR-4605 |
| 1999745_adh | TCGACATAGATGGCTTGATGT     | 22 | 3     | 21UR-4605 |
| 2034750_adh | TCTATGTTGAGGACGTCATTG     | 21 | 191   | 21UR-4611 |
| 652559_adh  | ATCTATGTTGAGGACGTCATTG    | 22 | 1     | 21UR-4611 |
| 1836648_adh | TAGAAAAATTTGCAATTGAAG     | 21 | 16    | 21UR-4618 |
| 205344_adh  | AATAGAAAAATTTGCAATTGAAG   | 23 | 1     | 21UR-4618 |
| 2638661_adh | TTGACTGTCTGAAGACCATTTC    | 21 | 5349  | 21UR-4621 |
| 1109438_adh | CTTGACTGTCTGAAGACCATTTC   | 22 | 4     | 21UR-4621 |
| 2638665_adh | TTGACTGTCTGAAGACCATTTC    | 22 | 10    | 21UR-4621 |
| 2638666_adh | TTGACTGTCTGAAGACCATTTC    | 23 | 2     | 21UR-4621 |
| 2638668_adh | TTGACTGTCTGAAGACCATTTC    | 24 | 7     | 21UR-4621 |
| 2638670_adh | TTGACTGTCTGAAGACCATTTC    | 25 | 1     | 21UR-4621 |
| 1849056_adh | TAGAGTCCAGTTGATGTCCAT     | 21 | 1028  | 21UR-4625 |
| 1849058_adh | TAGAGTCCAGTTGATGTCCATT    | 22 | 2     | 21UR-4625 |
| 2054596_adh | TCCTAGTATTGTGAGAAGGGT     | 21 | 199   | 21UR-4632 |
| 222906_adh  | AATCCTAGTATTGTGAGAAGGGT   | 23 | 1     | 21UR-4632 |
| 1884676_adh | TATAACGAGTAGTAGATGGTA     | 21 | 348   | 21UR-4647 |
| 1884678_adh | TATAACGAGTAGTAGATGGTAG    | 22 | 6     | 21UR-4647 |
| 1861934_adh | TAGGAATTGTGTTCCACCAACG    | 21 | 123   | 21UR-4649 |
| 1861935_adh | TAGGAATTGTGTTCCACCAACGA   | 22 | 1     | 21UR-4649 |
| 1861936_adh | TAGGAATTGTGTTCCACCAACGAA  | 23 | 1     | 21UR-4649 |
| 1770175_adh | TAAC TAGTGCAGTACACGGTG    | 21 | 433   | 21UR-4653 |
| 1770176_adh | TAAC TAGTGCAGTACACGGTGT   | 22 | 1     | 21UR-4653 |
| 2310435_adh | TGCTTCGAGCGGATAGTTAAT     | 21 | 841   | 21UR-4655 |
| 2310436_adh | TGCTTCGAGCGGATAGTTAATT    | 22 | 1     | 21UR-4655 |
| 1309001_adh | GATGCTTCGAGCGGATAGTTAATTT | 25 | 1     | 21UR-4655 |
| 2684337_adh | TTGTTGAAACGGTATGAAATT     | 21 | 7575  | 21UR-4659 |
| 2684338_adh | TTGTTGAAACGGTATGAAATTG    | 22 | 1     | 21UR-4659 |
| 735686_adh  | ATTGTTGAAACGGTATGAAATT    | 22 | 6     | 21UR-4659 |
| 253984_adh  | AATTGTTGAAACGGTATGAAATT   | 23 | 16    | 21UR-4659 |
| 2684339_adh | TTGTTGAAACGGTATGAAATTGT   | 23 | 1     | 21UR-4659 |
| 1988427_adh | TCCGTGAAGAGTTTCGGCGTA     | 21 | 97    | 21UR-4667 |
| 1049043_adh | CTCCGTGAAGAGTTTCGGCGTA    | 22 | 1     | 21UR-4667 |
| 1758322_adh | TAAAGTAATAAGAATGAGTAG     | 21 | 284   | 21UR-4668 |
| 199136_adh  | AATAAAGTAATAAGAATGAGTAG   | 23 | 1     | 21UR-4668 |
| 1823973_adh | TACGATCGTTGGGGGTGAGAA     | 21 | 77    | 21UR-4698 |
| 1823974_adh | TACGATCGTTGGGGGTGAGAAAT   | 23 | 1     | 21UR-4698 |

|             |                            |    |       |           |
|-------------|----------------------------|----|-------|-----------|
| 1776035_adh | TAAGACTAGCCTATAATTTAA      | 21 | 195   | 21UR-4709 |
| 200378_adh  | AATAAGACTAGCCTATAATTTAA    | 23 | 2     | 21UR-4709 |
| 2036916_adh | TCTCACAAATGGACTTTGGTG      | 21 | 2941  | 21UR-4711 |
| 2036917_adh | TCTCACAAATGGACTTTGGTGA     | 22 | 1     | 21UR-4711 |
| 2036918_adh | TCTCACAAATGGACTTTGGTGAA    | 23 | 1     | 21UR-4711 |
| 209791_adh  | AATCAACAATCACTATATCCACT    | 23 | 1     | 21UR-4716 |
| 1812422_adh | TACAGGAAGAAATGGCACTAC      | 21 | 339   | 21UR-4718 |
| 1812424_adh | TACAGGAAGAAATGGCACTACT     | 22 | 2     | 21UR-4718 |
| 2449698_adh | TGGGCAAAAAGTTAGGCAGGCA     | 21 | 124   | 21UR-4728 |
| 2449699_adh | TGGGCAAAAAGTTAGGCAGGCAC    | 22 | 1     | 21UR-4728 |
| 2449700_adh | TGGGCAAAAAGTTAGGCAGGCACGC  | 24 | 1     | 21UR-4728 |
| 1919452_adh | TATGTTGATCGTGTTAAATA       | 21 | 74    | 21UR-4729 |
| 618814_adh  | ATATGTTGATCGTGTTAAATA      | 22 | 1     | 21UR-4729 |
| 208821_adh  | AATATGTTGATCGTGTTAAATA     | 23 | 1     | 21UR-4729 |
| 1992937_adh | TCCTTCGGCTATATTTACAAT      | 21 | 2349  | 21UR-4730 |
| 1992938_adh | TCCTTCGGCTATATTTACAATA     | 22 | 1     | 21UR-4730 |
| 1918195_adh | TATGTATGTGATTCTAGGTGG      | 21 | 99    | 21UR-4737 |
| 1918196_adh | TATGTATGTGATTCTAGGTGGA     | 22 | 13    | 21UR-4737 |
| 1918197_adh | TATGTATGTGATTCTAGGTGGAA    | 23 | 3     | 21UR-4737 |
| 2151832_adh | TGACAATGACGTAGATTATAA      | 21 | 628   | 21UR-4744 |
| 225004_adh  | AATGACAATGACGTAGATTATAA    | 23 | 2     | 21UR-4744 |
| 1789070_adh | TAAGTTCAAAAAATTGTCAAG      | 21 | 9     | 21UR-4745 |
| 1028052_adh | CTAAGTTCAAAAAATTGTCAAG     | 22 | 1     | 21UR-4745 |
| 1808170_adh | TACAACGTAGAGTACTGGCTA      | 21 | 25460 | 21UR-4748 |
| 1808171_adh | TACAACGTAGAGTACTGGCTAA     | 22 | 211   | 21UR-4748 |
| 591641_adh  | ATACAACGTAGAGTACTGGCTA     | 22 | 3     | 21UR-4748 |
| 1808193_adh | TACAACGTAGAGTACTGGCTAAT    | 23 | 97    | 21UR-4748 |
| 1808194_adh | TACAACGTAGAGTACTGGCTAATA   | 24 | 2     | 21UR-4748 |
| 1808195_adh | TACAACGTAGAGTACTGGCTAATAA  | 25 | 2     | 21UR-4748 |
| 1808196_adh | TACAACGTAGAGTACTGGCTAATAAT | 26 | 8     | 21UR-4748 |
| 1786288_adh | TAAGGTACAGAATAGTTGAAA      | 21 | 549   | 21UR-4755 |
| 1786292_adh | TAAGGTACAGAATAGTTGAAATAA   | 24 | 1     | 21UR-4755 |
| 1786293_adh | TAAGGTACAGAATAGTTGAAATAAA  | 25 | 1     | 21UR-4755 |
| 1842283_adh | TAGAATGCTCGTAGATCTTGG      | 21 | 2450  | 21UR-4773 |
| 1033182_adh | CTAGAATGCTCGTAGATCTTGG     | 22 | 2     | 21UR-4773 |
| 1842287_adh | TAGAATGCTCGTAGATCTTGGT     | 22 | 22    | 21UR-4773 |
| 1842289_adh | TAGAATGCTCGTAGATCTTGGTCAA  | 25 | 1     | 21UR-4773 |
| 1842290_adh | TAGAATGCTCGTAGATCTTGGTCAAT | 26 | 1     | 21UR-4773 |
| 1994455_adh | TCGAAAAATTGGAATTGGACA      | 21 | 1078  | 21UR-4782 |
| 1994456_adh | TCGAAAAATTGGAATTGGACAA     | 22 | 1     | 21UR-4782 |
| 216909_adh  | AATCGAAAAATTGGAATTGGACA    | 23 | 2     | 21UR-4782 |
| 2495182_adh | TGTCAGTTGAAAATGTGCACT      | 21 | 129   | 21UR-4783 |
| 241125_adh  | AATGTCAGTTGAAAATGTGCACT    | 23 | 1     | 21UR-4783 |
| 2679539_adh | TTGTGACAGAACGCATTTTTT      | 21 | 2717  | 21UR-4797 |
| 1731172_adh | GTTTGTGACAGAACGCATTTTTT    | 23 | 4     | 21UR-4797 |
| 2679540_adh | TTGTGACAGAACGCATTTTTTAA    | 23 | 1     | 21UR-4797 |
| 2422707_adh | TGGGAGAATAGTAAGGACGTG      | 21 | 2317  | 21UR-4807 |
| 2422708_adh | TGGGAGAATAGTAAGGACGTGA     | 22 | 8     | 21UR-4807 |
| 688652_adh  | ATGGGAGAATAGTAAGGACGTG     | 22 | 1     | 21UR-4807 |
| 237908_adh  | AATGGGAGAATAGTAAGGACGTG    | 23 | 6     | 21UR-4807 |

|             |                            |    |      |           |
|-------------|----------------------------|----|------|-----------|
| 2422710_adh | TGGGAGAATAGTAAGGACGTGAT    | 23 | 3    | 21UR-4807 |
| 2167641_adh | TGACTCATCGAATTGCATAAT      | 21 | 183  | 21UR-4834 |
| 2167642_adh | TGACTCATCGAATTGCATAATA     | 22 | 1    | 21UR-4834 |
| 664977_adh  | ATGACTCATCGAATTGCATAAT     | 22 | 1    | 21UR-4834 |
| 2167643_adh | TGACTCATCGAATTGCATAATAA    | 23 | 1    | 21UR-4834 |
| 2167644_adh | TGACTCATCGAATTGCATAATAAAT  | 25 | 1    | 21UR-4834 |
| 1901152_adh | TATGAAACTACTTGCATTACC      | 21 | 10   | 21UR-4843 |
| 1901153_adh | TATGAAACTACTTGCATTACCGTGAT | 26 | 1    | 21UR-4843 |
| 1846156_adh | TAGACTTAGATAAAAGCTAAAC     | 21 | 44   | 21UR-4849 |
| 1846157_adh | TAGACTTAGATAAAAGCTAAACGACA | 25 | 1    | 21UR-4849 |
| 1813335_adh | TACATCAGCCGCTCGAAGAGG      | 21 | 242  | 21UR-4852 |
| 1813336_adh | TACATCAGCCGCTCGAAGAGGT     | 22 | 6    | 21UR-4852 |
| 593568_adh  | ATACATCAGCCGCTCGAAGAGG     | 22 | 1    | 21UR-4852 |
| 203239_adh  | AATACATCAGCCGCTCGAAGAGG    | 23 | 1    | 21UR-4852 |
| 1944994_adh | TCACAGCTATTTGGCAACACC      | 21 | 42   | 21UR-4855 |
| 1944995_adh | TCACAGCTATTTGGCAACACCT     | 22 | 1    | 21UR-4855 |
| 2604076_adh | TTCGAGTAGCATTTGAGTGGC      | 21 | 813  | 21UR-4857 |
| 2604077_adh | TTCGAGTAGCATTTGAGTGGCA     | 22 | 2    | 21UR-4857 |
| 2272183_adh | TGATGGACTTCTACTTGGAAA      | 21 | 232  | 21UR-4881 |
| 2272184_adh | TGATGGACTTCTACTTGGAAAA     | 22 | 4    | 21UR-4881 |
| 2036719_adh | TCTCAATTGGATAGCATAACA      | 21 | 349  | 21UR-4893 |
| 2036720_adh | TCTCAATTGGATAGCATAACAAA    | 23 | 2    | 21UR-4893 |
| 2036721_adh | TCTCAATTGGATAGCATAACAAAAG  | 25 | 1    | 21UR-4893 |
| 2663227_adh | TTGGATGGTTGAAGAAGGAGT      | 21 | 8978 | 21UR-4895 |
| 2663228_adh | TTGGATGGTTGAAGAAGGAGTA     | 22 | 4    | 21UR-4895 |
| 2663230_adh | TTGGATGGTTGAAGAAGGAGTAT    | 23 | 18   | 21UR-4895 |
| 2663231_adh | TTGGATGGTTGAAGAAGGAGTATC   | 24 | 2    | 21UR-4895 |
| 2663232_adh | TTGGATGGTTGAAGAAGGAGTATCG  | 25 | 3    | 21UR-4895 |
| 2663233_adh | TTGGATGGTTGAAGAAGGAGTATCGT | 26 | 6    | 21UR-4895 |
| 2708835_adh | TTTCGTCAGCATGGCTAGTAC      | 21 | 4    | 21UR-4902 |
| 1805013_adh | TAATTTTCGTCAGCATGGCTAGTAC  | 24 | 1    | 21UR-4902 |
| 2605141_adh | TTCGATGCACGCGCATGTACC      | 21 | 13   | 21UR-4908 |
| 2605142_adh | TTCGATGCACGCGCATGTACCC     | 22 | 1    | 21UR-4908 |
| 1999520_adh | TCGACAAAATGCAGGCAATGA      | 21 | 306  | 21UR-4953 |
| 217100_adh  | AATCGACAAAATGCAGGCAATGA    | 23 | 1    | 21UR-4953 |
| 1999521_adh | TCGACAAAATGCAGGCAATGAGGT   | 24 | 1    | 21UR-4953 |
| 1814345_adh | TACATTCGGGATTGTTGGTAA      | 21 | 634  | 21UR-4970 |
| 1814346_adh | TACATTCGGGATTGTTGGTAAAA    | 23 | 1    | 21UR-4970 |
| 1856572_adh | TAGCGATTGCAGAGTAAGATT      | 21 | 738  | 21UR-4976 |
| 1856574_adh | TAGCGATTGCAGAGTAAGATTT     | 22 | 1    | 21UR-4976 |
| 1856577_adh | TAGCGATTGCAGAGTAAGATTTT    | 23 | 1    | 21UR-4976 |
| 206165_adh  | AATAGCGATTGCAGAGTAAGATT    | 23 | 1    | 21UR-4976 |
| 2376044_adh | TGGACGACCTGGAGTAATAGA      | 21 | 168  | 21UR-4985 |
| 2376045_adh | TGGACGACCTGGAGTAATAGAA     | 22 | 2    | 21UR-4985 |
| 1882647_adh | TAGTTGTTTAGCGAAAATAGG      | 21 | 15   | 21UR-4989 |
| 1882648_adh | TAGTTGTTTAGCGAAAATAGGAG    | 23 | 1    | 21UR-4989 |
| 1853166_adh | TAGCAACTAAGAATCCGTTA       | 21 | 130  | 21UR-5023 |
| 604679_adh  | ATAGCAACTAAGAATCCGTTA      | 22 | 2    | 21UR-5023 |
| 1862447_adh | TAGGACAGTGGAACGAACGAT      | 21 | 13   | 21UR-5028 |
| 1862448_adh | TAGGACAGTGGAACGAACGATA     | 22 | 2    | 21UR-5028 |

|             |                            |    |       |           |
|-------------|----------------------------|----|-------|-----------|
| 1768292_adh | TAACGATACAGCCTTACATGT      | 21 | 45    | 21UR-5031 |
| 1768293_adh | TAACGATACAGCCTTACATGTA     | 22 | 2     | 21UR-5031 |
| 1888969_adh | TATAGTATGTTCCAGAGGTGG      | 21 | 37    | 21UR-5041 |
| 1888971_adh | TATAGTATGTTCCAGAGGTGGGCGG  | 25 | 1     | 21UR-5041 |
| 1937004_adh | TCAACGTATTGTATTCAACTT      | 21 | 47    | 21UR-5042 |
| 1937005_adh | TCAACGTATTGTATTCAACTTT     | 22 | 1     | 21UR-5042 |
| 2291724_adh | TGCCAAACTCCATTTAACGGC      | 21 | 329   | 21UR-5045 |
| 2291725_adh | TGCCAAACTCCATTTAACGGCT     | 22 | 1     | 21UR-5045 |
| 229605_adh  | AATGCCAAACTCCATTTAACGGC    | 23 | 1     | 21UR-5045 |
| 2469173_adh | TGGTCACACACAACAAGGCT       | 21 | 169   | 21UR-5052 |
| 2469174_adh | TGGTCACACACAACAAGGCTAA     | 23 | 1     | 21UR-5052 |
| 2513623_adh | TGTGCATTTCTCTGTTTCGTA      | 21 | 10    | 21UR-5061 |
| 2513624_adh | TGTGCATTTCTCTGTTTCGTA      | 23 | 1     | 21UR-5061 |
| 2275328_adh | TGATTCCATTGTATTGGCATA      | 21 | 80    | 21UR-5069 |
| 2275329_adh | TGATTCCATTGTATTGGCATAT     | 22 | 1     | 21UR-5069 |
| 228675_adh  | AATGATTCCATTGTATTGGCATA    | 23 | 1     | 21UR-5069 |
| 2003199_adh | TCGATATAACTGAACTTCAAAA     | 21 | 14    | 21UR-5092 |
| 2003200_adh | TCGATATAACTGAACTTCAAAA     | 22 | 1     | 21UR-5092 |
| 217536_adh  | AATCGATATAACTGAACTTCAAAA   | 23 | 1     | 21UR-5092 |
| 2678818_adh | TTGTCTCTGTGTGGGTATATC      | 21 | 164   | 21UR-5097 |
| 253623_adh  | AATTGTCTCTGTGTGGGTATATC    | 23 | 1     | 21UR-5097 |
| 2678821_adh | TTGTCTCTGTGTGGGTATATCTGT   | 24 | 2     | 21UR-5097 |
| 1870506_adh | TAGGTACTACTTTGAACTTGG      | 21 | 15    | 21UR-5101 |
| 1870507_adh | TAGGTACTACTTTGAACTTGGAA    | 22 | 1     | 21UR-5101 |
| 1922269_adh | TATTATCGTCTTCTGAGCATA      | 21 | 558   | 21UR-5105 |
| 1922270_adh | TATTATCGTCTTCTGAGCATAAGCG  | 25 | 1     | 21UR-5105 |
| 1922271_adh | TATTATCGTCTTCTGAGCATAAGCGC | 26 | 1     | 21UR-5105 |
| 1866600_adh | TAGGATTTCACTAGAAGAAGC      | 21 | 3176  | 21UR-5109 |
| 1866601_adh | TAGGATTTCACTAGAAGAAGCA     | 22 | 2     | 21UR-5109 |
| 1866603_adh | TAGGATTTCACTAGAAGAAGCAT    | 23 | 2     | 21UR-5109 |
| 1866604_adh | TAGGATTTCACTAGAAGAAGCATG   | 24 | 2     | 21UR-5109 |
| 1866605_adh | TAGGATTTCACTAGAAGAAGCATGCA | 26 | 1     | 21UR-5109 |
| 2402858_adh | TGGCACAATTGTATTCAATTT      | 21 | 17    | 21UR-5118 |
| 686179_adh  | ATGGCACAATTGTATTCAATTT     | 22 | 1     | 21UR-5118 |
| 1867117_adh | TAGGCCAAGTTCGGTTAGCTAA     | 21 | 87    | 21UR-5122 |
| 1867118_adh | TAGGCCAAGTTCGGTTAGCTAAT    | 22 | 1     | 21UR-5122 |
| 1867120_adh | TAGGCCAAGTTCGGTTAGCTAATGT  | 24 | 1     | 21UR-5122 |
| 1874827_adh | TAGTAGGTGTTCAAGTTAGGG      | 21 | 45    | 21UR-5143 |
| 1874829_adh | TAGTAGGTGTTCAAGTTAGGGC     | 22 | 1     | 21UR-5143 |
| 1883233_adh | TAGTTTGGTGACTAAGGAAGA      | 21 | 139   | 21UR-5156 |
| 1883234_adh | TAGTTTGGTGACTAAGGAAGAA     | 22 | 1     | 21UR-5156 |
| 1765746_adh | TAACATATATTTCTGATTA        | 21 | 140   | 21UR-5169 |
| 1765747_adh | TAACATATATTTCTGATTA        | 23 | 2     | 21UR-5169 |
| 2545795_adh | TTAACTAAAGAGCAGAATATG      | 21 | 4660  | 21UR-5170 |
| 243858_adh  | AATTAATAAGAGCAGAATATG      | 23 | 1     | 21UR-5170 |
| 2545796_adh | TTAACTAAAGAGCAGAATATGAA    | 23 | 2     | 21UR-5170 |
| 2545797_adh | TTAACTAAAGAGCAGAATATGAAGAT | 26 | 1     | 21UR-5170 |
| 1965615_adh | TCAGTAGAAGAAGACTCTCAA      | 21 | 20784 | 21UR-5174 |
| 1965616_adh | TCAGTAGAAGAAGACTCTCAA      | 22 | 3     | 21UR-5174 |
| 628442_adh  | ATCAGTAGAAGAAGACTCTCAA     | 22 | 2     | 21UR-5174 |

|             |                            |    |           |           |
|-------------|----------------------------|----|-----------|-----------|
| 1965617_adh | TCAGTAGAAGAAGACTCTCAAAA    | 23 | 16        | 21UR-5174 |
| 213619_adh  | AATCAGTAGAAGAAGACTCTCAA    | 23 | 25        | 21UR-5174 |
| 1965618_adh | TCAGTAGAAGAAGACTCTCAAAA    | 24 | 1         | 21UR-5174 |
| 777568_adh  | CAATCAGTAGAAGAAGACTCTCAA   | 24 | 1         | 21UR-5174 |
| 1965619_adh | TCAGTAGAAGAAGACTCTCAAAAAG  | 25 | 2         | 21UR-5174 |
| 1965620_adh | TCAGTAGAAGAAGACTCTCAAAAAGC | 26 | 1         | 21UR-5174 |
| 2699263_adh | TTTATGGTTAGAAAACTATA       | 21 | 76        | 21UR-5178 |
| 2699264_adh | TTTATGGTTAGAAAACTATAA      | 22 | 2         | 21UR-5178 |
| 2491306_adh | TGTATCGTCCAATGCTCCATC      | 21 | 28        | 21UR-5179 |
| 240862_adh  | AATGTATCGTCCAATGCTCCATC    | 23 | 1         | 21UR-5179 |
| 240863_adh  | AATGTATCGTCCAATGCTCCATCAT  | 25 | 1         | 21UR-5179 |
| 2271037_adh | TGATGAATAGGTGATTAGGGA      | 21 | 152       | 21UR-5180 |
| 2271039_adh | TGATGAATAGGTGATTAGGGAAT    | 23 | 1         | 21UR-5180 |
| 1785974_adh | TAAGGGAGTATGCTTAGTAGT      | 21 | 37        | 21UR-5188 |
| 587189_adh  | ATAAGGGAGTATGCTTAGTAGT     | 22 | 1         | 21UR-5188 |
| 1799407_adh | TAATGACAATGACGTAGATTA      | 21 | 282       | 21UR-5195 |
| 1799409_adh | TAATGACAATGACGTAGATTAT     | 22 | 2         | 21UR-5195 |
| 2646841_adh | TTGATTCGACAGTACTCAA        | 21 | 567       | 21UR-5197 |
| 2646842_adh | TTGATTCGACAGTACTCAAAA      | 22 | 3         | 21UR-5197 |
| 1988400_adh | TCCGTGAACTTTTTGCTTGC       | 21 | 10        | 21UR-5213 |
| 635385_adh  | ATCCGTGAACTTTTTGCTTGC      | 22 | 1         | 21UR-5213 |
| 2270435_adh | TGATCTGATTGAGAACGTGAA      | 21 | 101       | 21UR-5220 |
| 2270436_adh | TGATCTGATTGAGAACGTGAAA     | 22 | 4         | 21UR-5220 |
| 2052905_adh | TCTGTGTTCCGGTGGACTTTCA     | 21 | 2066      | 21UR-5226 |
| 2520855_adh | TGTGTTCCGGTGGACTTTCAA      | 21 | 1 355_x1/ | 21UR-5226 |
| 2052906_adh | TCTGTGTTCCGGTGGACTTTCAA    | 22 | 1         | 21UR-5226 |
| 2052907_adh | TCTGTGTTCCGGTGGACTTTCAA    | 23 | 1         | 21UR-5226 |
| 2060939_adh | TCTTTCGAGTACCATAGGACG      | 21 | 2794      | 21UR-5227 |
| 2060943_adh | TCTTTCGAGTACCATAGGACGT     | 22 | 9         | 21UR-5227 |
| 2060947_adh | TCTTTCGAGTACCATAGGACGTT    | 23 | 2         | 21UR-5227 |
| 2060948_adh | TCTTTCGAGTACCATAGGACGTTT   | 24 | 2         | 21UR-5227 |
| 1918767_adh | TATGTCGTTTTGAATCACATA      | 21 | 16        | 21UR-5231 |
| 208789_adh  | AATATGTCGTTTTGAATCACATA    | 23 | 1         | 21UR-5231 |
| 2479108_adh | TGGTTTTCCGGATTAAGCAAT      | 21 | 145       | 21UR-5236 |
| 2479109_adh | TGGTTTTCCGGATTAAGCAATACAC  | 25 | 2         | 21UR-5236 |
| 2719324_adh | TTTGATGTCCAAACGTTATTA      | 21 | 1         | 21UR-5244 |
| 256198_adh  | AATTTGATGTCCAAACGTTATTA    | 23 | 1         | 21UR-5244 |
| 1870074_adh | TAGGTAACGTGTAGGCGATGC      | 21 | 112       | 21UR-5246 |
| 1870075_adh | TAGGTAACGTGTAGGCGATGCA     | 22 | 1         | 21UR-5246 |
| 1944223_adh | TCACAAGGTAGAAAGCTATCA      | 21 | 354       | 21UR-5255 |
| 1944224_adh | TCACAAGGTAGAAAGCTATCACA    | 23 | 1         | 21UR-5255 |
| 2161184_adh | TGACGCAAACCTGTTTATTTCC     | 21 | 5         | 21UR-5256 |
| 226255_adh  | AATGACGCAAACCTGTTTATTTCC   | 23 | 1         | 21UR-5256 |
| 1772905_adh | TAACTTTGAACATGAAGTAAG      | 21 | 492       | 21UR-5271 |
| 1772906_adh | TAACTTTGAACATGAAGTAAGA     | 22 | 2         | 21UR-5271 |
| 1772910_adh | TAACTTTGAACATGAAGTAAGAC    | 23 | 2         | 21UR-5271 |
| 1772911_adh | TAACTTTGAACATGAAGTAAGACAT  | 25 | 1         | 21UR-5271 |
| 2635719_adh | TTGACGCAATCCTTAAAATCA      | 21 | 7         | 21UR-5273 |
| 249863_adh  | AATTGACGCAATCCTTAAAATCA    | 23 | 2         | 21UR-5273 |
| 2641877_adh | TTGAGTAGAAATGCAAGGTTG      | 21 | 361       | 21UR-5305 |

|             |                            |    |       |           |
|-------------|----------------------------|----|-------|-----------|
| 726289_adh  | ATTGAGTAGAAATGCAAGGTTG     | 22 | 1     | 21UR-5305 |
| 2641878_adh | TTGAGTAGAAATGCAAGGTTGAA    | 23 | 2     | 21UR-5305 |
| 1788061_adh | TAAGTCTCTTTGTCATGCATA      | 21 | 113   | 21UR-5307 |
| 200793_adh  | AATAAGTCTCTTTGTCATGCATA    | 23 | 1     | 21UR-5307 |
| 1967874_adh | TCAGTTTTGAACAGCGGTAAC      | 21 | 1687  | 21UR-5320 |
| 1967875_adh | TCAGTTTTGAACAGCGGTAACAA    | 23 | 2     | 21UR-5320 |
| 1967876_adh | TCAGTTTTGAACAGCGGTAACAAT   | 24 | 1     | 21UR-5320 |
| 2300751_adh | TGCGGAAGAATACCGAGTAGT      | 21 | 221   | 21UR-5322 |
| 2300752_adh | TGCGGAAGAATACCGAGTAGTT     | 22 | 1     | 21UR-5322 |
| 1825945_adh | TACGGAGATTGAACAAAAAAT      | 21 | 694   | 21UR-5329 |
| 1825947_adh | TACGGAGATTGAACAAAAAATC     | 22 | 3     | 21UR-5329 |
| 204097_adh  | AATACGGAGATTGAACAAAAAAT    | 23 | 2     | 21UR-5329 |
| 1924232_adh | TATTCGAATGTACATTTTCATC     | 21 | 24    | 21UR-5335 |
| 619966_adh  | ATATTGGAATGTACATTTTCATC    | 22 | 1     | 21UR-5335 |
| 2719976_adh | TTTGATTGACAGAATTGGGAT      | 21 | 6618  | 21UR-5338 |
| 1122585_adh | CTTTGATTGACAGAATTGGGAT     | 22 | 4     | 21UR-5338 |
| 2719981_adh | TTTGATTGACAGAATTGGGATT     | 22 | 10    | 21UR-5338 |
| 2719986_adh | TTTGATTGACAGAATTGGGATTTC   | 25 | 1     | 21UR-5338 |
| 2139779_adh | TGAATATGAGTATGACGGTAG      | 21 | 16882 | 21UR-5342 |
| 1065124_adh | CTGAATATGAGTATGACGGTAG     | 22 | 13    | 21UR-5342 |
| 2139796_adh | TGAATATGAGTATGACGGTAGT     | 22 | 116   | 21UR-5342 |
| 2139816_adh | TGAATATGAGTATGACGGTAGTT    | 23 | 11    | 21UR-5342 |
| 2139822_adh | TGAATATGAGTATGACGGTAGTTT   | 24 | 2     | 21UR-5342 |
| 2139824_adh | TGAATATGAGTATGACGGTAGTTTT  | 25 | 1     | 21UR-5342 |
| 2139825_adh | TGAATATGAGTATGACGGTAGTTTTT | 26 | 1     | 21UR-5342 |
| 2721094_adh | TTTGCAATTGGAGCAGTGGAA      | 21 | 1177  | 21UR-5350 |
| 2721096_adh | TTTGCAATTGGAGCAGTGGAAC     | 22 | 14    | 21UR-5350 |
| 2721098_adh | TTTGCAATTGGAGCAGTGGAACT    | 23 | 1     | 21UR-5350 |
| 1844214_adh | TAGAATTGGAAGACGAGAAAA      | 21 | 3258  | 21UR-5357 |
| 1844218_adh | TAGAATTGGAAGACGAGAAAAACT   | 25 | 1     | 21UR-5357 |
| 2034617_adh | TCTATGTACAACGGTTCTCTC      | 21 | 977   | 21UR-5385 |
| 2034618_adh | TCTATGTACAACGGTTCTCTCA     | 22 | 3     | 21UR-5385 |
| 2034619_adh | TCTATGTACAACGGTTCTCTCAA    | 23 | 2     | 21UR-5385 |
| 1812859_adh | TACAGTGTGAAAATGAAGGT       | 21 | 258   | 21UR-5389 |
| 1812860_adh | TACAGTGTGAAAATGAAGGTA      | 22 | 1     | 21UR-5389 |
| 203178_adh  | AATACAGTGTGAAAATGAAGGT     | 23 | 1     | 21UR-5389 |
| 2685724_adh | TTGTTGCACAGAATCAAAAAA      | 21 | 12    | 21UR-5394 |
| 254465_adh  | AATTGTTGCACAGAATCAAAAAA    | 23 | 1     | 21UR-5394 |
| 2571777_adh | TTAGTGCATTACCTCATATTC      | 21 | 40    | 21UR-5409 |
| 245040_adh  | AATTAGTGCATTACCTCATATTC    | 23 | 1     | 21UR-5409 |
| 2063087_adh | TCTTTTTGGAGTGTGGTCATC      | 21 | 2622  | 21UR-5410 |
| 2063088_adh | TCTTTTTGGAGTGTGGTCATCA     | 22 | 20    | 21UR-5410 |
| 2063089_adh | TCTTTTTGGAGTGTGGTCATCAA    | 23 | 2     | 21UR-5410 |
| 2063090_adh | TCTTTTTGGAGTGTGGTCATCAAA   | 24 | 1     | 21UR-5410 |
| 1775292_adh | TAAGACATCGGAACACAAATC      | 21 | 593   | 21UR-5413 |
| 1775297_adh | TAAGACATCGGAACACAAATCT     | 22 | 1     | 21UR-5413 |
| 1775299_adh | TAAGACATCGGAACACAAATCTTTG  | 25 | 1     | 21UR-5413 |
| 1926563_adh | TATTGCTAGATTTTGGGTCCC      | 21 | 291   | 21UR-5416 |
| 1926564_adh | TATTGCTAGATTTTGGGTCCCA     | 22 | 1     | 21UR-5416 |
| 2672506_adh | TTGGTTGAGATCTCACGCGGA      | 21 | 804   | 21UR-5426 |

|             |                             |    |      |           |
|-------------|-----------------------------|----|------|-----------|
| 2672507_adh | TTGGTTGAGATCTCACGCGGAA      | 22 | 14   | 21UR-5426 |
| 2672508_adh | TTGGTTGAGATCTCACGCGGAAA     | 23 | 7    | 21UR-5426 |
| 2622255_adh | TTCTTCTTCCTGATCGTTTGA       | 21 | 3743 | 21UR-5432 |
| 2622256_adh | TTCTTCTTCCTGATCGTTTGA       | 22 | 6    | 21UR-5432 |
| 2622258_adh | TTCTTCTTCCTGATCGTTTGAATT    | 24 | 4    | 21UR-5432 |
| 2697307_adh | TTTAGTGCATACAATGGAGAA       | 21 | 73   | 21UR-5435 |
| 2697308_adh | TTTAGTGCATACAATGGAGAAT      | 22 | 2    | 21UR-5435 |
| 739271_adh  | ATTTAGTGCATACAATGGAGAA      | 22 | 1    | 21UR-5435 |
| 2137395_adh | TGAATAATTCGGTGTTGTAGA       | 21 | 1220 | 21UR-5437 |
| 2137397_adh | TGAATAATTCGGTGTTGTAGAT      | 22 | 1    | 21UR-5437 |
| 2507152_adh | TGTGATAGGGAAATAAAGACG       | 21 | 1652 | 21UR-5450 |
| 2507153_adh | TGTGATAGGGAAATAAAGACGA      | 22 | 3    | 21UR-5450 |
| 2507155_adh | TGTGATAGGGAAATAAAGACGAT     | 23 | 8    | 21UR-5450 |
| 2584653_adh | TTATTTTTTCAGAGAGTCAGGA      | 21 | 305  | 21UR-5462 |
| 2584654_adh | TTATTTTTTCAGAGAGTCAGGAT     | 22 | 1    | 21UR-5462 |
| 245910_adh  | AATTATTTTTTCAGAGAGTCAGGA    | 23 | 2    | 21UR-5462 |
| 2584655_adh | TTATTTTTTCAGAGAGTCAGGATACA  | 25 | 1    | 21UR-5462 |
| 2740633_adh | TTTTGAACAATCGGAAACACA       | 21 | 567  | 21UR-5464 |
| 1124443_adh | CTTTTGAACAATCGGAAACACA      | 22 | 1    | 21UR-5464 |
| 2740634_adh | TTTTGAACAATCGGAAACACAA      | 22 | 1    | 21UR-5464 |
| 1927068_adh | TATTGGATTTAGATCTGGAGA       | 21 | 138  | 21UR-5486 |
| 1927069_adh | TATTGGATTTAGATCTGGAGAGA     | 23 | 1    | 21UR-5486 |
| 2670942_adh | TTGGTGCCTATTGCTAGAATC       | 21 | 48   | 21UR-5488 |
| 2670943_adh | TTGGTGCCTATTGCTAGAATCC      | 22 | 1    | 21UR-5488 |
| 253124_adh  | AATTGGTGCCTATTGCTAGAATC     | 23 | 1    | 21UR-5488 |
| 2702167_adh | TTTCAATTGTAGACTGAGGGC       | 21 | 6453 | 21UR-5503 |
| 2702172_adh | TTTCAATTGTAGACTGAGGGCT      | 22 | 1    | 21UR-5503 |
| 2670939_adh | TTGGTGCCTACTACTGGAATC       | 21 | 33   | 21UR-5522 |
| 253123_adh  | AATTGGTGCCTACTACTGGAATC     | 23 | 1    | 21UR-5522 |
| 2740484_adh | TTTTGAAAAGCTGACAGGGGG       | 21 | 927  | 21UR-5525 |
| 2740488_adh | TTTTGAAAAGCTGACAGGGGGT      | 22 | 8    | 21UR-5525 |
| 747154_adh  | ATTTTGAAAAGCTGACAGGGGG      | 22 | 1    | 21UR-5525 |
| 2740489_adh | TTTTGAAAAGCTGACAGGGGGTA     | 23 | 1    | 21UR-5525 |
| 2740490_adh | TTTTGAAAAGCTGACAGGGGGTAAT   | 25 | 1    | 21UR-5525 |
| 1996015_adh | TCGAAGACTCAAAAGTGTAAGA      | 21 | 506  | 21UR-5527 |
| 1996020_adh | TCGAAGACTCAAAAGTGTAAGAC     | 22 | 2    | 21UR-5527 |
| 1996021_adh | TCGAAGACTCAAAAGTGTAAGACA    | 23 | 1    | 21UR-5527 |
| 1996022_adh | TCGAAGACTCAAAAGTGTAAGACAGT  | 25 | 5    | 21UR-5527 |
| 1996023_adh | TCGAAGACTCAAAAGTGTAAGACAGTT | 26 | 1    | 21UR-5527 |
| 2307583_adh | TGCTCGTCTAATTTGGTAAGA       | 21 | 25   | 21UR-5541 |
| 230974_adh  | AATGCTCGTCTAATTTGGTAAGA     | 23 | 1    | 21UR-5541 |
| 2146099_adh | TGAATTCGGCTGATTATTATC       | 21 | 1236 | 21UR-5543 |
| 2146101_adh | TGAATTCGGCTGATTATTATCT      | 22 | 2    | 21UR-5543 |
| 2707792_adh | TTTCGGATCGAAAGTAATACT       | 21 | 607  | 21UR-5548 |
| 2707793_adh | TTTCGGATCGAAAGTAATACTA      | 22 | 1    | 21UR-5548 |
| 2707794_adh | TTTCGGATCGAAAGTAATACTAA     | 23 | 2    | 21UR-5548 |
| 2369299_adh | TGGAATTCACATGTGGAATTT       | 21 | 71   | 21UR-5552 |
| 2369300_adh | TGGAATTCACATGTGGAATTTA      | 22 | 1    | 21UR-5552 |
| 232244_adh  | AATGGAATTCACATGTGGAATTT     | 23 | 1    | 21UR-5552 |
| 1958806_adh | TCAGAGATCAAACATACATAGG      | 21 | 7    | 21UR-5564 |

|             |                            |    |      |           |
|-------------|----------------------------|----|------|-----------|
| 627406_adh  | ATCAGAGATCAAACACTACATAGG   | 22 | 1    | 21UR-5564 |
| 2719435_adh | TTTGATGTACTGGAATATGG       | 21 | 1904 | 21UR-5574 |
| 2719436_adh | TTTGATGTACTGGAATATGGA      | 22 | 19   | 21UR-5574 |
| 2719437_adh | TTTGATGTACTGGAATATGGAA     | 23 | 3    | 21UR-5574 |
| 2719438_adh | TTTGATGTACTGGAATATGGAAA    | 24 | 1    | 21UR-5574 |
| 2719774_adh | TTTGATTCCATTAGGTCATCA      | 21 | 5    | 21UR-5588 |
| 742987_adh  | ATTTGATTCCATTAGGTCATCA     | 22 | 1    | 21UR-5588 |
| 256202_adh  | AATTTGATTCCATTAGGTCATCA    | 23 | 1    | 21UR-5588 |
| 2645638_adh | TTGATGTTGCACCAGGTGGAA      | 21 | 88   | 21UR-5599 |
| 2719540_adh | TTTGATGTTGCACCAGGTGGAA     | 22 | 1    | 21UR-5599 |
| 2037181_adh | TCTCACTCAAGTTCAGACGGT      | 21 | 163  | 21UR-5607 |
| 2037182_adh | TCTCACTCAAGTTCAGACGGTAA    | 23 | 1    | 21UR-5607 |
| 2037183_adh | TCTCACTCAAGTTCAGACGGTAATAA | 26 | 1    | 21UR-5607 |
| 2540936_adh | TTAAAGAGAAGAACGATTA        | 21 | 1054 | 21UR-5610 |
| 2540937_adh | TTAAAGAGAAGAACGATTA        | 23 | 4    | 21UR-5610 |
| 2617529_adh | TTCTCTCAAGTAGATATCGG       | 21 | 276  | 21UR-5638 |
| 2617530_adh | TTCTCTCAAGTAGATATCGGA      | 22 | 2    | 21UR-5638 |
| 1826144_adh | TACGGATTCAGTCAACAGTTT      | 21 | 276  | 21UR-5649 |
| 1826145_adh | TACGGATTCAGTCAACAGTTTT     | 22 | 2    | 21UR-5649 |
| 2727460_adh | TTTGACGGTGCATTATGTAT       | 21 | 185  | 21UR-5665 |
| 256820_adh  | AATTTGACGGTGCATTATGTAT     | 23 | 2    | 21UR-5665 |
| 2642051_adh | TTGAGTAGTTAAAATGAGCAT      | 21 | 8769 | 21UR-5675 |
| 2642052_adh | TTGAGTAGTTAAAATGAGCATAA    | 23 | 9    | 21UR-5675 |
| 2642054_adh | TTGAGTAGTTAAAATGAGCATAAG   | 24 | 1    | 21UR-5675 |
| 2642055_adh | TTGAGTAGTTAAAATGAGCATAAGT  | 25 | 4    | 21UR-5675 |
| 2722725_adh | TTTGCTTGAATCGTCACTTT       | 21 | 239  | 21UR-5681 |
| 1122839_adh | CTTTGCTTGAATCGTCACTTT      | 22 | 2    | 21UR-5681 |
| 2590368_adh | TTCAGAAGAAGAAATTTGGAA      | 21 | 460  | 21UR-5718 |
| 2590370_adh | TTCAGAAGAAGAAATTTGGAA      | 23 | 1    | 21UR-5718 |
| 2724859_adh | TTTGGGCTGATTTGTCGGAAA      | 21 | 191  | 21UR-5728 |
| 2724860_adh | TTTGGGCTGATTTGTCGGAAA      | 26 | 1    | 21UR-5728 |
| 2614043_adh | TTCTAATCGGTCTCAATCAAT      | 21 | 155  | 21UR-5732 |
| 248725_adh  | AATTCTAATCGGTCTCAATCAAT    | 23 | 1    | 21UR-5732 |
| 2307421_adh | TGCTCGAGAATACAACGAAAA      | 21 | 46   | 21UR-5743 |
| 2307423_adh | TGCTCGAGAATACAACGAAAA      | 22 | 1    | 21UR-5743 |
| 2611122_adh | TTCGTACGTTGGAAGCTAAAT      | 21 | 1087 | 21UR-5758 |
| 2611123_adh | TTCGTACGTTGGAAGCTAAATA     | 22 | 2    | 21UR-5758 |
| 2611125_adh | TTCGTACGTTGGAAGCTAAATAT    | 23 | 1    | 21UR-5758 |
| 2159350_adh | TGACCAAAACTCTCGGCATTT      | 21 | 348  | 21UR-5760 |
| 1066014_adh | CTGACCAAAACTCTCGGCATTT     | 22 | 1    | 21UR-5760 |
| 2159353_adh | TGACCAAAACTCTCGGCATTT      | 24 | 2    | 21UR-5760 |
| 2159356_adh | TGACCAAAACTCTCGGCATTT      | 25 | 1    | 21UR-5760 |
| 2159357_adh | TGACCAAAACTCTCGGCATTT      | 26 | 1    | 21UR-5760 |
| 2035360_adh | TCTCAAATTGATCTGTTGAGG      | 21 | 17   | 21UR-5800 |
| 221568_adh  | AATCTCAAATTGATCTGTTGAGG    | 23 | 6    | 21UR-5800 |
| 2742184_adh | TTTTGCACGGTTTCGATTA        | 21 | 211  | 21UR-5810 |
| 2742185_adh | TTTTGCACGGTTTCGATTA        | 22 | 1    | 21UR-5810 |
| 1830029_adh | TACTAGAGAAGTAGAAGTCAT      | 21 | 4118 | 21UR-5858 |
| 1847229_adh | TAGAGAAGTAGAAGTCATTTG      | 21 | 134  | 21UR-5858 |
| 1830033_adh | TACTAGAGAAGTAGAAGTCATT     | 22 | 2    | 21UR-5858 |

|             |                            |    |      |           |
|-------------|----------------------------|----|------|-----------|
| 597710_adh  | ATACTAGAGAAGTAGAAGTCAT     | 22 | 3    | 21UR-5858 |
| 204508_adh  | AATACTAGAGAAGTAGAAGTCAT    | 23 | 3    | 21UR-5858 |
| 1830037_adh | TACTAGAGAAGTAGAAGTCATTTGC  | 25 | 1    | 21UR-5858 |
| 1865007_adh | TAGGATATAGAATGAATCATT      | 21 | 35   | 21UR-5878 |
| 1865008_adh | TAGGATATAGAATGAATCATTAA    | 23 | 2    | 21UR-5878 |
| 2167932_adh | TGACTCGATAGATTGCTCACT      | 21 | 43   | 21UR-5883 |
| 226560_adh  | AATGACTCGATAGATTGCTCACT    | 23 | 1    | 21UR-5883 |
| 1868608_adh | TAGGGATATTGCTAGGAAGAC      | 21 | 1859 | 21UR-5886 |
| 1868609_adh | TAGGGATATTGCTAGGAAGACA     | 22 | 1    | 21UR-5886 |
| 1868610_adh | TAGGGATATTGCTAGGAAGACAC    | 23 | 1    | 21UR-5886 |
| 206791_adh  | AATAGGGATATTGCTAGGAAGAC    | 23 | 1    | 21UR-5886 |
| 1868611_adh | TAGGGATATTGCTAGGAAGACACA   | 24 | 2    | 21UR-5886 |
| 1868612_adh | TAGGGATATTGCTAGGAAGACACAA  | 25 | 2    | 21UR-5886 |
| 1868613_adh | TAGGGATATTGCTAGGAAGACACAAC | 26 | 2    | 21UR-5886 |
| 1860596_adh | TAGGAAAGTATGTAGGAAAGT      | 21 | 841  | 21UR-5897 |
| 1860597_adh | TAGGAAAGTATGTAGGAAAGTAA    | 23 | 4    | 21UR-5897 |
| 1860598_adh | TAGGAAAGTATGTAGGAAAGTAAAGT | 26 | 1    | 21UR-5897 |
| 2290769_adh | TGCATGGGCGGATTTTCAGTTT     | 21 | 89   | 21UR-5913 |
| 229566_adh  | AATGCATGGGCGGATTTTCAGTTT   | 23 | 1    | 21UR-5913 |
| 2285959_adh | TGCACACACGAGGTACGGCAT      | 21 | 151  | 21UR-5921 |
| 2285960_adh | TGCACACACGAGGTACGGCATT     | 22 | 2    | 21UR-5921 |
| 2562548_adh | TTAGAGAGAGTTTCGGAAATT      | 21 | 91   | 21UR-5929 |
| 706624_adh  | ATTAGAGAGAGTTTCGGAAATT     | 22 | 1    | 21UR-5929 |
| 1835336_adh | TACTTGGACAGATGAAGTTTT      | 21 | 108  | 21UR-5934 |
| 600712_adh  | ATACTTGGACAGATGAAGTTTT     | 22 | 2    | 21UR-5934 |
| 2539584_adh | TTAAACAGTGAATTAGGAAT       | 21 | 916  | 21UR-5937 |
| 2539587_adh | TTAAACAGTGAATTAGGAATT      | 22 | 3    | 21UR-5937 |
| 2609266_adh | TTCGGGGCACGAACGGTTAAT      | 21 | 358  | 21UR-5941 |
| 2609267_adh | TTCGGGGCACGAACGGTTAATT     | 22 | 4    | 21UR-5941 |
| 2609268_adh | TTCGGGGCACGAACGGTTAATTAT   | 24 | 1    | 21UR-5941 |
| 1891799_adh | TATCACAATGCAGCTAGAATT      | 21 | 373  | 21UR-5946 |
| 1891800_adh | TATCACAATGCAGCTAGAATTAA    | 23 | 2    | 21UR-5946 |
| 208038_adh  | AATATCACAATGCAGCTAGAATT    | 23 | 1    | 21UR-5946 |
| 2616254_adh | TTCTCCAGTTGACTCTATTTTC     | 21 | 689  | 21UR-5950 |
| 2616255_adh | TTCTCCAGTTGACTCTATTTCAA    | 23 | 1    | 21UR-5950 |
| 2031645_adh | TCTACGGAGCAAGAGGGAAAA      | 21 | 200  | 21UR-5953 |
| 2031646_adh | TCTACGGAGCAAGAGGGAAAAT     | 22 | 1    | 21UR-5953 |
| 2031647_adh | TCTACGGAGCAAGAGGGAAAAATA   | 24 | 1    | 21UR-5953 |
| 1836300_adh | TACTTTGATTATTCCGGCTTC      | 21 | 46   | 21UR-5961 |
| 1836302_adh | TACTTTGATTATTCCGGCTTCT     | 22 | 1    | 21UR-5961 |
| 2046452_adh | TCTGAGTAGCAATTTTTGAAA      | 21 | 951  | 21UR-5975 |
| 2046457_adh | TCTGAGTAGCAATTTTTGAAAG     | 22 | 1    | 21UR-5975 |
| 2046458_adh | TCTGAGTAGCAATTTTTGAAAGG    | 23 | 2    | 21UR-5975 |
| 2046459_adh | TCTGAGTAGCAATTTTTGAAAGGA   | 24 | 4    | 21UR-5975 |
| 2046460_adh | TCTGAGTAGCAATTTTTGAAAGGAA  | 25 | 1    | 21UR-5975 |
| 2728674_adh | TTTGTC AAGATAGAAGATAGT     | 21 | 656  | 21UR-6008 |
| 2728677_adh | TTTGTC AAGATAGAAGATAGTT    | 22 | 3    | 21UR-6008 |
| 256850_adh  | AATTTGTC AAGATAGAAGATAGT   | 23 | 1    | 21UR-6008 |
| 2182205_adh | TGAGACAAGAATACTTATTCA      | 21 | 252  | 21UR-6020 |
| 2182206_adh | TGAGACAAGAATACTTATTCACAA   | 24 | 1    | 21UR-6020 |

|             |                            |    |         |           |
|-------------|----------------------------|----|---------|-----------|
| 2624026_adh | TTCTTTTTGGAGTGTGGTCAT      | 21 | 129     | 21UR-6041 |
| 249354_adh  | AATTCTTTTTGGAGTGTGGTCAT    | 23 | 1       | 21UR-6041 |
| 1961782_adh | TCAGATTGGAATTAATAATTGG     | 21 | 18      | 21UR-6045 |
| 1961783_adh | TCAGATTGGAATTAATAATTGGT    | 22 | 1       | 21UR-6045 |
| 2505635_adh | TGTGAGAAGGGAATTTGTCGA      | 21 | 64      | 21UR-6059 |
| 2505636_adh | TGTGAGAAGGGAATTTGTCGAA     | 22 | 4       | 21UR-6059 |
| 734620_adh  | ATTGTGAGAAGGGAATTTGTCGAAAA | 26 | 1       | 21UR-6059 |
| 2055987_adh | TCTTCGAAGGCATTATTTTCT      | 21 | 108     | 21UR-6062 |
| 222961_adh  | AATCTTCGAAGGCATTATTTTCT    | 23 | 1       | 21UR-6062 |
| 1854798_adh | TAGCAGTTCGAGGAAATAAAA      | 21 | 15      | 21UR-6077 |
| 1854800_adh | TAGCAGTTCGAGGAAATAAAAAGT   | 23 | 1       | 21UR-6077 |
| 1780884_adh | TAAGATTGTTAGAGAAATTGG      | 21 | 1395    | 21UR-6085 |
| 1026869_adh | CTAAGATTGTTAGAGAAATTGG     | 22 | 1       | 21UR-6085 |
| 1780889_adh | TAAGATTGTTAGAGAAATTGGG     | 22 | 5       | 21UR-6085 |
| 1780892_adh | TAAGATTGTTAGAGAAATTGGGTTT  | 25 | 1       | 21UR-6085 |
| 2605985_adh | TTCGATTTTGAGAAAAGTGGC      | 21 | 3263    | 21UR-6098 |
| 1103456_adh | CTTCGATTTTGAGAAAAGTGGC     | 22 | 1       | 21UR-6098 |
| 2605988_adh | TTCGATTTTGAGAAAAGTGGCC     | 22 | 2       | 21UR-6098 |
| 2689517_adh | TTTAAATGGGCAGAAAAAAGT      | 21 | 133     | 21UR-6106 |
| 254646_adh  | AATTTAAATGGGCAGAAAAAAGT    | 23 | 1       | 21UR-6106 |
| 2711241_adh | TTTCTTAGGGCTTTTGGCAA       | 21 | 856     | 21UR-6123 |
| 2711244_adh | TTTCTTAGGGCTTTTGGCAAAT     | 22 | 1       | 21UR-6123 |
| 2739988_adh | TTTTCTTAGGGCTTTTGGCAA      | 22 | 1       | 21UR-6123 |
| 2739990_adh | TTTTCTTAGGGCTTTTGGCAAAT    | 23 | 1       | 21UR-6123 |
| 2739991_adh | TTTTCTTAGGGCTTTTGGCAAATT   | 24 | 1       | 21UR-6123 |
| 2739992_adh | TTTTCTTAGGGCTTTTGGCAAATTT  | 25 | 1       | 21UR-6123 |
| 2742125_adh | TTTTGCAAGGATATATACGGA      | 21 | 125     | 21UR-6156 |
| 2721033_adh | TTTGCAAGGATATATACGGAT      | 21 | 1033_x1 | 21UR-6156 |
| 2742128_adh | TTTTGCAAGGATATATACGGAT     | 22 | 5       | 21UR-6156 |
| 747497_adh  | ATTTTGCAAGGATATATACGGA     | 22 | 1       | 21UR-6156 |
| 2741471_adh | TTTTGAGTCTAATGAAACAAT      | 21 | 1       | 21UR-6157 |
| 257450_adh  | AATTTTGAGTCTAATGAAACAAT    | 23 | 1       | 21UR-6157 |
| 2712406_adh | TTTGAAAAGCTGACAGGGGGT      | 21 | 470     | 21UR-6159 |
| 2712407_adh | TTTGAAAAGCTGACAGGGGGTA     | 22 | 1       | 21UR-6159 |
| 2712408_adh | TTTGAAAAGCTGACAGGGGGTAA    | 23 | 3       | 21UR-6159 |
| 2712409_adh | TTTGAAAAGCTGACAGGGGGTAAT   | 24 | 2       | 21UR-6159 |
| 2623045_adh | TTCTTGATTAAACCGTGAAA       | 21 | 3       | 21UR-6196 |
| 249317_adh  | AATTCTTGATTAAACCGTGAAA     | 23 | 1       | 21UR-6196 |
| 1883560_adh | TAGTTTTTATCCGGACAACCT      | 21 | 859     | 21UR-6202 |
| 207666_adh  | AATAGTTTTTATCCGGACAACCT    | 23 | 3       | 21UR-6202 |
| 1827279_adh | TACGGTCAATTATTTAAACTC      | 21 | 105     | 21UR-6203 |
| 1827280_adh | TACGGTCAATTATTTAAACTCA     | 22 | 4       | 21UR-6203 |
| 204169_adh  | AATACGGTCAATTATTTAAACTC    | 23 | 1       | 21UR-6203 |
| 1869952_adh | TAGGGTTGATGAGTTAAGTTT      | 21 | 348     | 21UR-6207 |
| 1869953_adh | TAGGGTTGATGAGTTAAGTTTT     | 22 | 2       | 21UR-6207 |
| 2008294_adh | TCGCTACGCTTTTTCTTTTA       | 21 | 5       | 21UR-6292 |
| 218977_adh  | AATCGCTACGCTTTTTCTTTTA     | 23 | 1       | 21UR-6292 |
| 2698219_adh | TTTATATATCGTGTTGACTTA      | 21 | 241     | 21UR-6328 |
| 739394_adh  | ATTTATATATCGTGTTGACTTA     | 22 | 1       | 21UR-6328 |
| 2606572_adh | TTCGCGAGGGCGCTTTTTACC      | 21 | 49      | 21UR-6359 |

|             |                            |    |      |           |
|-------------|----------------------------|----|------|-----------|
| 247301_adh  | AATTCGCGAGGGCGCTTTTTACC    | 23 | 1    | 21UR-6359 |
| 2373288_adh | TGGACAAATTATAAGGAGACA      | 21 | 726  | 21UR-6364 |
| 2373289_adh | TGGACAAATTATAAGGAGACACTGT  | 25 | 1    | 21UR-6364 |
| 1783447_adh | TAAGCTCTCGGAATTTTCTTA      | 21 | 39   | 21UR-6367 |
| 1783448_adh | TAAGCTCTCGGAATTTTCTTAAA    | 23 | 1    | 21UR-6367 |
| 1854572_adh | TAGCAGCCTCTTAACTACAAA      | 21 | 17   | 21UR-6386 |
| 1854573_adh | TAGCAGCCTCTTAACTACAAAATTTG | 26 | 1    | 21UR-6386 |
| 2490518_adh | TGTATAGAAGTCCGGATGATC      | 21 | 132  | 21UR-6394 |
| 695363_adh  | ATGTATAGAAGTCCGGATGATC     | 22 | 1    | 21UR-6394 |
| 2744939_adh | TTTTTACGTATCTGATTTCCA      | 21 | 51   | 21UR-6405 |
| 257592_adh  | AATTTTTACGTATCTGATTTCCA    | 23 | 1    | 21UR-6405 |
| 2582429_adh | TTATTGCAGAATATGGACTAC      | 21 | 2628 | 21UR-6409 |
| 1100094_adh | CTTATTGCAGAATATGGACTAC     | 22 | 5    | 21UR-6409 |
| 2582430_adh | TTATTGCAGAATATGGACTACA     | 22 | 2    | 21UR-6409 |
| 2582431_adh | TTATTGCAGAATATGGACTACAA    | 23 | 8    | 21UR-6409 |
| 1923766_adh | TATTCATATGGTAGAAAAAAG      | 21 | 162  | 21UR-6417 |
| 1923767_adh | TATTCATATGGTAGAAAAAAGC     | 22 | 3    | 21UR-6417 |
| 1923768_adh | TATTCATATGGTAGAAAAAAGCAT   | 24 | 1    | 21UR-6417 |
| 2714388_adh | TTTGAATGTCGGCAACGTTTC      | 21 | 645  | 21UR-6424 |
| 1422957_adh | GCTTTGAATGTCGGCAACGTTTCCT  | 25 | 1    | 21UR-6424 |
| 1850807_adh | TAGATCCAAATTAATCGGCAT      | 21 | 373  | 21UR-6443 |
| 205777_adh  | AATAGATCCAAATTAATCGGCAT    | 23 | 2    | 21UR-6443 |
| 1804130_adh | TAATTGGTTCGAGATAAACTTT     | 21 | 11   | 21UR-6445 |
| 202725_adh  | AATAATTGGTCGAGATAAACTTT    | 23 | 1    | 21UR-6445 |
| 1777885_adh | TAAGATAATTCTGCCTACTTT      | 21 | 12   | 21UR-6449 |
| 1777886_adh | TAAGATAATTCTGCCTACTTTA     | 22 | 1    | 21UR-6449 |
| 2729910_adh | TTTGTGGCACACATGTAAATT      | 21 | 38   | 21UR-6452 |
| 256915_adh  | AATTTGTGGCACACATGTAAATT    | 23 | 1    | 21UR-6452 |
| 1929194_adh | TATTTACTCACTGGAAAATTG      | 21 | 6    | 21UR-6475 |
| 1929195_adh | TATTTACTCACTGGAAAATTGA     | 22 | 1    | 21UR-6475 |
| 1908070_adh | TATGACGAACAATTCAACTCT      | 21 | 29   | 21UR-6476 |
| 1908071_adh | TATGACGAACAATTCAACTCTA     | 22 | 1    | 21UR-6476 |
| 1908073_adh | TATGACGAACAATTCAACTCTACTGC | 26 | 1    | 21UR-6476 |
| 2739767_adh | TTTTCTGTTCGTGGACACAAT      | 21 | 2988 | 21UR-6485 |
| 2739768_adh | TTTTCTGTTCGTGGACACAATT     | 22 | 3    | 21UR-6485 |
| 2739771_adh | TTTTCTGTTCGTGGACACAATTT    | 23 | 1    | 21UR-6485 |
| 1916487_adh | TATGGTCCCGGAATCAATCAG      | 21 | 9    | 21UR-6497 |
| 1916489_adh | TATGGTCCCGGAATCAATCAGT     | 22 | 1    | 21UR-6497 |
| 1787881_adh | TAAGTCCTGGATTGAAATTTT      | 21 | 3    | 21UR-6520 |
| 1787882_adh | TAAGTCCTGGATTGAAATTTTA     | 22 | 1    | 21UR-6520 |
| 2621301_adh | TTCTTCGAAGATCTTCAAGGG      | 21 | 31   | 21UR-6527 |
| 249192_adh  | AATTCTTCGAAGATCTTCAAGGG    | 23 | 1    | 21UR-6527 |
| 1830344_adh | TACTAGTGCTTCGGAAAACAA      | 21 | 55   | 21UR-6535 |
| 597744_adh  | ATACTAGTGCTTCGGAAAACAA     | 22 | 1    | 21UR-6535 |
| 204526_adh  | AATACTAGTGCTTCGGAAAACAA    | 23 | 1    | 21UR-6535 |
| 2552551_adh | TTAATTTAAAGCACGAGACTT      | 21 | 382  | 21UR-6576 |
| 704487_adh  | ATTAATTTAAAGCACGAGACTT     | 22 | 1    | 21UR-6576 |
| 2561722_adh | TTAGAATCTAGAGTTGAGCAA      | 21 | 68   | 21UR-6612 |
| 2561723_adh | TTAGAATCTAGAGTTGAGCAAAA    | 23 | 1    | 21UR-6612 |
| 1964646_adh | TCAGGTAAGTAAGAAAACATA      | 21 | 1262 | 21UR-6638 |

|             |                            |    |      |           |
|-------------|----------------------------|----|------|-----------|
| 1964647_adh | TCAGGTAAGTAAGAAAATAAA      | 22 | 1    | 21UR-6638 |
| 213589_adh  | AATCAGGTAAGTAAGAAAATAAA    | 23 | 3    | 21UR-6638 |
| 1829132_adh | TACGTTTCCTATATGGAGATC      | 21 | 13   | 21UR-6640 |
| 204428_adh  | AATACGTTTCCTATATGGAGATC    | 23 | 1    | 21UR-6640 |
| 2556850_adh | TTACGCACACGGTGAAGATTT      | 21 | 31   | 21UR-6649 |
| 1096268_adh | CTTACGCACACGGTGAAGATTT     | 22 | 1    | 21UR-6649 |
| 2066531_adh | TGAAAAATTCCTAAGATGGTG      | 21 | 161  | 21UR-6656 |
| 223373_adh  | AATGAAAAATTCCTAAGATGGTG    | 23 | 1    | 21UR-6656 |
| 2687247_adh | TTGTTTCTACATCGTTGGGGC      | 21 | 223  | 21UR-6689 |
| 254585_adh  | AATTGTTTCTACATCGTTGGGGC    | 23 | 1    | 21UR-6689 |
| 1810898_adh | TACACCCAGAATAAATTCAG       | 21 | 18   | 21UR-6700 |
| 1810899_adh | TACACCCAGAATAAATTCAGA      | 22 | 1    | 21UR-6700 |
| 1810900_adh | TACACCCAGAATAAATTCAGAA     | 23 | 1    | 21UR-6700 |
| 1978601_adh | TCCAGGAACTCAAGGGACGAT      | 21 | 565  | 21UR-6712 |
| 1978604_adh | TCCAGGAACTCAAGGGACGATT     | 22 | 2    | 21UR-6712 |
| 1773155_adh | TAAGAAAACCTGGACGTTTACACA   | 21 | 15   | 21UR-6718 |
| 1773156_adh | TAAGAAAACCTGGACGTTTACACAAA | 23 | 1    | 21UR-6718 |
| 200282_adh  | AATAAGAAAACCTGGACGTTTACACA | 23 | 1    | 21UR-6718 |
| 2042660_adh | TCTCTCTGCATATATCTCATT      | 21 | 638  | 21UR-6737 |
| 2042661_adh | TCTCTCTGCATATATCTCATT      | 22 | 1    | 21UR-6737 |
| 1931436_adh | TATTTTTGTGCAACTTCTTGA      | 21 | 62   | 21UR-6754 |
| 1931437_adh | TATTTTTGTGCAACTTCTTGA      | 22 | 1    | 21UR-6754 |
| 2597326_adh | TTCCATGCATTTACATTTGAA      | 21 | 9    | 21UR-6766 |
| 246485_adh  | AATTCCATGCATTTACATTTGAA    | 23 | 1    | 21UR-6766 |
| 2568507_adh | TTAGGCATTGGTGTACTTGCG      | 21 | 28   | 21UR-6768 |
| 2568508_adh | TTAGGCATTGGTGTACTTGCGT     | 22 | 7    | 21UR-6768 |
| 2568509_adh | TTAGGCATTGGTGTACTTGCGTG    | 23 | 1    | 21UR-6768 |
| 2568510_adh | TTAGGCATTGGTGTACTTGCGTGT   | 24 | 2    | 21UR-6768 |
| 1965301_adh | TCAGTAACGTCTCTTTTTCT       | 21 | 13   | 21UR-6778 |
| 628414_adh  | ATCAGTAACGTCTCTTTTTCT      | 22 | 1    | 21UR-6778 |
| 2139393_adh | TGAATATGAATGACGAACGGA      | 21 | 2177 | 21UR-6799 |
| 2139398_adh | TGAATATGAATGACGAACGGAT     | 22 | 6    | 21UR-6799 |
| 662890_adh  | ATGAATATGAATGACGAACGGA     | 22 | 1    | 21UR-6799 |
| 224823_adh  | AATGAATATGAATGACGAACGGA    | 23 | 2    | 21UR-6799 |
| 2139400_adh | TGAATATGAATGACGAACGGATGT   | 24 | 1    | 21UR-6799 |
| 1941991_adh | TCAATGATTAACGGTACTACT      | 21 | 37   | 21UR-6804 |
| 210582_adh  | AATCAATGATTAACGGTACTACT    | 23 | 1    | 21UR-6804 |
| 1838413_adh | TAGAACGACGCCAACGATATT      | 21 | 48   | 21UR-6818 |
| 542353_adh  | AGTAGAACGACGCCAACGATATTC   | 24 | 1    | 21UR-6818 |
| 1838414_adh | TAGAACGACGCCAACGATATTCTAA  | 25 | 2    | 21UR-6818 |
| 1985447_adh | TCCGCGGTTCGTACGGCAGATT     | 21 | 539  | 21UR-6828 |
| 1985449_adh | TCCGCGGTTCGTACGGCAGATTT    | 22 | 2    | 21UR-6828 |
| 215550_adh  | AATCCGCGGTTCGTACGGCAGATT   | 23 | 1    | 21UR-6828 |
| 1866854_adh | TAGGCAAGAGCGGGTGAAGAA      | 21 | 263  | 21UR-6834 |
| 1866855_adh | TAGGCAAGAGCGGGTGAAGAAAA    | 23 | 1    | 21UR-6834 |
| 2648727_adh | TTGCAAGTACGACCACGAAAG      | 21 | 33   | 21UR-6844 |
| 1111095_adh | CTTGCAAGTACGACCACGAAAG     | 22 | 1    | 21UR-6844 |
| 1805007_adh | TAATTTTCGTCAGCATGGCTAG     | 21 | 521  | 21UR-6910 |
| 1805012_adh | TAATTTTCGTCAGCATGGCTAGT    | 22 | 2    | 21UR-6910 |
| 2677238_adh | TTGTATTGATGGTATGGGCT       | 21 | 94   | 21UR-6913 |

|             |                            |    |      |                 |
|-------------|----------------------------|----|------|-----------------|
| 2677240_adh | TTGTATTGATGGTGATGGGCTT     | 22 | 2    | 21UR-6913       |
| 2644073_adh | TTGATCATTTCATGTAACGGTT     | 21 | 138  | 21UR-6916       |
| 250704_adh  | AATTGATCATTTCATGTAACGGTT   | 23 | 2    | 21UR-6916       |
| 1919972_adh | TATTAAATGAAGTAGAAAAA       | 21 | 100  | 21UR-6933       |
| 1919974_adh | TATTAAATGAAGTAGAAAAAAT     | 22 | 4    | 21UR-6933       |
| 1782809_adh | TAAGCGTAATGTGTCTGGACGC     | 21 | 48   | 21UR-6937       |
| 1782811_adh | TAAGCGTAATGTGTCTGGACGCTAAT | 25 | 1    | 21UR-6937       |
| 750583_adh  | CAAAAAAGAGTAGAAGGAATC      | 21 | 516  | 21UR-6939       |
| 750584_adh  | CAAAAAAGAGTAGAAGGAATCA     | 22 | 1    | 21UR-6939       |
| 2391989_adh | TGGATGGTTGAAGAAGGAGTA      | 21 | 1605 | 21UR-6953       |
| 2391991_adh | TGGATGGTTGAAGAAGGAGTAT     | 22 | 4    | 21UR-6953       |
| 2391992_adh | TGGATGGTTGAAGAAGGAGTATCGT  | 25 | 1    | 21UR-6953       |
| 2131384_adh | TGAAGCGCTGAAAATCATCAA      | 21 | 16   | 21UR-6955       |
| 224570_adh  | AATGAAGCGCTGAAAATCATCAA    | 23 | 1    | 21UR-6955       |
| 1962326_adh | TCAGCATAACTCATTTTTTAA      | 21 | 52   | 21UR-7003       |
| 213475_adh  | AATCAGCATAACTCATTTTTTAA    | 23 | 1    | 21UR-7003       |
| 2581379_adh | TTATTCATTTCGGACAAAAATT     | 21 | 632  | 21UR-7014       |
| 1099963_adh | CTTATTCATTTCGGACAAAAATT    | 22 | 1    | 21UR-7014       |
| 2581380_adh | TTATTCATTTCGGACAAAAATT     | 22 | 1    | 21UR-7014       |
| 1821086_adh | TACCTGTGTGTTTGTTACAAA      | 21 | 11   | 21UR-7025       |
| 595770_adh  | ATACCTGTGTGTTTGTTACAAA     | 22 | 1    | 21UR-7025       |
| 1764945_adh | TAACAGACTTATAAAGACATT      | 21 | 120  | 21UR-7029       |
| 1025913_adh | CTAACAGACTTATAAAGACATT     | 22 | 1    | 21UR-7029       |
| 1929123_adh | TATTTAATTTTTCGCGAGTAGAA    | 21 | 173  | 21UR-7045       |
| 2693036_adh | TTTAATTTTTCGCGAGTAGAAAA    | 21 | 1    | 36_x1/21UR-7045 |
| 1929124_adh | TATTTAATTTTTCGCGAGTAGAAAA  | 23 | 2    | 21UR-7045       |
| 1824022_adh | TACGATCTTCGGCAAGCTTTC      | 21 | 28   | 21UR-7048       |
| 1824024_adh | TACGATCTTCGGCAAGCTTCTCAGT  | 26 | 1    | 21UR-7048       |
| 1901979_adh | TATGAAGTTGAATGGGCATTT      | 21 | 26   | 21UR-7126       |
| 1901980_adh | TATGAAGTTGAATGGGCATTTT     | 22 | 1    | 21UR-7126       |
| 1803858_adh | TAATTGATTGTCTCCGGTCTT      | 21 | 11   | 21UR-7131       |
| 202702_adh  | AATAATTGATTGTCTCCGGTCTT    | 23 | 1    | 21UR-7131       |
| 2715302_adh | TTTGACGTGACTTCGTTCTGA      | 21 | 43   | 21UR-7141       |
| 2715303_adh | TTTGACGTGACTTCGTTCTGAA     | 22 | 3    | 21UR-7141       |
| 2715304_adh | TTTGACGTGACTTCGTTCTGAAA    | 23 | 4    | 21UR-7141       |
| 2552817_adh | TTAATTTTCGCGTACACGAATT     | 21 | 5    | 21UR-7191       |
| 244174_adh  | AATTAATTTTCGCGTACACGAATT   | 23 | 1    | 21UR-7191       |
| 2534949_adh | TGTTTTTAGAATTTTAGTCGG      | 21 | 866  | 21UR-7192       |
| 2534953_adh | TGTTTTTAGAATTTTAGTCGGT     | 22 | 6    | 21UR-7192       |
| 2534954_adh | TGTTTTTAGAATTTTAGTCGGTAT   | 24 | 1    | 21UR-7192       |
| 2015448_adh | TCGGCCTGTCATATCGTCATC      | 21 | 921  | 21UR-7199       |
| 2015449_adh | TCGGCCTGTCATATCGTCATCA     | 22 | 14   | 21UR-7199       |
| 646872_adh  | ATCGGCCTGTCATATCGTCATC     | 22 | 2    | 21UR-7199       |
| 219943_adh  | AATCGGCCTGTCATATCGTCATC    | 23 | 7    | 21UR-7199       |
| 1872501_adh | TAGGTTGTAAATTTTATCGC       | 21 | 27   | 21UR-7205       |
| 1872502_adh | TAGGTTGTAAATTTTATCGCAA     | 23 | 1    | 21UR-7205       |
| 2286207_adh | TGCACCACATCGTCGAAATTA      | 21 | 977  | 21UR-7225       |
| 2286208_adh | TGCACCACATCGTCGAAATTAC     | 22 | 1    | 21UR-7225       |
| 672965_adh  | ATGCACCACATCGTCGAAATTA     | 22 | 1    | 21UR-7225       |
| 2286209_adh | TGCACCACATCGTCGAAATTACAT   | 24 | 1    | 21UR-7225       |

|             |                            |    |             |           |
|-------------|----------------------------|----|-------------|-----------|
| 1890375_adh | TATATGGGAAATGGGAAATAA      | 21 | 59          | 21UR-7240 |
| 1890376_adh | TATATGGGAAATGGGAAATAAT     | 22 | 1           | 21UR-7240 |
| 2683601_adh | TTGTTCCAATCTTCATGGAAT      | 21 | 32          | 21UR-7250 |
| 253960_adh  | AATTGTTCCAATCTTCATGGAAT    | 23 | 1           | 21UR-7250 |
| 2561879_adh | TTAGAATTTTAGTTGACTATG      | 21 | 11          | 21UR-7255 |
| 2561880_adh | TTAGAATTTTAGTTGACTATGGTA   | 24 | 1           | 21UR-7255 |
| 2561881_adh | TTAGAATTTTAGTTGACTATGGTAT  | 25 | 2           | 21UR-7255 |
| 2169194_adh | TGACTGAACATCAAAGGAGAA      | 21 | 713         | 21UR-7261 |
| 2169195_adh | TGACTGAACATCAAAGGAGAAA     | 22 | 1           | 21UR-7261 |
| 1877829_adh | TAGTGAGACTGTTCTGAAAAA      | 21 | 47          | 21UR-7267 |
| 1877830_adh | TAGTGAGACTGTTCTGAAAAAT     | 22 | 1           | 21UR-7267 |
| 1851135_adh | TAGATCTTGACAGAAGAACAA      | 21 | 3210        | 21UR-7310 |
| 1851136_adh | TAGATCTTGACAGAAGAACAAAA    | 23 | 2           | 21UR-7310 |
| 1783846_adh | TAAGGAAATTATTAGAATGAA      | 21 | 444         | 21UR-7312 |
| 1783847_adh | TAAGGAAATTATTAGAATGAAA     | 22 | 1           | 21UR-7312 |
| 1914037_adh | TATGGAGAATGTATGTATTGT      | 21 | 243         | 21UR-7347 |
| 1914038_adh | TATGGAGAATGTATGTATTGTA     | 22 | 2           | 21UR-7347 |
| 1852716_adh | TAGCAAAAGTGAGCTGAAATA      | 21 | 1155        | 21UR-7348 |
| 1852717_adh | TAGCAAAAGTGAGCTGAAATAC     | 22 | 1           | 21UR-7348 |
| 205888_adh  | AATAGCAAAAGTGAGCTGAAATA    | 23 | 3           | 21UR-7348 |
| 1850361_adh | TAGATAGGCAGGATTGCAAAA      | 21 | 44          | 21UR-7349 |
| 1850362_adh | TAGATAGGCAGGATTGCAAAAT     | 22 | 1           | 21UR-7349 |
| 2644451_adh | TTGATCTCCAATTAAGGATAA      | 21 | 4           | 21UR-7365 |
| 726908_adh  | ATTGATCTCCAATTAAGGATAA     | 22 | 1           | 21UR-7365 |
| 1928108_adh | TATTGTGTTGAGAGATTTTT       | 21 | 233         | 21UR-7393 |
| 1928109_adh | TATTGTGTTGAGAGATTTTTT      | 22 | 1           | 21UR-7393 |
| 1851904_adh | TAGATTACGTGAATAAAGAGA      | 21 | 9           | 21UR-7436 |
| 2565705_adh | TTAGATTACGTGAATAAAGAGA     | 22 | 1           | 21UR-7436 |
| 1823836_adh | TACGATCACTGGTTTATTTGT      | 21 | 39          | 21UR-7437 |
| 1823837_adh | TACGATCACTGGTTTATTTGTAA    | 23 | 1           | 21UR-7437 |
| 2590328_adh | TTCAGAACTATTCGACTGCTT      | 21 | 568         | 21UR-7495 |
| 711906_adh  | ATTCAGAACTATTCGACTGCTT     | 22 | 1           | 21UR-7495 |
| 246129_adh  | AATTCAGAACTATTCGACTGCTT    | 23 | 1           | 21UR-7495 |
| 1946438_adh | TCACATTTTAGATAACTGGTT      | 21 | 1112        | 21UR-7569 |
| 212566_adh  | AATCACATTTTAGATAACTGGTT    | 23 | 2           | 21UR-7569 |
| 1946442_adh | TCACATTTTAGATAACTGGTTTCTTA | 26 | 1           | 21UR-7569 |
| 1860063_adh | TAGGAAAACGAAAACGCATA       | 21 | 899         | 21UR-7574 |
| 1035201_adh | CTAGGAAAACGAAAACGCATA      | 22 | 2           | 21UR-7574 |
| 1860064_adh | TAGGAAAACGAAAACGCATAT      | 22 | 2           | 21UR-7574 |
| 1860065_adh | TAGGAAAACGAAAACGCATATC     | 23 | 1           | 21UR-7574 |
| 2690596_adh | TTTAAGGATTGAAGGTATTTT      | 21 | 1031        | 21UR-7584 |
| 2548393_adh | TTAAGGATTGAAGGTATTTT       | 21 | 7 393_x7/21 | 21UR-7584 |
| 2690598_adh | TTTAAGGATTGAAGGTATTTT      | 22 | 1           | 21UR-7584 |
| 1326459_adh | GATTTAAGGATTGAAGGTATTTT    | 24 | 1           | 21UR-7584 |
| 2059994_adh | TCTTGTGTTCCGGTTTCAAA       | 21 | 1           | 21UR-7596 |
| 223200_adh  | AATCTTGTGTTCCGGTTTCAAA     | 23 | 1           | 21UR-7596 |
| 2550935_adh | TTAATGAACTTTTTAATCGGC      | 21 | 2938        | 21UR-7645 |
| 2550936_adh | TTAATGAACTTTTTAATCGGCA     | 22 | 9           | 21UR-7645 |
| 244109_adh  | AATTAATGAACTTTTTAATCGGC    | 23 | 2           | 21UR-7645 |
| 2289152_adh | TGCAGTGACGGATCTGTTTT       | 21 | 4922        | 21UR-7654 |

|             |                            |    |     |           |
|-------------|----------------------------|----|-----|-----------|
| 1071339_adh | CTGCAGTGGACGGATCTGTTTT     | 22 | 2   | 21UR-7654 |
| 2289156_adh | TGCAGTGGACGGATCTGTTTT      | 22 | 15  | 21UR-7654 |
| 2289162_adh | TGCAGTGGACGGATCTGTTTTTG    | 23 | 1   | 21UR-7654 |
| 2050301_adh | TCTGGGAGACGGAGAATAAGA      | 21 | 180 | 21UR-7659 |
| 2050302_adh | TCTGGGAGACGGAGAATAAGAA     | 22 | 1   | 21UR-7659 |
| 2050303_adh | TCTGGGAGACGGAGAATAAGAAA    | 23 | 1   | 21UR-7659 |
| 1877079_adh | TAGTGAAACTCTTTTCTGATC      | 21 | 4   | 21UR-7668 |
| 1877080_adh | TAGTGAAACTCTTTTCTGATCGTCAA | 26 | 1   | 21UR-7668 |
| 1952995_adh | TCACGAACTGAAACTACATTTT     | 22 | 1   | 21UR-7672 |
| 1952996_adh | TCACGAACTGAAACTACATTTTACAT | 26 | 1   | 21UR-7672 |
| 2737659_adh | TTTTTCATCCGGCATAACTAAA     | 21 | 33  | 21UR-7676 |
| 2737660_adh | TTTTTCATCCGGCATAACTAAAAA   | 23 | 1   | 21UR-7676 |
| 2737661_adh | TTTTTCATCCGGCATAACTAAAAAAT | 25 | 1   | 21UR-7676 |
| 2720350_adh | TTTGATTGTATACCAAATTTG      | 21 | 466 | 21UR-7678 |
| 1122632_adh | CTTTGATTGTATACCAAATTTG     | 22 | 1   | 21UR-7678 |
| 2720353_adh | TTTGATTGTATACCAAATTTGT     | 22 | 1   | 21UR-7678 |
| 1839031_adh | TAGAAGAATTTGTGCAAAAAT      | 21 | 210 | 21UR-7724 |
| 1839032_adh | TAGAAGAATTTGTGCAAAAATAA    | 23 | 2   | 21UR-7724 |
| 2121240_adh | TGAACAGTGAAGCAGAACTTT      | 21 | 834 | 21UR-7759 |
| 2121245_adh | TGAACAGTGAAGCAGAACTTTT     | 22 | 2   | 21UR-7759 |
| 2049737_adh | TCTGGATATGTTTAAAGGTGG      | 21 | 644 | 21UR-7761 |
| 2049738_adh | TCTGGATATGTTTAAAGGTGGA     | 22 | 5   | 21UR-7761 |
| 1836901_adh | TAGAAACAGTCCGAAAAAAGT      | 21 | 32  | 21UR-7772 |
| 205378_adh  | AATAGAAACAGTCCGAAAAAAGT    | 23 | 1   | 21UR-7772 |
| 1753688_adh | TAAAATTTGTCCATACGAACC      | 21 | 3   | 21UR-7775 |
| 1753689_adh | TAAAATTTGTCCATACGAACCAA    | 23 | 1   | 21UR-7775 |
| 2713962_adh | TTTGAAGGATATAGGGCATT       | 21 | 174 | 21UR-7783 |
| 255975_adh  | AATTTGAAGGATATAGGGCATT     | 23 | 1   | 21UR-7783 |
| 2389313_adh | TGGATATTTTGATCAACGGGA      | 21 | 122 | 21UR-7848 |
| 684383_adh  | ATGGATATTTTGATCAACGGGA     | 22 | 1   | 21UR-7848 |
| 2053537_adh | TCTGTTTTGTCCGAAACTGTC      | 21 | 15  | 21UR-7911 |
| 657495_adh  | ATCTGTTTTGTCCGAAACTGTC     | 22 | 1   | 21UR-7911 |
| 1845654_adh | TAGACTCAGAAAAAACATTGA      | 21 | 5   | 21UR-7930 |
| 1845655_adh | TAGACTCAGAAAAAACATTGACGA   | 24 | 1   | 21UR-7930 |
| 1813023_adh | TACATAAGATGTTTGTTTTCG      | 21 | 11  | 21UR-7933 |
| 593443_adh  | ATACATAAGATGTTTGTTTTCG     | 22 | 1   | 21UR-7933 |
| 1761290_adh | TAAATGAATAAATCATT          | 21 | 4   | 21UR-7981 |
| 199459_adh  | AATAAATGAATAAATCATT        | 23 | 1   | 21UR-7981 |
| 2595499_adh | TTCATTTGACGTTTATGAAAA      | 21 | 6   | 21UR-8005 |
| 246349_adh  | AATTCATTTGACGTTTATGAAAA    | 23 | 1   | 21UR-8005 |
| 1925353_adh | TATTGAAGAAAAATGCACTGG      | 21 | 9   | 21UR-8033 |
| 1925354_adh | TATTGAAGAAAAATGCACTGGAA    | 23 | 1   | 21UR-8033 |
| 2729926_adh | TTTGTGGCGAAGAAGCATT        | 21 | 358 | 21UR-8053 |
| 2729928_adh | TTTGTGGCGAAGAAGCATT        | 25 | 1   | 21UR-8053 |
| 2729929_adh | TTTGTGGCGAAGAAGCATT        | 26 | 1   | 21UR-8053 |
| 220932_adh  | AATCGTGTTAGTAAATAACCACT    | 23 | 1   | 21UR-8084 |
| 1900702_adh | TATCTTTTTAAGTCGTACATA      | 21 | 618 | 21UR-8093 |
| 1900704_adh | TATCTTTTTAAGTCGTACATAT     | 22 | 1   | 21UR-8093 |
| 752781_adh  | CAAAATCTTTAGACGACAAAA      | 21 | 18  | 21UR-8107 |
| 752782_adh  | CAAAATCTTTAGACGACAAAAAT    | 22 | 1   | 21UR-8107 |

|             |                            |    |      |           |
|-------------|----------------------------|----|------|-----------|
| 2721378_adh | TTTGCATACCTCTAATAACCA      | 21 | 12   | 21UR-8116 |
| 256407_adh  | AATTTGCATACCTCTAATAACCA    | 23 | 1    | 21UR-8116 |
| 1857630_adh | TAGCGTGATGTCATCTATTTG      | 21 | 153  | 21UR-8174 |
| 1034743_adh | CTAGCGTGATGTCATCTATTTG     | 22 | 1    | 21UR-8174 |
| 2712898_adh | TTTGAACACCATAACAATCTTT     | 21 | 101  | 21UR-8191 |
| 2712899_adh | TTTGAACACCATAACAATCTTTA    | 22 | 1    | 21UR-8191 |
| 255938_adh  | AATTTGAACACCATAACAATCTTT   | 23 | 3    | 21UR-8191 |
| 2712900_adh | TTTGAACACCATAACAATCTTTAG   | 23 | 1    | 21UR-8191 |
| 2132000_adh | TGAAGCTGCAGAGATGAATCT      | 21 | 1309 | 21UR-8227 |
| 662191_adh  | ATGAAGCTGCAGAGATGAATCT     | 22 | 1    | 21UR-8227 |
| 2618340_adh | TTCTGAGGGTTTTGCAATTGCA     | 22 | 1    | 21UR-8229 |
| 1782946_adh | TAAGCTAGAAAATGGATAAAT      | 21 | 811  | 21UR-8255 |
| 1782947_adh | TAAGCTAGAAAATGGATAAATATT   | 24 | 1    | 21UR-8255 |
| 1931031_adh | TATTTTGAATGGGCGCAGGAA      | 21 | 41   | 21UR-8316 |
| 1931032_adh | TATTTTGAATGGGCGCAGGAAT     | 22 | 1    | 21UR-8316 |
| 2703721_adh | TTTCATACCGTTGGAAAAATT      | 21 | 81   | 21UR-8341 |
| 1120726_adh | CTTTCATACCGTTGGAAAAATT     | 22 | 2    | 21UR-8341 |
| 1876124_adh | TAGTCAGAAAGCTATCGGTAT      | 21 | 99   | 21UR-8397 |
| 609681_adh  | ATAGTCAGAAAGCTATCGGTAT     | 22 | 1    | 21UR-8397 |
| 1764803_adh | TAACACTTAGAACAGAATTCG      | 21 | 244  | 21UR-8406 |
| 1764804_adh | TAACACTTAGAACAGAATTCGAGA   | 24 | 1    | 21UR-8406 |
| 1790884_adh | TAATACAAATAGAAATATTGA      | 21 | 10   | 21UR-8490 |
| 1790886_adh | TAATACAAATAGAAATATTGAT     | 22 | 1    | 21UR-8490 |
| 1923025_adh | TATTATTCCGATTTTCAGATAG     | 21 | 14   | 21UR-8580 |
| 1923026_adh | TATTATTCCGATTTTCAGATAGG    | 22 | 1    | 21UR-8580 |
| 2706491_adh | TTTCCTTTTTGAACAACAGCA      | 21 | 44   | 21UR-8613 |
| 740651_adh  | ATTTCCTTTTGAACAACAGCA      | 22 | 1    | 21UR-8613 |
| 1925173_adh | TATTCTTCAGGCAGTTGCAAA      | 21 | 2    | 21UR-8686 |
| 209154_adh  | AATATTCTTCAGGCAGTTGCAAA    | 23 | 1    | 21UR-8686 |
| 1830215_adh | TACTAGCGATACTTTTTGCAG      | 21 | 34   | 21UR-8695 |
| 204521_adh  | AATACTAGCGATACTTTTTGCAG    | 23 | 1    | 21UR-8695 |
| 2694031_adh | TTTACGTAGAAAACAATTTAA      | 21 | 319  | 21UR-8715 |
| 254825_adh  | AATTTACGTAGAAAACAATTTAA    | 23 | 1    | 21UR-8715 |
| 2041203_adh | TCTCGTAGGAAAAAGCGGTTT      | 21 | 314  | 21UR-8766 |
| 2041205_adh | TCTCGTAGGAAAAAGCGGTTTT     | 22 | 2    | 21UR-8766 |
| 2041207_adh | TCTCGTAGGAAAAAGCGGTTTTGTGT | 26 | 1    | 21UR-8766 |
| 1837945_adh | TAGAACAAGTAGTCTACGGCT      | 21 | 140  | 21UR-8787 |
| 1837946_adh | TAGAACAAGTAGTCTACGGCTT     | 22 | 1    | 21UR-8787 |
| 2685958_adh | TTGTTGGAAAAATCGTCTAAT      | 21 | 235  | 21UR-8823 |
| 2685959_adh | TTGTTGGAAAAATCGTCTAATT     | 22 | 1    | 21UR-8823 |
| 1901659_adh | TATGAACTTAGGTACAACCAA      | 21 | 2    | 21UR-8909 |
| 1901660_adh | TATGAACTTAGGTACAACCAA      | 22 | 1    | 21UR-8909 |
| 2692982_adh | TTTAATTTGATCATCCGTTTT      | 21 | 26   | 21UR-8948 |
| 575968_adh  | AGTTTAATTTGATCATCCGTTTT    | 23 | 1    | 21UR-8948 |
| 1929471_adh | TATTTCAAGCTCTTGTTTTTC      | 21 | 6    | 21UR-9038 |
| 621924_adh  | ATATTTCAAGCTCTTGTTTTTC     | 22 | 1    | 21UR-9038 |
| 1909721_adh | TATGAGTAGGTGCTGAAGACG      | 21 | 360  | 21UR-9046 |
| 1909722_adh | TATGAGTAGGTGCTGAAGACGT     | 22 | 2    | 21UR-9046 |
| 1798950_adh | TAATCTGTTCCGTAGAAGAAA      | 21 | 109  | 21UR-9061 |
| 1798951_adh | TAATCTGTTCCGTAGAAGAAA      | 24 | 1    | 21UR-9061 |

|             |                            |    |      |            |
|-------------|----------------------------|----|------|------------|
| 383134_adh  | AGAAGTCGAAACATACTAGAA      | 21 | 96   | 21UR-9071  |
| 383135_adh  | AGAAGTCGAAACATACTAGAAT     | 22 | 1    | 21UR-9071  |
| 2561511_adh | TTAGAAGGCCCGGTGGAACCTG     | 21 | 2    | 21UR-9126  |
| 1802524_adh | TAATTAGAAGGCCCGGTGGAACCTGC | 25 | 1    | 21UR-9126  |
| 1811383_adh | TACTACTGGAGTTTTTAGATTT     | 21 | 19   | 21UR-9190  |
| 1811384_adh | TACTACTGGAGTTTTTAGATTTA    | 22 | 1    | 21UR-9190  |
| 2572527_adh | TTAGTTGAAGTTATGGCTAGT      | 21 | 502  | 21UR-9276  |
| 2572530_adh | TTAGTTGAAGTTATGGCTAGTT     | 22 | 1    | 21UR-9276  |
| 2572533_adh | TTAGTTGAAGTTATGGCTAGTTT    | 23 | 1    | 21UR-9276  |
| 2528767_adh | TGTTGAGCAGGTTGGTGT         | 21 | 1    | 21UR-9284  |
| 77732_adh   | AAATGTTGAGCAGGTTGGTGT      | 24 | 1    | 21UR-9284  |
| 2351418_adh | TGGAATGGACGAAACCCACAA      | 21 | 11   | 21UR-9292  |
| 232176_adh  | AATGGAATGGACGAAACCCACAA    | 23 | 1    | 21UR-9292  |
| 1912915_adh | TATGCGACAGTACGTATGAAA      | 21 | 57   | 21UR-9501  |
| 2579154_adh | TTATGCGACAGTACGTATGAAAA    | 23 | 1    | 21UR-9501  |
| 1912917_adh | TATGCGACAGTACGTATGAAAATTG  | 25 | 1    | 21UR-9501  |
| 1858358_adh | TAGCTGAACGAAGGAGATATC      | 21 | 49   | 21UR-9510  |
| 1858359_adh | TAGCTGAACGAAGGAGATATCAATG  | 25 | 1    | 21UR-9510  |
| 2617278_adh | TTCTCTGAAGGCATATTTTTG      | 21 | 3050 | 21UR-9596  |
| 2617281_adh | TTCTCTGAAGGCATATTTTTGT     | 22 | 19   | 21UR-9596  |
| 2617284_adh | TTCTCTGAAGGCATATTTTTGTGT   | 24 | 1    | 21UR-9596  |
| 1936301_adh | TCAACCAGTAGACATTTATTA      | 21 | 983  | 21UR-9673  |
| 1936302_adh | TCAACCAGTAGACATTTATTA      | 23 | 1    | 21UR-9673  |
| 1765778_adh | TAACATATGCAAATAAGTACG      | 21 | 23   | 21UR-9720  |
| 1765779_adh | TAACATATGCAAATAAGTACGAATG  | 25 | 1    | 21UR-9720  |
| 2660719_adh | TTGGATAAGTTGTATCTTCGG      | 21 | 16   | 21UR-9779  |
| 2660720_adh | TTGGATAAGTTGTATCTTCGGG     | 22 | 1    | 21UR-9779  |
| 2660721_adh | TTGGATAAGTTGTATCTTCGGGT    | 23 | 1    | 21UR-9779  |
| 849465_adh  | CATTGGATAAGTTGTATCTTCGGG   | 24 | 1    | 21UR-9779  |
| 2311836_adh | TGCTTTGACTTAAGAAGAATT      | 21 | 2    | 21UR-9851  |
| 678413_adh  | ATGCTTTGACTTAAGAAGAATT     | 22 | 1    | 21UR-9851  |
| 1866982_adh | TAGGCACTTCAGAGCAAATAG      | 21 | 6    | 21UR-9936  |
| 1866983_adh | TAGGCACTTCAGAGCAAATAGAG    | 23 | 1    | 21UR-9936  |
| 1826246_adh | TACGGCCAAATCAGATTTCTG      | 21 | 14   | 21UR-9939  |
| 1826247_adh | TACGGCCAAATCAGATTTCTGACTGA | 26 | 1    | 21UR-9939  |
| 1884983_adh | TATAAGAAGAAAAACAAAGTTTTA   | 24 | 2    | 21UR-10159 |
| 2140638_adh | TGAATCAGAACAATGGTACCCT     | 22 | 18   | 21UR-10193 |
| 2140651_adh | TGAATCAGAACAATGGTACCCTT    | 23 | 1    | 21UR-10193 |
| 2140652_adh | TGAATCAGAACAATGGTACCCTTTT  | 25 | 1    | 21UR-10193 |
| 2140653_adh | TGAATCAGAACAATGGTACCCTTTTT | 26 | 1    | 21UR-10193 |
| 2527431_adh | TGTTGAAACGGTATGAAATTG      | 21 | 57   | 21UR-10324 |
| 2527432_adh | TGTTGAAACGGTATGAAATTGT     | 22 | 1    | 21UR-10324 |
| 2487392_adh | TGTAGAAAAGTGGTTGCTTGT      | 21 | 1    | 21UR-10334 |
| 1879293_adh | TAGTGTAGAAAAGTGGTTGCTTGT   | 24 | 10   | 21UR-10334 |
| 2142629_adh | TGAATCGTTGAACCAATTTTA      | 21 | 3    | 21UR-10357 |
| 224852_adh  | AATGAATCGTTGAACCAATTTTA    | 23 | 1    | 21UR-10357 |
| 1788018_adh | TAAGTCGTTGATGATCGTTTT      | 21 | 135  | 21UR-10477 |
| 200783_adh  | AATAAGTCGTTGATGATCGTTTT    | 23 | 2    | 21UR-10477 |
| 902821_adh  | CCTTCAAGAACAATGCAAAAAG     | 21 | 11   | 21UR-10497 |
| 902822_adh  | CCTTCAAGAACAATGCAAAAAGC    | 22 | 1    | 21UR-10497 |

|             |                             |    |     |            |
|-------------|-----------------------------|----|-----|------------|
| 2734699_adh | TTTTAGCGGTAGATTCGTTTT       | 21 | 177 | 21UR-10518 |
| 746303_adh  | ATTTTAGCGGTAGATTCGTTTT      | 22 | 1   | 21UR-10518 |
| 2611947_adh | TTCGTCGAAAACCTTTGGCATC      | 21 | 11  | 21UR-10590 |
| 247673_adh  | AATTCGTCGAAAACCTTTGGCATC    | 23 | 1   | 21UR-10590 |
| 2533467_adh | TGTTTGTGGAAGCGTGAGCAT       | 21 | 53  | 21UR-10640 |
| 2533468_adh | TGTTTGTGGAAGCGTGAGCATT      | 22 | 1   | 21UR-10640 |
| 1928687_adh | TATTGTTTGTGGAAGCGTGAGCATT   | 25 | 1   | 21UR-10640 |
| 1928688_adh | TATTGTTTGTGGAAGCGTGAGCATTT  | 26 | 1   | 21UR-10640 |
| 1754038_adh | TAAACAAGGGACTGTTAGGGA       | 21 | 21  | 21UR-10819 |
| 2539284_adh | TTAAACAAGGGACTGTTAGGGA      | 22 | 21  | 21UR-10819 |
| 2539285_adh | TTAAACAAGGGACTGTTAGGGAC     | 23 | 1   | 21UR-10819 |
| 2539286_adh | TTAAACAAGGGACTGTTAGGGACAC   | 25 | 1   | 21UR-10819 |
| 1185383_adh | GAAGTGGAAGAGTAATGAAGA       | 21 | 1   | 21UR-10827 |
| 1185384_adh | GAAGTGGAAGAGTAATGAAGATGT    | 24 | 1   | 21UR-10827 |
| 1686904_adh | GTTAATTTTCATTTTCGGATTTGCGTC | 26 | 9   | 21UR-10895 |
| 2530884_adh | TGTTGTGACGAATAACGGCAA       | 21 | 13  | 21UR-11056 |
| 701373_adh  | ATGTTGTGACGAATAACGGCAA      | 22 | 1   | 21UR-11056 |
| 1927828_adh | TATTGTATTGTAAGGTTTGA        | 21 | 102 | 21UR-11180 |
| 1927829_adh | TATTGTATTGTAAGGTTTGAA       | 22 | 6   | 21UR-11180 |
| 1922991_adh | TATTATTCAAGTAGATAATTT       | 21 | 51  | 21UR-11188 |
| 1922992_adh | TATTATTCAAGTAGATAATTTCA     | 23 | 1   | 21UR-11188 |
| 1796050_adh | TAATATCTTGTGGGCATATAA       | 21 | 40  | 21UR-11764 |
| 1796051_adh | TAATATCTTGTGGGCATATAAA      | 22 | 1   | 21UR-11764 |
| 1750614_adh | TAAAATACTTGAGAAAAATTT       | 21 | 11  | 21UR-11782 |
| 1750615_adh | TAAAATACTTGAGAAAAATTTGAT    | 24 | 1   | 21UR-11782 |
| 148853_adh  | AAGCACGGCCTCTGTGAAATT       | 21 | 1   | 21UR-11809 |
| 1781565_adh | TAAGCACGGCCTCTGTGAAATT      | 22 | 1   | 21UR-11809 |
| 2687649_adh | TTGTTTGTGGAAGCGTGAGCA       | 21 | 1   | 21UR-11964 |
| 1928686_adh | TATTGTTTGTGGAAGCGTGAGCA     | 23 | 1   | 21UR-11964 |
| 1927177_adh | TATTGGGAAGAAGACAAAATCGTCTA  | 26 | 1   | 21UR-12226 |
| 1930846_adh | TATTTTCACCTTAACTTTAGA       | 21 | 2   | 21UR-12381 |
| 1930847_adh | TATTTTCACCTTAACTTTAGAC      | 22 | 1   | 21UR-12381 |
| 1927499_adh | TATTGTAATTTTTGTATCATC       | 21 | 4   | 21UR-12395 |
| 1927500_adh | TATTGTAATTTTTGTATCATCA      | 22 | 1   | 21UR-12395 |
| 1835704_adh | TACTTGATAGATACAGTAGTGT      | 21 | 6   | 21UR-12475 |
| 205281_adh  | AATACTTGTAGATACAGTAGTGT     | 23 | 1   | 21UR-12475 |
| 1801978_adh | TAATGTTGTAATAGCTACTCG       | 21 | 3   | 21UR-12502 |
| 1801979_adh | TAATGTTGTAATAGCTACTCGGAA    | 24 | 1   | 21UR-12502 |
| 1796957_adh | TAATATGTTTTCAAGAAAATC       | 21 | 1   | 21UR-12516 |
| 201123_adh  | AATAATATGTTTTCAAGAAAATC     | 23 | 1   | 21UR-12516 |
| 705328_adh  | ATTACGACTCAACGACTAACT       | 21 | 2   | 21UR-12582 |
| 1920818_adh | TATTACGACTCAACGACTAACT      | 22 | 1   | 21UR-12582 |
| 2748637_adh | TTTTTTCATTGGATTGTGCGTA      | 21 | 453 | 21UR-12608 |
| 257765_adh  | AATTTTTTCATTGGATTGTGCGTA    | 23 | 1   | 21UR-12608 |
| 2687327_adh | TTGTTTCTTTAAATGACATAC       | 21 | 2   | 21UR-12812 |
| 2687328_adh | TTGTTTCTTTAAATGACATACA      | 22 | 1   | 21UR-12812 |
| 251797_adh  | AATTGCGAACACAGCTTTTTAGT     | 23 | 1   | 21UR-12870 |
| 2626918_adh | TTGAACTGTGGCGTGACTTATCGA    | 24 | 1   | 21UR-13283 |
| 1810844_adh | TACACCAAATCTGAATTTTT        | 21 | 117 | 21UR-13591 |
| 1810845_adh | TACACCAAATCTGAATTTTTAA      | 23 | 1   | 21UR-13591 |

|             |                              |    |    |             |
|-------------|------------------------------|----|----|-------------|
| 203066_adh  | AATACACCAAAATCTGAATTTTT      | 23 | 1  | 21UR-13591  |
| 1758133_adh | TAAAGGGGAAGGCCTTGTTTG        | 21 | 5  | 21UR-13660  |
| 199122_adh  | AATAAAGGGGAAGGCCTTGTTTG      | 23 | 1  | 21UR-13660  |
| 670824_adh  | ATGATTGCACCAGATGTAATGA       | 22 | 2  | 21UR-13716  |
| 228837_adh  | AATGATTGCACCAGATGTAATGA      | 23 | 2  | 21UR-13716  |
| 2588763_adh | TTCAATTAATAAGCAAATTCG        | 21 | 3  | 21UR-14433  |
| 246040_adh  | AATTC AATTAATAAGCAAATTCG     | 23 | 1  | 21UR-14433  |
| 2016373_adh | TCGGGAAGAAATTATCGGCCA        | 21 | 1  | 21UR-15009  |
| 718356_adh  | ATTCGGGAAGAAATTATCGGCCAA     | 24 | 1  | 21UR-15009  |
| 1923877_adh | TATTCCAATGGGTCGTTGTGAA       | 22 | 1  | 21UR-15200  |
| 1835688_adh | TACTTG TAGAACGACAGGAAA       | 21 | 99 | 21UR-15353  |
| 1835689_adh | TACTTG TAGAACGACAGGAAAA      | 22 | 2  | 21UR-15353  |
| 1822112_adh | TACGACAGGAGATGAATACAA        | 21 | 17 | 21UR-15378  |
| 1822113_adh | TACGACAGGAGATGAATACAAA       | 22 | 1  | 21UR-15378  |
| 1809268_adh | TACAATAATAGAAGAACATGG        | 21 | 58 | 21UR-15401  |
| 1809269_adh | TACAATAATAGAAGAACATGGC       | 22 | 1  | 21UR-15401  |
| 1443334_adh | GGAATTA AAAATTTGATCATGG      | 21 | 1  | 21UR-15578  |
| 1443335_adh | GGAATTA AAAATTTGATCATGGT     | 22 | 1  | 21UR-15578  |
| 515525_adh  | AGGGAATTA AAAATTTGATCATGGT   | 24 | 1  | 21UR-15578  |
| 515526_adh  | AGGGAATTA AAAATTTGATCATGGTT  | 25 | 1  | 21UR-15578  |
| 515528_adh  | AGGGAATTA AAAATTTGATCATGGTTT | 26 | 1  | 21UR-15578  |
| 1264191_adh | GAGGGATGGTAAACGAACGAA        | 21 | 15 | 21UR-15588  |
| 1264196_adh | GAGGGATGGTAAACGAACGAAG       | 22 | 54 | 21UR-15588  |
| 1264197_adh | GAGGGATGGTAAACGAACGAAGG      | 23 | 28 | 21UR-15588  |
| 1375496_adh | GCGAGGGATGGTAAACGAACGAA      | 23 | 1  | 21UR-15588  |
| 1264199_adh | GAGGGATGGTAAACGAACGAAGG      | 24 | 2  | 21UR-15588  |
| 1375498_adh | GCGAGGGATGGTAAACGAACGAAG     | 24 | 2  | 21UR-15588  |
| 1487746_adh | GGCGAGGGATGGTAAACGAACGAA     | 24 | 1  | 21UR-15588  |
| 1375499_adh | GCGAGGGATGGTAAACGAACGAAGG    | 25 | 1  | 21UR-15588  |
| 1375500_adh | GCGAGGGATGGTAAACGAACGAAGGG   | 26 | 1  | 21UR-15588  |
| 1487747_adh | GGCGAGGGATGGTAAACGAACGAAGG   | 26 | 2  | 21UR-15588  |
| 1753985_adh | TAAACAAGGCATGTGTAGGAAAGGC    | 25 | 2  | 21UR-15650  |
| 1753986_adh | TAAACAAGGCATGTGTAGGAAAGGCA   | 26 | 1  | 21UR-15650  |
| 713431_adh  | ATTCCAGACACACAGAAGGAAG       | 22 | 1  | 21UR-15660  |
| 246413_adh  | AATCCAGACACACAGAAGGAAG       | 23 | 2  | 21UR-15660  |
| 657440_adh  | ATCTGTTGTCGATGGGTCAATA       | 22 | 1  | 21UR-15664  |
| 1170544_adh | GAAGAGGAGAGGTAAATCTACGGA     | 24 | 1  | 21UR-15673  |
| 1980122_adh | TCCATTTTTTATTACAATTTA        | 21 | 2  | 1980122_adh |
| 214943_adh  | AATCCATTTTTTATTACAATTTA      | 23 | 1  | 1980122_adh |
| 2127140_adh | TGAAGAAGACGGACAAAGCCA        | 21 | 20 | 2127140_adh |
| 2127141_adh | TGAAGAAGACGGACAAAGCCAGC      | 23 | 1  | 2127140_adh |
| 2375908_adh | TGGACGAAATTGCAATATGTT        | 21 | 1  | 2375908_adh |
| 2658343_adh | TTGGACGAAATTGCAATATGTT       | 22 | 4  | 2375908_adh |
| 2658344_adh | TTGGACGAAATTGCAATATGTTT      | 23 | 1  | 2375908_adh |
| 2658345_adh | TTGGACGAAATTGCAATATGTTCA     | 24 | 1  | 2375908_adh |
| 2486875_adh | TGTACGGGCTTCTGTTTGGCA        | 21 | 1  | 2486875_adh |
| 1917491_adh | TATGTACGGGCTTCTGTTTGGCA      | 23 | 1  | 2486875_adh |
| 2561495_adh | TTAGAAGGAACGGCGGACATA        | 21 | 1  | 2561495_adh |
| 1921289_adh | TATTAGAAGGAACGGCGGACATAA     | 24 | 1  | 2561495_adh |
| 2563894_adh | TTAGATCAGTGCTGTGCGGCT        | 21 | 1  | 2563894_adh |

|             |                            |    |     |             |
|-------------|----------------------------|----|-----|-------------|
| 2695648_adh | TTTAGATCAGTGCTGTGCGGCT     | 22 | 105 | 2563894_adh |
| 2695650_adh | TTTAGATCAGTGCTGTGCGGCTC    | 23 | 1   | 2563894_adh |
| 1422524_adh | GCTTTAGATCAGTGCTGTGCGGCTCT | 26 | 1   | 2563894_adh |
| 2587849_adh | TTCAATCGTTGCTGAATGGCG      | 21 | 2   | 2587849_adh |
| 2474542_adh | TGGTTCAATCGTTGCTGAATGGCGAA | 26 | 1   | 2587849_adh |
| 2593298_adh | TTCAGTTGACAATGGTTTTTT      | 21 | 526 | 2593298_adh |
| 712600_adh  | ATTCAGTTGACAATGGTTTTTT     | 22 | 1   | 2593298_adh |
| 2648399_adh | TTGCAACTGAAGAATCAAAAT      | 21 | 1   | 2648399_adh |
| 2529328_adh | TGTTGCAACTGAAGAATCAAAAATAT | 25 | 1   | 2648399_adh |
| 2664429_adh | TTGGATTGTCGCAGTCGGTTA      | 21 | 7   | 2664429_adh |
| 2476676_adh | TGGTTGGATTGTCGCAGTCGGTTA   | 24 | 1   | 2664429_adh |
| 2674955_adh | TTGTAGATATAGAAGACTTAT      | 21 | 1   | 2674955_adh |
| 2456776_adh | TGGGGTTGTAGATATAGAAGACTTAT | 26 | 4   | 2674955_adh |
| 2682341_adh | TTGTGTGCCGTCGTTGGTTTT      | 21 | 1   | 2682341_adh |
| 2584333_adh | TTATTTGTGTGCCGTCGTTGGTTTT  | 26 | 1   | 2682341_adh |
